# Supplementary material for: Assessment of cervical softening and the prediction of preterm birth (STIPP): protocol for a prospective cohort study
Source: PubMed Central journal article supplement — BMJ Open. 2023 Nov 21;13(11):e071597. doi: 10.1136/bmjopen-2023-071597 (PMC10668305; doi:10.1136/bmjopen-2023-071597), 2023-11-21
Supplement: bmjopen-2023-071597.draft_revisions.pdf [file bmjopen-2023-071597.draft_revisions.pdf]

# BMJ Open

BMJ Open is committed to open peer review. As part of this commitment we make the peer review history of every article we publish publicly available.

When an article is published we post the peer reviewers' comments and the authors' responses online. We also post the versions of the paper that were used during peer review. These are the versions that the peer review comments apply to.

The versions of the paper that follow are the versions that were submitted during the peer review process. They are not the versions of record or the final published versions. They should not be cited or distributed as the published version of this manuscript.

BMJ Open is an open access journal and the full, final, typeset and author-corrected version of record of the manuscript is available on our site with no access controls, subscription charges or pay-per-view fees (<http://bmjopen.bmj.com>).

If you have any questions on BMJ Open's open peer review process please email [info.bmjopen@bmj.com](mailto:info.bmjopen@bmj.com)

# BMJ Open

## Assessment of cervical softening and the Prediction of Preterm birth: study protocol of the STIPP trial. A prospective cohort study.

|                               |                                                                                                                                                                                                                                                                                                                                                                                                                                                                                                                                                                                                                                                                                                                                                                                                                            |
|-------------------------------|----------------------------------------------------------------------------------------------------------------------------------------------------------------------------------------------------------------------------------------------------------------------------------------------------------------------------------------------------------------------------------------------------------------------------------------------------------------------------------------------------------------------------------------------------------------------------------------------------------------------------------------------------------------------------------------------------------------------------------------------------------------------------------------------------------------------------|
| Journal:                      | <i>BMJ Open</i>                                                                                                                                                                                                                                                                                                                                                                                                                                                                                                                                                                                                                                                                                                                                                                                                            |
| Manuscript ID                 | bmjopen-2023-071597                                                                                                                                                                                                                                                                                                                                                                                                                                                                                                                                                                                                                                                                                                                                                                                                        |
| Article Type:                 | Protocol                                                                                                                                                                                                                                                                                                                                                                                                                                                                                                                                                                                                                                                                                                                                                                                                                   |
| Date Submitted by the Author: | 03-Jan-2023                                                                                                                                                                                                                                                                                                                                                                                                                                                                                                                                                                                                                                                                                                                                                                                                                |
| Complete List of Authors:     | <p>Breuking, Sofie; Amsterdam UMC Locatie AMC, Obstetrics and gynaecology; Amsterdam Reproduction and Development Research Institute</p> <p>Oudijk, Martijn; Amsterdam UMC Locatie VUmc, Obstetrics; Amsterdam Reproduction and Development Research Institute</p> <p>van Eekelen, Rik; Amsterdam Reproduction and Development Research Institute, Obstetrics and Gynaecology</p> <p>de Boer, Marjon; Amsterdam UMC Locatie VUmc, Department of Obstetrics and Gynaecology; Amsterdam Reproduction and Development Research Institute</p> <p>Pajkrt, Eva; Amsterdam UMC Location AMC, Obstetrics and Gynaecology; Amsterdam Reproduction and Development Research Institute</p> <p>Hermans, Frederik; Amsterdam UMC Locatie AMC, Obstetrics and Gynaecology; Amsterdam Reproduction and Development Research Institute</p> |
| Keywords:                     | Maternal medicine < OBSTETRICS, OBSTETRICS, Prenatal diagnosis < OBSTETRICS                                                                                                                                                                                                                                                                                                                                                                                                                                                                                                                                                                                                                                                                                                                                                |
|                               |                                                                                                                                                                                                                                                                                                                                                                                                                                                                                                                                                                                                                                                                                                                                                                                                                            |

SCHOLARONE™  
Manuscripts

1  
2  
3 **Assessment of cervical Softening and the Prediction of Preterm birth: study protocol of the**  
4 **STIPP trial. A prospective cohort study.**  
5

6  
7 Sofie. H. Breuking, MD<sup>1, 2, \*</sup> Martijn A. Oudijk, MD, PhD<sup>2,3</sup>, R. van Eekelen<sup>4</sup>, M.A. de Boer, MD,  
8  
9 PhD<sup>2,3</sup> Eva. Pajkrt, MD, PhD<sup>1, 2</sup>, Frederik J. R. Hermans, MD PhD<sup>1,2</sup>  
10

11  
12 1. Amsterdam UMC location AMC, University of Amsterdam, Obstetrics and Gynaecology,  
13 Meibergdreef 9, Amsterdam, The Netherlands  
14

15  
16 2. Amsterdam Reproduction and Development Research Institute, The Netherlands  
17

18  
19 3. Amsterdam UMC location Vrije Universiteit Amsterdam, Obstetrics and Gynaecology,  
20 Boelelaan 1117, Amsterdam, The Netherlands  
21

22  
23 4. Obstetrics and Gynaecology, Centre for Reproductive Medicine, Amsterdam Reproduction  
24 and Development Research Institute, Amsterdam UMC Location AMC, Amsterdam, The  
25 Netherlands  
26

27  
28 \* corresponding author

29  
30 Correspondence to: s.h.breuking@amsterdamumc.nl  
31

32  
33 **Abstract**  
34

35  
36 **Introduction**

37 Preterm birth (PTB) is amongst the leading causes of perinatal and childhood morbidity and  
38 mortality. Therefore, accurate identification of pregnant women at high risk of PTB is key to  
39 enable obstetric healthcare professionals to apply interventions to improve perinatal and  
40 childhood outcomes.  
41

42  
43 Serial transvaginal cervical length measurement is used to screen asymptomatic pregnant  
44 women with a history of PTB. In women presenting with symptoms of threatened PTB  
45 cervical length, fetal fibronectin test or a combination of both can be used to identify  
46 women at high risk of PTB. The predictive capacity of these can be improved.  
47

48  
49 Cervical softening is precursor of cervical shortening, effacement, and dilatation and could be  
50 a new marker to identify women a high risk of preterm birth. However, predictive value of  
51 cervical softening to predict spontaneous PTB still need to be determined.  
52

53  
54  
55  
56  
57 **Methods/design**  
58  
59  
60

1  
2  
3 This is a single centre cohort study. Cervical stiffness will be investigated with an available,  
4 non-invasive CE-marked device called the Pregnoia System®. This device has been developed  
5 to evaluate consistency of the cervix based on tissue elasticity.  
6  
7

8 Two different groups will be investigated.  
9

- 10 1. Women with a history of spontaneous PTB <34 weeks. These women undergo biweekly  
11 measurement between 14 and 24 weeks of gestation.  
12
- 13 2. Women with symptoms of threatened PTB. These women will be tested once on  
14 presentation between 24 and 34 weeks of gestation  
15

16 Primary outcome is spontaneous PTB before 34 weeks for women with a history of PTB and  
17 delivery within seven days for women with threatened PTB cohort.  
18

### 19 **Ethics and dissemination**

20 The study is approved by the Medical Ethics Committee of Amsterdam UMC  
21 (METC2022.0226). Results will be disseminated through peer-reviewed journals. This protocol  
22 is published before analysis of results is done.  
23

### 24 **Trial registration**

25 Trial is registered at ClinicalTrials.gov, identifier NCT05477381, date of registration: 27th July  
26 2022.  
27  
28

### 29 **Strengths and limitations of the study**

- 30 - Since cervical softening is a precursor of cervical shortening, effacement and dilatation,  
31 cervical softening and could be a promising new marker for preterm birth. This study will  
32 be the first to evaluate the relation with cervical stiffness, measured with an aspiration  
33 technique, and the risk of preterm birth.  
34
- 35 - This study will provide evidence on the value of the cervical stiffness as a single clinical  
36 marker and in combination with other clinical markers such as cervical length to  
37 predict the risk of spontaneous preterm birth in groups of pregnant women with an  
38 increased risk of preterm birth.  
39
- 40 - A limitation of the study is the single centre design potentially limiting external validity.  
41  
42  
43  
44  
45  
46  
47  
48  
49  
50  
51  
52  
53  
54

### 55 **Background and rationale**

56 Spontaneous preterm birth (PTB), defined as delivery before 37 weeks of gestation, is the  
57  
58  
59  
60

1  
2  
3 leading cause of perinatal and neonatal morbidity and mortality(1). Rates of spontaneous PTB  
4 appears to be increasing. Annually, 15 million children are born preterm annually and is  
5 directly responsible for the death of one million neonates(2, 3). Neonates who survive PTB are  
6 at increased risk for long-term neurologic sequelae and developmental disabilities(4, 5).  
7 Identifying pregnant women at risk is important to be able to take precautionary measures,  
8 however this is a challenge for obstetric healthcare professionals.  
9

10  
11  
12  
13  
14  
15 Important obstetric and gynaecological risk factors for PTB are, midtrimester short cervical  
16 length, prior cervical surgery and previous spontaneous PTB. (6-9)

17  
18  
19 Women with a history of spontaneous PTB before 34 weeks of gestation are at a 5-fold  
20 increased risk of a spontaneous PTB in a subsequent pregnancy compared to women with a  
21 previous term birth(10). In addition to vaginal progesterone administration, biweekly cervical  
22 length screening is recommended in these women to identify women at high risk of a  
23 recurrent PTB based on short cervical length that benefit from a vaginal cerclage. However, in  
24 women with a previous PTB, the positive predictive value (PPV) of a short cervical length is  
25 34%. (11) Therefore this approach only identifies a proportion of women who will have a  
26 recurrent PTB. This calls for additional measurements to identify the group more adequately  
27 at risk for recurrent PTB.  
28  
29  
30  
31  
32  
33  
34  
35

36 Another group of pregnant women at risk of delivering PTB are women presenting with  
37 symptoms of preterm labour in the current pregnancy. These women can be triaged with  
38 transvaginal cervical length measurement and foetal fibronectin(ffn) to identify women with  
39 an increased risk of delivery within seven days. Women with a high risk of PTB at less than 32  
40 weeks of gestation are admitted to a centre with NICU facilities and treated with antenatal  
41 corticosteroids and tocolysis for 48 hours to improve perinatal outcome.(12) This combination  
42 of markers are characterized by a high negative predictive value (NPV) but a poor PPV. This  
43 results in overtreatment and unnecessary healthcare costs in women with a positive ffn test.  
44  
45  
46  
47  
48  
49  
50

51 A large proportion of women with symptoms of threatened PTB will not deliver within seven  
52 days due to the low PPV, however these women remain at risk for PTB later in pregnancy. (13-  
53 15)  
54  
55  
56

57 More adequate techniques to assess women at high risk of recurrent PTB or at high risk of  
58 delivering in a short time frame when presenting with symptoms of threatened preterm birth  
59  
60

1  
2  
3 are urgently needed. Therefore, objective measurement of the cervical consistency is a  
4 promising technique.  
5

6  
7 To maintain pregnancy and deliver at term an appropriate function of the cervix is required.  
8 Delivery is preceded by softening and shortening of the cervix. (16) Changes in cervical  
9 consistency can be detected from fertilization until delivery. Throughout pregnancy  
10 consistency of the cervix changes and will soften when approaching delivery(17, 18). Softening  
11 of the cervix precedes shortening and therefore could be a promising marker to identify an  
12 upcoming delivery at an earlier stage. Parra-Saavedra *et al.*(19) investigated this phenomenon  
13 with transvaginal ultrasound. The cervical consistency was measured by measuring the  
14 difference of the anteroposterior cervical diameter before (AP) and after (AP<sup>1</sup>) application of  
15 pressure on the cervix with the transvaginal probe. The cervical consistency was then  
16 calculated with the following formula:  $((AP^1/AP) * 100) = \text{Cervical consistency index}$ . Cervical  
17 consistency had an inverse linear relationship with gestational age. This means that cervical  
18 consistency declines, thus becomes softer, during progression of pregnancy, and that this  
19 phenomenon can be detected in pregnancy. Secondly, it demonstrated also that pregnant  
20 women with a more progressive decline in cervical consistency are more likely to have a  
21 spontaneous PTB compared to women with physiological decline in cervical consistency.  
22  
23

24  
25 Recently, a non-invasive technique has been developed to evaluate consistency of the cervix  
26 based on tissue elasticity. The Pregnolia®-system is a market available CE-marked device  
27 designed to measure cervical softening. This system provides quantitative measurements of  
28 the cervical consistency. This procedure is performed by placing a sterile probe with a  
29 diameter of 12 mm on the cervix. The probe is connected to a control unit which creates a  
30 vacuum between the tip of the probe and the cervix. The probe measures the aspiration  
31 pressure that is needed to displace the cervical tissue 4 mm inside the probe. The cervical  
32 consistency is expressed as cervical stiffness index (CSI), a pressure value (mbar) on a  
33 continuous scale from 0 (soft) to 100 (firm).  
34  
35

36  
37 A prototype has been tested and measurements were carried out in 50 non-pregnant and 50  
38 pregnant women(18). The results were in line with the study by Parra-Saavedra *et al.*(19) and  
39 showed that with progressing of pregnancy, the cervix softens and starts before shortening.  
40 By measuring the CSI, delivery could be detected earlier compared to conventional shortening  
41 of the cervix measured with transvaginal ultrasound.  
42  
43  
44  
45  
46  
47  
48  
49  
50  
51  
52  
53  
54  
55  
56  
57  
58  
59  
60

1  
2  
3 Since cervical softening is a precursor of cervical shortening, this could be a novel marker to  
4 predict spontaneous PTB and contribute to better identification of women with an increased  
5 risk of PTB. Also, the predictive value of cervical softening in combination with cervical length  
6 could be promising to improve prediction of PTB. However, these hypotheses still must be  
7 examined.  
8  
9  
10  
11  
12

13 Therefore, the aim of this cohort study is to evaluate the predictive value of the cervical  
14 stiffness index to predict the risk of spontaneous PTB in pregnant women with an increased  
15 risk of PTB.  
16  
17  
18  
19  
20

## 21 **Methods and analysis**

### 22 **Study design**

23 This study is an investigator initiated, single centre cohort study and will be performed at the  
24 Amsterdam UMC in the Netherlands. Two cohorts will be investigated:  
25  
26  
27

- 28 - Pregnant women with a history of spontaneous PTB before 34 weeks of gestation  
29 (Cohort A-STIPP).  
30
- 31 - Pregnant women presenting with symptoms of threatened PTB between 24 and 34  
32 weeks (Cohort S-STIPP).  
33  
34  
35  
36

37 The measurements of cervical stiffness will be performed in addition to standard care(Appendix  
38 1), using the aspiration technique-based device named the Pregnolia system device.  
39  
40

### 41 **Participants**

#### 42 **A-STIPP cohort**

43 Pregnant women, singleton or multiple gestation, with an increased risk of PTB based on a  
44 medical history of spontaneous PTB before 34 weeks of gestation will be included.  
45  
46  
47

#### 48 **S-STIPP cohort**

49 Pregnant women, singleton or multiple gestation, with a gestational age between 24 and 34  
50 weeks presenting with symptoms of threatened PTB, such as abdominal pain, vaginal blood  
51 loss, contractions or other complaints suggestive for threatened PTB, will be included.  
52  
53  
54  
55  
56

57 A potential subject who meets any of the following criteria will be excluded from participation  
58 in this study:  
59  
60

- Under 18 years of age.
- Signs of intrauterine infection.
- Obstetric indication for immediate delivery (advanced labour, cord prolapse, abruption, signs of foetal distress).
- Confirmed foetal abnormality.
- Confirmed preterm rupture of membranes.
- Confirmed vasa / placenta praevia.
- Severe vaginal bleeding and light bleeding that cannot be stopped.
- Signs of imminent labour such as advanced dilatation making it impossible to measure the cervix.

## Measurements

### *Cervical stiffness measurement*

The Cervical stiffness index (CSI) will be measured following measurement of the cervical length. The Pregnolia System is composed of two components: an active, reusable device and a disposable single-use sterile probe.

- The control unit is an active device with a power supply, foot switch, connector cable and an integrated pump that generates vacuum.
- The single-use sterile probe is connected to the control unit console through a connector cable. Air filters on the probe prevent microbiological contamination of the control unit. This probe is designed to minimise the contact interaction between the user and the patients during the measurement. The probe tip diameter is 12mm. Each single-use, disposable probe is packed in a sterile pouch.

To perform the measurement, the cervix is visualized with a speculum. The disposable probe is placed on the anterior lip of the cervix (12 o'clock position). The control will create a weak vacuum inside the probe that pulls the cervical tissue, very gently and slowly, into the probe tip by a fixed distance of 4mm. The negative aspiration pressure needed to deform the tissue is the outcome of the measurement. A high-pressure value corresponds with stiff tissue and a low pressure corresponds with soft tissue. An overview of the measurement is displayed in figure 1.

### *Secondary study parameters (predictors)*



- 1
- 2
- 3 - Cervical length (1)
- 4
- 5 - Fetal Fibronectin# (1)
- 6
- 7 - Twin gestation (1)
- 8
- 9 - History of spontaneous PTB (4)
- 10
- 11 - Cervical surgery (1)
- 12
- 13 - Inter-pregnancy interval (1)
- 14
- 15 - Presence of infection (1)
- 16
- 17 - Family history (1)
- 18
- 19 - Social economic status (3)
- 20
- 21 - Smoking (1)
- 22
- 23 - BMI (1)

24 # S-STIPP only (X = number of input variables)

### 25

### 26

### 27 *Sonographic measurement*

28 Cervical length measurement with transvaginal ultrasound is routine care in both cohorts.

29 The cervical length will be determined as the linear distance between internal and external  
30 cervical os, excluding the endocervical funnel as described by Kagan et al. (2015) (20).

31 In the A-STIPP cohort, transvaginal ultrasound will be done biweekly from 14 until 24 weeks  
32 of gestation. In case a short cervix is detected at less than 25 mm, a cerclage, or a pessary in  
33 study context, is placed. Afterwards measurement of CSI will not be continued.

34 In the S-STIPP cohort, the transvaginal ultrasound will be performed when a participant  
35 presents with any symptom of threatened PTB, between 24 and 34 weeks of gestation.  
36 Threatened PTB is defined as premature contractions, lower back pain, vaginal blood loss or  
37 abdominal pain.

### 38

### 39

### 40

### 41

### 42 *Questionnaire*

43 Women will be asked to fill out a structured questionnaire to screen for additional risk factors  
44 of PTB. The questionnaire contains questions about the current pregnancy, previous  
45 pregnancies, family history of PTB and cervical surgery. Baseline characteristics such as height  
46 and weight and smoking as well as information about relevant medical history will be  
47 collected. The questionnaire will be checked with the patient's electronic file.

## Blinding

For the A-STIPP cohort, clinicians and participants are blinded for the results of the CSI measurement.

In the S-STIPP cohort, the clinician working at the emergency department performs the measurement and therefore making it impossible to blind the treating clinician. The participant however is blinded for the results.

## Primary outcome

- The primary outcome for the A-STIPP cohort is spontaneous PTB before 34 weeks of gestation.
- The primary outcome for the S-STIPP cohort is delivery within 7 days.

## Secondary outcomes

- Spontaneous PTB before 37 weeks of gestation
- Spontaneous PTB before 34 weeks of gestation<sup>#</sup>
- Spontaneous PTB before 32 weeks of gestation
- Spontaneous PTB before 28 weeks of gestation
- Latency time (time between inclusion and delivery)
- Delivery within 48 hours<sup>#</sup>

<sup>#</sup> S-STIPP only

## Other outcomes

Safety of the use of the Pregnotia system (as defined in Appendix 2) will be investigated.

Also, patient discomfort of the measurement will be evaluated by a general questionnaire.

## Power analysis

We used contemporary sample size calculations described by *Riley et al.*(26) for developing prediction models, based on three criteria that each provide a sample size to satisfy that criterion, then picking the highest sample size out of the three. The following input parameters are used to calculate the required number of inclusions; 1) expected prevalence of the primary

1  
2  
3 outcome, 2) expected amount of explained variance by the prediction model, and 3) number  
4 of predictors (input variables).

5  
6 For the A-STIPP cohort the prevalence [0.18] was derived from the QUIPP-study (23, 24). (25)

7  
8 The standard level of variance [0.15] was used to calculate sample size.

9  
10 For the S-STIPP cohort, the prevalence [0.12] and variance [0.45] were derived from the  
11 Apostel I study(21, 22). Both studies have comparable patients as the A-STIPP and S-STIPP  
12 study.  
13

14  
15 To analyse CSI for the primary outcome the minimum number of inclusions are 227 and 163  
16 for A-STIPP and S-STIPP cohort, respectively.  
17

18  
19 To investigate additional input parameters with sufficient power, an increase in sample size is  
20 needed. When inclusion of participants continues and the second threshold is reached,  
21 another input parameter is added, until the next threshold and so on. The baseline predictors  
22 used in the first step will be the CSI measurement combined with cervical length measurement  
23 in the A-STIPP cohort, and cervical length with fFN in S-STIPP cohort.  
24

25  
26 See table 1 and table 2 for the steps and the threshold sample sizes. In both calculations the  
27 number of predictors was gradually increased. Continuous variables count as a single input  
28 variable, as well as dichotomous input variables. Categorical variables are counted as C-1, thus  
29 the number of input variables is the number categories minus one. The additional predictor  
30 variables are summarized in table 3.  
31  
32  
33  
34  
35  
36  
37  
38  
39

40 Sample size calculations were performed using R (R: A language and environment for  
41 statistical computing. R Foundation for Statistical Computing, Vienna, Austria.  
42 URL <https://www.R-project.org/>) with the use of the *pmsampsize* package (26). Table 1 and  
43 table 2 indicates the number of participants needed.  
44  
45  
46  
47  
48

### 49 **Statistical Analysis**

50 Baseline characteristics will be calculated used descriptive statistics. Continuous variables will be  
51 reported as mean with standard deviation or median with inter quartile range. Categorical  
52 variables will be reported as proportions.  
53  
54  
55

56 To incorporate repeated measures of CSI from the A-STIPP cohort, a logistic generalized mixed  
57 model will be used. As CSI is a continuous outcome, linear and non-linear functions will be  
58  
59  
60

1  
2  
3 compared using restricted cubic splines. A lower Akaike's Information Criterion (AIC) or overall p-  
4 value will determine which functional form is chosen.(26) If there is censoring (i.e. loss-to-follow-  
5 up), a Cox proportional hazards model for time to delivery including a time-varying covariate for  
6 CSI will be used. As a sensitivity analysis, a comparison of either of these models with a joint  
7 survival model will be done (combining a Cox model for time to delivery with a linear mixed model  
8 for CSI measurements).

9  
10  
11 For the S-STIPP cohort, a logistic regression will be used to determine the relationship between  
12 input variables and a dichotomous outcome.  
13  
14

### 15 16 17 18 19 20 21 **Monitoring and safety**

22 An independent Data and Safety Monitoring Board (DSMB) is assigned to safeguard the safety of  
23 the trial participants and provide recommendations.  
24  
25

26 Since the measurement with the Pregnonia-system is minimally invasive, the risk of adverse  
27 events related to the measurement is small. However, any Adverse Events (AEs) and Serious  
28 Adverse Events (SAEs) will be reported. If evaluation by the DSMB demonstrates increased  
29 safety risks within the trial, the DSMB can always advice to stop the trial.  
30  
31  
32  
33

### 34 35 36 **Data management**

37 Data will be collected using an accredited electronic data capture system (Castor). To protect the  
38 privacy of the participant, personal data is encrypted. Data cannot be traced back participants in  
39 reports and publications about the study. All personal data is protected according to the General  
40 Data Protection Regulation (GDPR and Dutch privacy regulation (AVG)).  
41  
42  
43  
44

45 All agreements regarding data sharing are defined in a signed Clinical Trial Agreement (CTA).  
46 General Data Protection Regulation (GDPR) are applicable to this agreement.  
47  
48  
49  
50

### 51 52 **Clinical impact**

53 This STIPP study will provide evidence on the value of the cervical stiffness as a single clinical  
54 marker and in combination with other clinical markers such as cervical length to predict the  
55 risk of spontaneous PTB in groups of pregnant women with an increased risk of PTB.  
56  
57  
58  
59  
60

## Patient and public involvement

The patient organisation care4Neo was consulted to address the view of patients.

## Ethics and dissemination

The Medical Ethics Committee of the Amsterdam UMC has given approval for this research (Number 2022.0226). All patients will give written and oral informed consent prior to entry to the study and will be made aware participation is completely voluntary.

The outcomes of the study will be published in a peer-reviewed journal.

## References

1. Blencowe H, Cousens S, Oestergaard MZ, Chou D, Moller AB, Narwal R, Adler A, Vera Garcia C, Rohde S, Say L, Lawn JE. National, regional, and worldwide estimates of preterm birth rates in the year 2010 with time trends since 1990 for selected countries: a systematic analysis and implications. *Lancet*. 2012;379(9832):2162-72.
2. Liu L, Johnson HL, Cousens S, Perin J, Scott S, Lawn JE, Rudan I, Campbell H, Cibulskis R, Li M, Mathers C, Black RE, Child Health Epidemiology Reference Group of WHO, Unicef. Global, regional, and national causes of child mortality: an updated systematic analysis for 2010 with time trends since 2000. *Lancet*. 2012;379(9832):2151-61.
3. Liu L, Oza S, Hogan D, Perin J, Rudan I, Lawn JE, Cousens S, Mathers C, Black RE. Global, regional, and national causes of child mortality in 2000-13, with projections to inform post-2015 priorities: an updated systematic analysis. *Lancet*. 2015;385(9966):430-40.
4. Marlow N, Wolke D, Bracewell MA, Samara M, Group EPS. Neurologic and developmental disability at six years of age after extremely preterm birth. *N Engl J Med*. 2005;352(1):9-19.
5. Mwaniki MK, Atieno M, Lawn JE, Newton CR. Long-term neurodevelopmental outcomes after intrauterine and neonatal insults: a systematic review. *Lancet*. 2012;379(9814):445-52.
6. van Zijl MD, Koullali B, Mol BW, Pajkrt E, Oudijk MA. Prevention of preterm delivery: current challenges and future prospects. *Int J Womens Health*. 2016;8:633-45.
7. van der Ven J, van Os MA, Kazemier BM, Kleinrouweler E, Verhoeven CJ, de Miranda E, van Wassenaer-Leemhuis AG, Kuiper PN, Porath M, Willekes C, Woiski MD, Sikkema MJ, Roumen FJ, Bossuyt PM, Haak MC, de Groot CJ, Mol BW, Pajkrt E. The capacity of mid-pregnancy cervical length to predict preterm birth in low-risk women: a national cohort study. *Acta Obstet Gynecol Scand*. 2015;94(11):1223-34.
8. Iams JD, Berghella V. Care for women with prior preterm birth. *Am J Obstet Gynecol*. 2010;203(2):89-100.
9. Conner SN, Frey HA, Cahill AG, Macones GA, Colditz GA, Tuuli MG. Loop electrosurgical excision procedure and risk of preterm birth: a systematic review and meta-analysis. *Obstet Gynecol*. 2014;123(4):752-61.
10. Kazemier BM, Buijs PE, Mignini L, Limpens J, de Groot CJ, Mol BW, Ebm C. Impact of obstetric history on the risk of spontaneous preterm birth in singleton and multiple pregnancies: a systematic review. *BJOG*. 2014;121(10):1197-208; discussion 209.
11. Hughes K, Kane SC, Araujo Junior E, Da Silva Costa F, Sheehan PM. Cervical length as a predictor for spontaneous preterm birth in high-risk singleton pregnancy: current knowledge. *Ultrasound Obstet Gynecol*. 2016;48(1):7-15.
12. Vis JY, van Baaren GJ, Wilms FF, Oudijk MA, Kwee A, Porath MM, Scheepers HC, Spaanderman ME, Bloemenkamp KW, van Lith JM, Bolte AC, Bax CJ, Cornette J, Duvetkot JJ, Nij Bijvank SW, van Eyck

- 1  
2  
3 J, Franssen MT, Sollie KM, Woiski M, Vandenbussche FP, van der Post JA, Bossuyt PM, Opmeer BC, Mol  
4 BW. Randomized comparison of nifedipine and placebo in fibronectin-negative women with symptoms  
5 of preterm labor and a short cervix (APOSTEL-I Trial). *Am J Perinatol*. 2015;32(5):451-60.
- 6 13. Wilms FF, Vis JY, de Wit-Zuurendonk L, Porath MM, Mol BW. What is the risk of preterm  
7 delivery after arrested preterm labor? *Am J Perinatol*. 2015;32(1):63-70.
- 8 14. Cornelissen LGH, van Oostrum NHM, van der Woude DAA, Rolf C, Porath MM, Oei SG, van Laar  
9 J. The diagnostic value of fetal fibronectin testing in clinical practice. *J Obstet Gynaecol Res*.  
10 2020;46(3):405-12.
- 11 15. Berghella V, Saccone G. Fetal fibronectin testing for reducing the risk of preterm birth.  
12 *Cochrane Database Syst Rev*. 2019;7:CD006843.
- 13 16. Mazza E, Parra-Saavedra M, Bajka M, Gratacos E, Nicolaidis K, Deprest J. In vivo assessment of  
14 the biomechanical properties of the uterine cervix in pregnancy. *Prenat Diagn*. 2014;34(1):33-41.
- 15 17. Badir S, Bajka M, Mazza E. A novel procedure for the mechanical characterization of the uterine  
16 cervix during pregnancy. *J Mech Behav Biomed Mater*. 2013;27:143-53.
- 17 18. Badir S, Mazza E, Zimmermann R, Bajka M. Cervical softening occurs early in pregnancy:  
18 characterization of cervical stiffness in 100 healthy women using the aspiration technique. *Prenat*  
19 *Diagn*. 2013;33(8):737-41.
- 20 19. Parra-Saavedra M, Gomez L, Barrero A, Parra G, Vergara F, Navarro E. Prediction of preterm  
21 birth using the cervical consistency index. *Ultrasound Obstet Gynecol*. 2011;38(1):44-51.
- 22 20. Kagan KO, Sonek J. How to measure cervical length. *Ultrasound Obstet Gynecol*.  
23 2015;45(3):358-62.
- 24 21. Vis JY, Van Baaren GJ, Wilms FF, Oudijk MA, Kwee A, Porath MM, Scheepers HC, Spaanderman  
25 ME, Bloemenkamp KW, Van Lith JM, Bolte AC, Bax CJ, Cornette J, Duvekot JJ, Nij Bijvank SW, Van Eyck  
26 J, Franssen MT, Sollie KM, Woiski M, Vandenbussche FP, Van Der Post JA, Bossuyt PM, Opmeer BC,  
27 Mol BW. Randomized comparison of nifedipine and placebo in fibronectin-negative women with  
28 symptoms of preterm labor and a short cervix (APOSTEL-I Trial). *American Journal of Perinatology*.  
29 2015;32(5):451-9.
- 30 22. van Baaren GJ, Vis JY, Wilms FF, Oudijk MA, Kwee A, Porath MM, Scheepers HCJ, Spaanderman  
31 MEA, Bloemenkamp KWM, Haak MC, Bax CJ, Cornette JMJ, Duvekot JJ, Nij Bijvanck BWA, van Eyck J,  
32 Franssen MTM, Sollie KM, Vandenbussche F, Woiski M, Bolte AC, van der Post JAM, Bossuyt PMM,  
33 Opmeer BC, Mol BWJ. Cost-effectiveness of diagnostic testing strategies including cervical-length  
34 measurement and fibronectin testing in women with symptoms of preterm labor. *Ultrasound Obstet*  
35 *Gynecol*. 2018;51(5):596-603.
- 36 23. Watson HA, Carter J, Seed PT, Tribe RM, Shennan AH. The QUIPP App: a safe alternative to a  
37 treat-all strategy for threatened preterm labor. *Ultrasound Obstet Gynecol*. 2017;50(3):342-6.
- 38 24. Watson HA, Seed PT, Carter J, Hezelgrave NL, Kuhrt K, Tribe RM, Shennan AH. Development  
39 and validation of predictive models for QUIPP App v.2: tool for predicting preterm birth in  
40 asymptomatic high-risk women. *Ultrasound Obstet Gynecol*. 2020;55(3):348-56.
- 41 25. Goodfellow L, Care A, Sharp A, Ivandic J, Poljak B, Roberts D, Alfirevic Z. Effect of QUIPP  
42 prediction algorithm on treatment decisions in women with a previous preterm birth: a prospective  
43 cohort study. *BJOG*. 2019;126(13):1569-75.
- 44 26. Riley RD, Ensor J, Snell KIE, Harrell FE, Jr., Martin GP, Reitsma JB, Moons KGM, Collins G, van  
45 Smeden M. Calculating the sample size required for developing a clinical prediction model. *BMJ*.  
46 2020;368:m441.
- 47  
48  
49  
50  
51  
52  
53  
54  
55  
56  
57  
58  
59  
60

**Authors contributions**

SB wrote the proposal and the manuscript. FH initiated the research, designed the study, and revised the proposal and manuscript. MO, RE, MB and EP critically revised the proposal and manuscript. All authors read and approved the final manuscript.

**Funding statement**

This work was supported and funded by the Pregnolia institute. They also provided the system and the probes. The funders had no role in design and conduct of the study, collection, management, analysis and interpretation of the data. Also, the funder had no role in preparation, reviewing or approval of the manuscript.

Funding was not provided by the trial sponsor.

**Competing interests**

None declared

**Word count**

2549 words

**Table 1:**

Sample size A-STIPP cohort

| Number of predictors (n)         | 1   | 2   | 3   | 4   | 5   | 6   | 7   | 8   | 9    | 10   | 11   | 12   | 13   | 14   | 15   |
|----------------------------------|-----|-----|-----|-----|-----|-----|-----|-----|------|------|------|------|------|------|------|
| Minimum required sample size (n) | 227 | 240 | 360 | 480 | 600 | 720 | 840 | 960 | 1080 | 1200 | 1320 | 1440 | 1560 | 1680 | 1799 |

For peer review only



**Table 2:**

Sample size S-STIPP cohort

| Number of predictors (n)         | 1   | 2   | 3   | 4   | 5   | 6   | 7   | 8   | 9   | 10  | 11  | 12  | 13  | 14  | 15  |
|----------------------------------|-----|-----|-----|-----|-----|-----|-----|-----|-----|-----|-----|-----|-----|-----|-----|
| Minimum required sample size (n) | 163 | 163 | 163 | 163 | 188 | 225 | 263 | 300 | 338 | 375 | 413 | 450 | 488 | 525 | 563 |

For peer review only

**Table 3**

Predictor variable

|    | <b>Predictor variable</b>            |
|----|--------------------------------------|
| 1  | Cervical length                      |
| 2  | Fetal Fibronectin <sup>#</sup>       |
| 3  | Twin gestation                       |
| 4  | History of spontaneous preterm birth |
| 5  | Cervical Surgery                     |
| 6  | Interpregnancy interval              |
| 7  | Presence of infection                |
| 8  | Family history                       |
| 9  | Social economic status               |
| 10 | Smoking                              |
| 11 | BMI                                  |

# S-STIPP only

**Figure 1:** Illustration of the cervical weakness measurement

For peer review only

1  
2  
3  
4  
5  
6  
7  
8  
9  
10  
11  
12  
13  
14  
15  
16  
17  
18  
19  
20  
21  
22  
23  
24  
25  
26  
27  
28  
29  
30  
31  
32  
33  
34

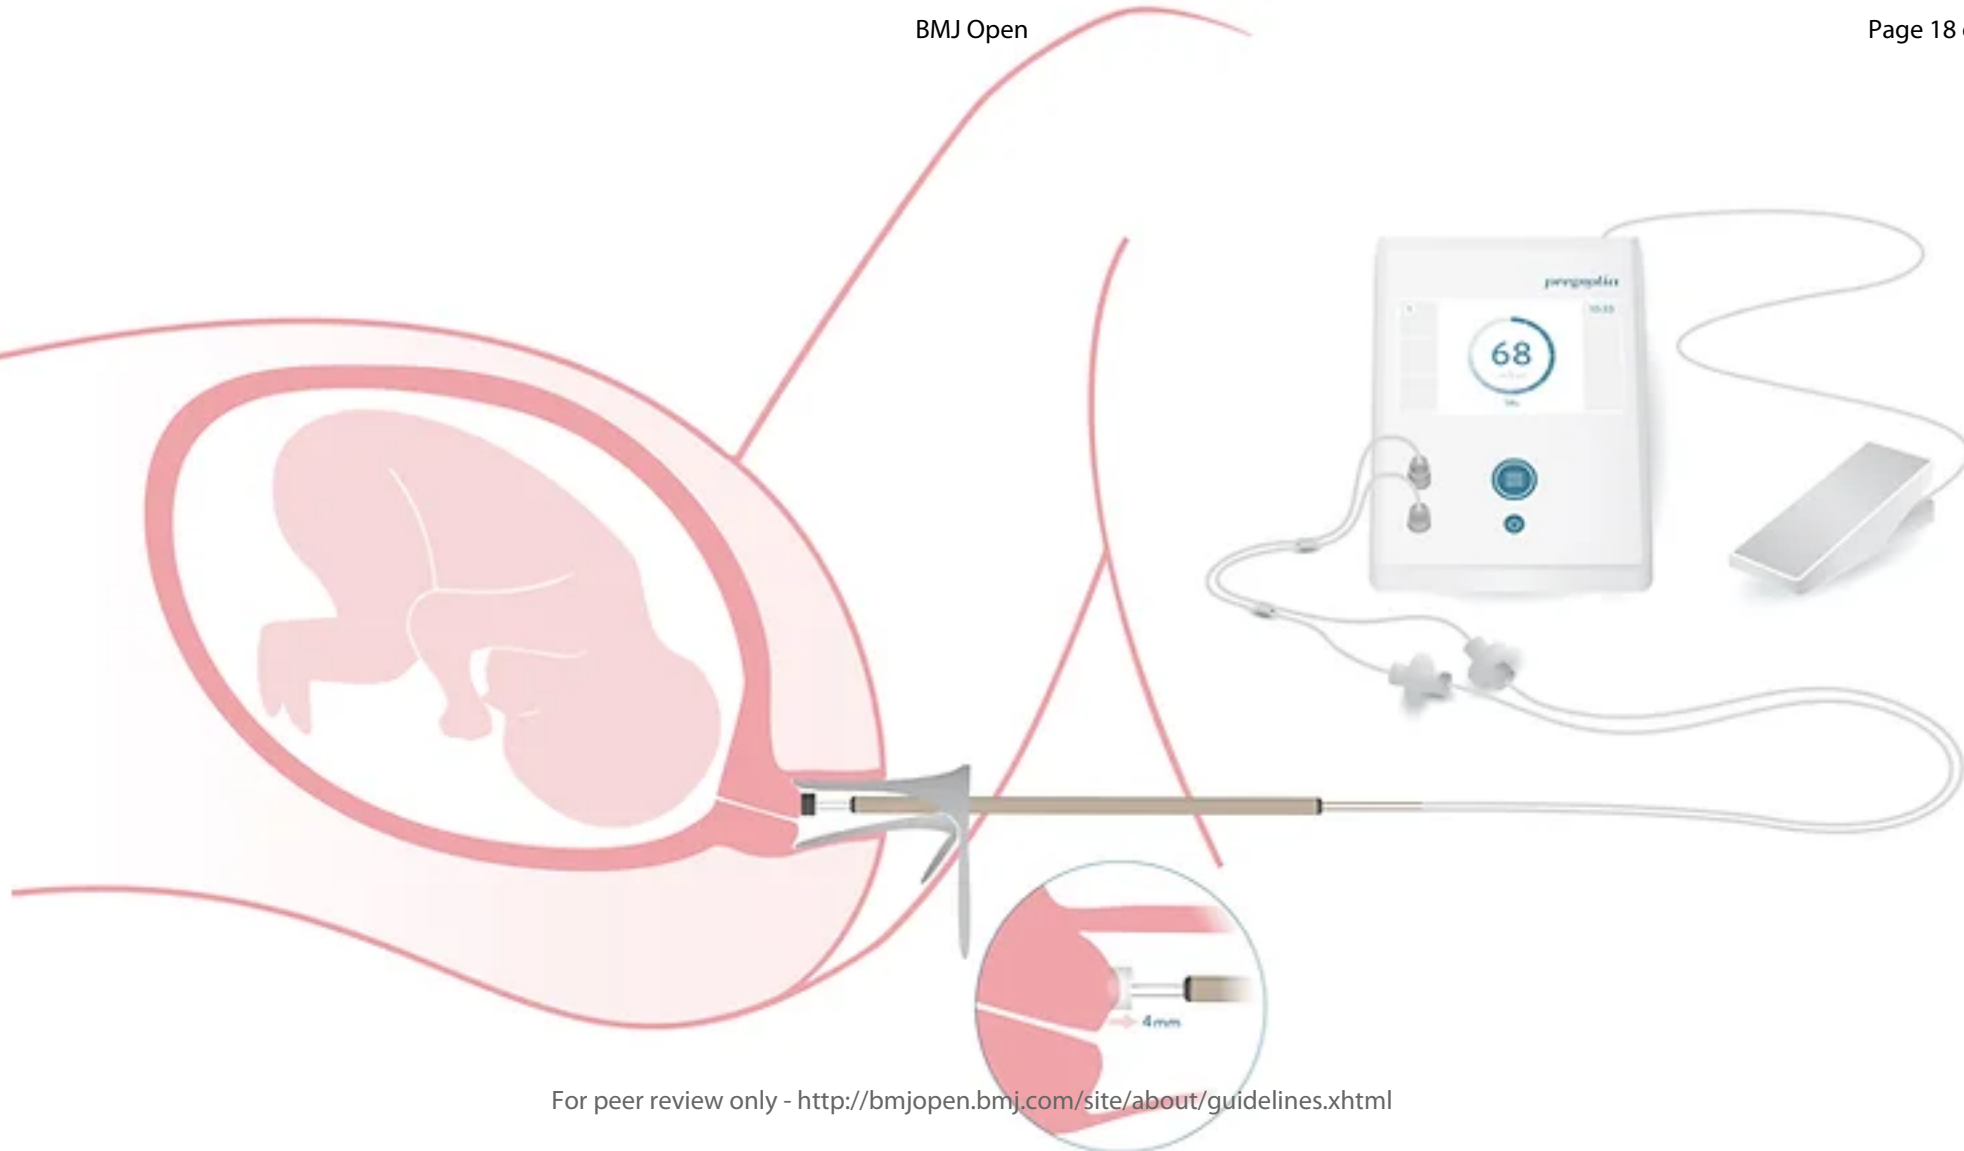

## Appendix 1: Timeline of study procedures

### Timeline A-STIPP cohort

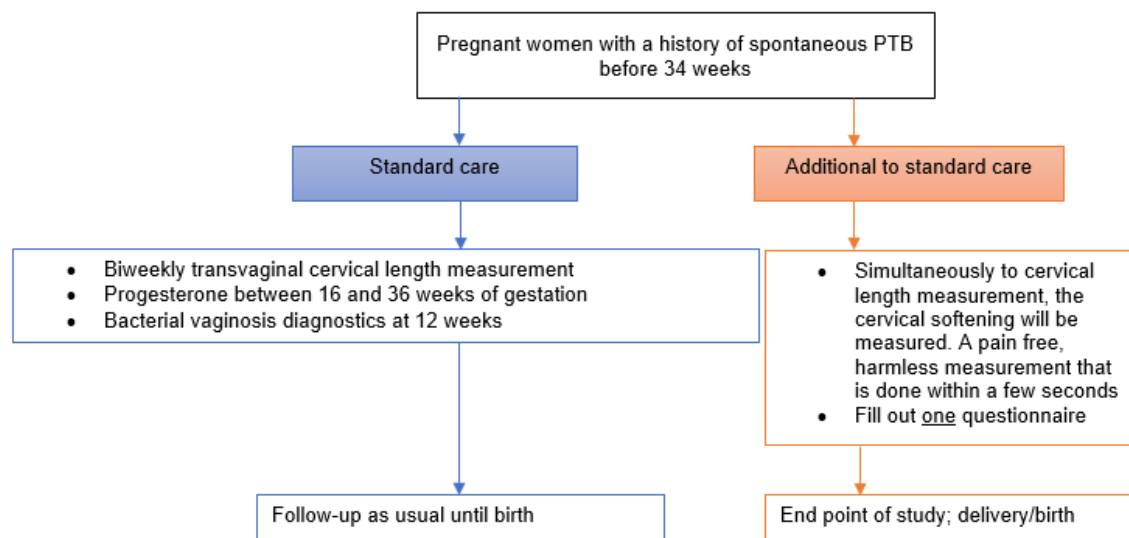

### Timeline S-STIPP cohort

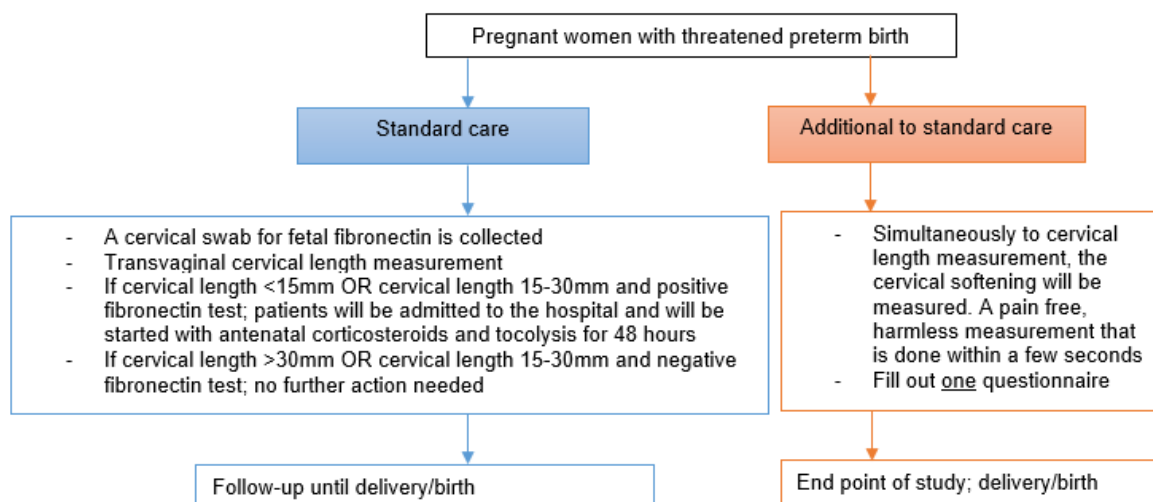

## Appendix 2: safety parameters of the Pregnolia System

- Vaginal or cervical blood loss (directly after measurement)
- Patient discomfort or dissatisfaction during Pregnolia® measurement(scaled 0 to 10)
- Preterm Prelabour Rupture Of Membranes (PPROM) (directly after measurement)
- Preterm labour (directly after measurement)
- Infections within seven days of measurement (Urinary Tract Infections, Vaginal infections, Intra-uterine infections)
- Irritation and sensitization of mucosal tissue
- Infection of the vaginal or mucosal tissue
- Tissue abrasion and vaginal discharge
- Spotting, light bleeding
- Superficial lacerations or minor tissue abrasions

# Reporting checklist for protocol of a clinical trial.

Based on the SPIRIT guidelines.

## Instructions to authors

Complete this checklist by entering the page numbers from your manuscript where readers will find each of the items listed below.

Your article may not currently address all the items on the checklist. Please modify your text to include the missing information. If you are certain that an item does not apply, please write "n/a" and provide a short explanation.

Upload your completed checklist as an extra file when you submit to a journal.

In your methods section, say that you used the SPIRIT reporting guidelines, and cite them as:

Chan A-W, Tetzlaff JM, Gøtzsche PC, Altman DG, Mann H, Berlin J, Dickersin K, Hróbjartsson A, Schulz KF, Parulekar WR, Krleža-Jerić K, Laupacis A, Moher D. SPIRIT 2013 Explanation and Elaboration: Guidance for protocols of clinical trials. *BMJ*. 2013;346:e7586

|                                   |                                                                                                                                 | Page   |
|-----------------------------------|---------------------------------------------------------------------------------------------------------------------------------|--------|
|                                   | Reporting Item                                                                                                                  | Number |
| <b>Administrative information</b> |                                                                                                                                 |        |
| Title                             | <a href="#">#1</a> Descriptive title identifying the study design, population, interventions, and, if applicable, trial acronym | 1      |

|    |                     |                     |                                                            |           |
|----|---------------------|---------------------|------------------------------------------------------------|-----------|
| 1  | Trial registration  | <a href="#">#2a</a> | Trial identifier and registry name. If not yet registered, | 2         |
| 2  |                     |                     | name of intended registry                                  |           |
| 3  |                     |                     |                                                            |           |
| 4  |                     |                     |                                                            |           |
| 5  |                     |                     |                                                            |           |
| 6  | Trial registration: | <a href="#">#2b</a> | All items from the World Health Organization Trial         | Abstract/ |
| 7  | data set            |                     | Registration Data Set                                      | protocol  |
| 8  |                     |                     |                                                            |           |
| 9  |                     |                     |                                                            |           |
| 10 |                     |                     |                                                            |           |
| 11 | Protocol version    | <a href="#">#3</a>  | Date and version identifier                                | 2         |
| 12 |                     |                     |                                                            |           |
| 13 |                     |                     |                                                            |           |
| 14 |                     |                     |                                                            |           |
| 15 | Funding             | <a href="#">#4</a>  | Sources and types of financial, material, and other        | 13        |
| 16 |                     |                     | support                                                    |           |
| 17 |                     |                     |                                                            |           |
| 18 |                     |                     |                                                            |           |
| 19 |                     |                     |                                                            |           |
| 20 | Roles and           | <a href="#">#5a</a> | Names, affiliations, and roles of protocol contributors    | 1         |
| 21 | responsibilities:   |                     |                                                            |           |
| 22 |                     |                     |                                                            |           |
| 23 | contributorship     |                     |                                                            |           |
| 24 |                     |                     |                                                            |           |
| 25 |                     |                     |                                                            |           |
| 26 |                     |                     |                                                            |           |
| 27 |                     |                     |                                                            |           |
| 28 | Roles and           | <a href="#">#5b</a> | Name and contact information for the trial sponsor         | 1         |
| 29 | responsibilities:   |                     |                                                            |           |
| 30 |                     |                     |                                                            |           |
| 31 | sponsor contact     |                     |                                                            |           |
| 32 |                     |                     |                                                            |           |
| 33 | information         |                     |                                                            |           |
| 34 |                     |                     |                                                            |           |
| 35 |                     |                     |                                                            |           |
| 36 |                     |                     |                                                            |           |
| 37 |                     |                     |                                                            |           |
| 38 | Roles and           | <a href="#">#5c</a> | Role of study sponsor and funders, if any, in study        | 13        |
| 39 | responsibilities:   |                     | design; collection, management, analysis, and              |           |
| 40 |                     |                     | interpretation of data; writing of the report; and the     |           |
| 41 | sponsor and funder  |                     | decision to submit the report for publication, including   |           |
| 42 |                     |                     | whether they will have ultimate authority over any of      |           |
| 43 |                     |                     | these activities                                           |           |
| 44 |                     |                     |                                                            |           |
| 45 |                     |                     |                                                            |           |
| 46 |                     |                     |                                                            |           |
| 47 |                     |                     |                                                            |           |
| 48 |                     |                     |                                                            |           |
| 49 |                     |                     |                                                            |           |
| 50 |                     |                     |                                                            |           |
| 51 |                     |                     |                                                            |           |
| 52 | Roles and           | <a href="#">#5d</a> | Composition, roles, and responsibilities of the            | NA        |
| 53 | responsibilities:   |                     | coordinating centre, steering committee, endpoint          |           |
| 54 |                     |                     | adjudication committee, data management team, and          |           |
| 55 | committees          |                     |                                                            |           |
| 56 |                     |                     |                                                            |           |
| 57 |                     |                     |                                                            |           |
| 58 |                     |                     |                                                            |           |
| 59 |                     |                     |                                                            |           |
| 60 |                     |                     |                                                            |           |



other individuals or groups overseeing the trial, if applicable (see Item 21a for data monitoring committee)

## Introduction

Background and rationale [#6a](#) Description of research question and justification for undertaking the trial, including summary of relevant studies (published and unpublished) examining benefits and harms for each intervention 3

Background and rationale: choice of comparators [#6b](#) Explanation for choice of comparators 3

Objectives [#7](#) Specific objectives or hypotheses 5

Trial design [#8](#) Description of trial design including type of trial (eg, parallel group, crossover, factorial, single group), allocation ratio, and framework (eg, superiority, equivalence, non-inferiority, exploratory) 5

## Methods:

Participants, interventions, and outcomes

Study setting [#9](#) Description of study settings (eg, community clinic, academic hospital) and list of countries where data will be collected. Reference to where list of study sites can be obtained 5

|    |                      |                      |                                                            |    |
|----|----------------------|----------------------|------------------------------------------------------------|----|
| 1  | Eligibility criteria | <a href="#">#10</a>  | Inclusion and exclusion criteria for participants. If      | 6  |
| 2  |                      |                      |                                                            |    |
| 3  |                      |                      |                                                            |    |
| 4  |                      |                      | applicable, eligibility criteria for study centres and     |    |
| 5  |                      |                      |                                                            |    |
| 6  |                      |                      | individuals who will perform the interventions (eg,        |    |
| 7  |                      |                      |                                                            |    |
| 8  |                      |                      | surgeons, psychotherapists)                                |    |
| 9  |                      |                      |                                                            |    |
| 10 |                      |                      |                                                            |    |
| 11 | Interventions:       | <a href="#">#11a</a> | Interventions for each group with sufficient detail to     | 6  |
| 12 |                      |                      |                                                            |    |
| 13 | description          |                      | allow replication, including how and when they will be     |    |
| 14 |                      |                      |                                                            |    |
| 15 |                      |                      |                                                            |    |
| 16 |                      |                      | administered                                               |    |
| 17 |                      |                      |                                                            |    |
| 18 |                      |                      |                                                            |    |
| 19 | Interventions:       | <a href="#">#11b</a> | Criteria for discontinuing or modifying allocated          | NA |
| 20 |                      |                      |                                                            |    |
| 21 | modifications        |                      | interventions for a given trial participant (eg, drug dose |    |
| 22 |                      |                      |                                                            |    |
| 23 |                      |                      | change in response to harms, participant request, or       |    |
| 24 |                      |                      |                                                            |    |
| 25 |                      |                      | improving / worsening disease)                             |    |
| 26 |                      |                      |                                                            |    |
| 27 |                      |                      |                                                            |    |
| 28 |                      |                      |                                                            |    |
| 29 | Interventions:       | <a href="#">#11c</a> | Strategies to improve adherence to intervention            | NA |
| 30 |                      |                      |                                                            |    |
| 31 | adherence            |                      | protocols, and any procedures for monitoring adherence     |    |
| 32 |                      |                      |                                                            |    |
| 33 |                      |                      | (eg, drug tablet return; laboratory tests)                 |    |
| 34 |                      |                      |                                                            |    |
| 35 |                      |                      |                                                            |    |
| 36 | Interventions:       | <a href="#">#11d</a> | Relevant concomitant care and interventions that are       | 7  |
| 37 |                      |                      |                                                            |    |
| 38 | concomitant care     |                      | permitted or prohibited during the trial                   |    |
| 39 |                      |                      |                                                            |    |
| 40 |                      |                      |                                                            |    |
| 41 |                      |                      |                                                            |    |
| 42 | Outcomes             | <a href="#">#12</a>  | Primary, secondary, and other outcomes, including the      | 8  |
| 43 |                      |                      |                                                            |    |
| 44 |                      |                      | specific measurement variable (eg, systolic blood          |    |
| 45 |                      |                      |                                                            |    |
| 46 |                      |                      | pressure), analysis metric (eg, change from baseline,      |    |
| 47 |                      |                      |                                                            |    |
| 48 |                      |                      | final value, time to event), method of aggregation (eg,    |    |
| 49 |                      |                      |                                                            |    |
| 50 |                      |                      | median, proportion), and time point for each outcome.      |    |
| 51 |                      |                      |                                                            |    |
| 52 |                      |                      |                                                            |    |
| 53 |                      |                      | Explanation of the clinical relevance of chosen efficacy   |    |
| 54 |                      |                      |                                                            |    |
| 55 |                      |                      | and harm outcomes is strongly recommended                  |    |
| 56 |                      |                      |                                                            |    |
| 57 |                      |                      |                                                            |    |
| 58 |                      |                      |                                                            |    |
| 59 |                      |                      |                                                            |    |
| 60 |                      |                      |                                                            |    |

|    |                           |                      |                                                           |          |
|----|---------------------------|----------------------|-----------------------------------------------------------|----------|
| 1  | Participant timeline      | <a href="#">#13</a>  | Time schedule of enrolment, interventions (including any  | Appendix |
| 2  |                           |                      | run-ins and washouts), assessments, and visits for        | 1        |
| 3  |                           |                      | participants. A schematic diagram is highly               |          |
| 4  |                           |                      | recommended (see Figure)                                  |          |
| 5  |                           |                      |                                                           |          |
| 6  |                           |                      |                                                           |          |
| 7  |                           |                      |                                                           |          |
| 8  |                           |                      |                                                           |          |
| 9  |                           |                      |                                                           |          |
| 10 |                           |                      |                                                           |          |
| 11 | Sample size               | <a href="#">#14</a>  | Estimated number of participants needed to achieve        | 9        |
| 12 |                           |                      | study objectives and how it was determined, including     |          |
| 13 |                           |                      | clinical and statistical assumptions supporting any       |          |
| 14 |                           |                      | sample size calculations                                  |          |
| 15 |                           |                      |                                                           |          |
| 16 |                           |                      |                                                           |          |
| 17 |                           |                      |                                                           |          |
| 18 |                           |                      |                                                           |          |
| 19 |                           |                      |                                                           |          |
| 20 |                           |                      |                                                           |          |
| 21 | Recruitment               | <a href="#">#15</a>  | Strategies for achieving adequate participant enrolment   | NA       |
| 22 |                           |                      | to reach target sample size                               |          |
| 23 |                           |                      |                                                           |          |
| 24 |                           |                      |                                                           |          |
| 25 |                           |                      |                                                           |          |
| 26 | <b>Methods:</b>           |                      |                                                           |          |
| 27 |                           |                      |                                                           |          |
| 28 | <b>Assignment of</b>      |                      |                                                           |          |
| 29 | <b>interventions (for</b> |                      |                                                           |          |
| 30 | <b>controlled trials)</b> |                      |                                                           |          |
| 31 |                           |                      |                                                           |          |
| 32 |                           |                      |                                                           |          |
| 33 |                           |                      |                                                           |          |
| 34 |                           |                      |                                                           |          |
| 35 |                           |                      |                                                           |          |
| 36 | Allocation: sequence      | <a href="#">#16a</a> | Method of generating the allocation sequence (eg,         | NA       |
| 37 | generation                |                      | computer-generated random numbers), and list of any       |          |
| 38 |                           |                      | factors for stratification. To reduce predictability of a |          |
| 39 |                           |                      | random sequence, details of any planned restriction (eg,  |          |
| 40 |                           |                      | blocking) should be provided in a separate document       |          |
| 41 |                           |                      | that is unavailable to those who enrol participants or    |          |
| 42 |                           |                      | assign interventions                                      |          |
| 43 |                           |                      |                                                           |          |
| 44 |                           |                      |                                                           |          |
| 45 |                           |                      |                                                           |          |
| 46 |                           |                      |                                                           |          |
| 47 |                           |                      |                                                           |          |
| 48 |                           |                      |                                                           |          |
| 49 |                           |                      |                                                           |          |
| 50 |                           |                      |                                                           |          |
| 51 |                           |                      |                                                           |          |
| 52 |                           |                      |                                                           |          |
| 53 | Allocation                | <a href="#">#16b</a> | Mechanism of implementing the allocation sequence         | NA       |
| 54 | concealment               |                      | (eg, central telephone; sequentially numbered, opaque,    |          |
| 55 | mechanism                 |                      |                                                           |          |
| 56 |                           |                      |                                                           |          |
| 57 |                           |                      |                                                           |          |
| 58 |                           |                      |                                                           |          |
| 59 |                           |                      |                                                           |          |
| 60 |                           |                      |                                                           |          |

sealed envelopes), describing any steps to conceal the sequence until interventions are assigned

Allocation: [#16c](#) Who will generate the allocation sequence, who will enrol participants, and who will assign participants to interventions NA

Blinding (masking) [#17a](#) Who will be blinded after assignment to interventions (eg, trial participants, care providers, outcome assessors, data analysts), and how NA

Blinding (masking): [#17b](#) If blinded, circumstances under which unblinding is permissible, and procedure for revealing a participant's allocated intervention during the trial NA

**Methods: Data collection, management, and analysis**

Data collection plan [#18a](#) Plans for assessment and collection of outcome, baseline, and other trial data, including any related processes to promote data quality (eg, duplicate measurements, training of assessors) and a description of study instruments (eg, questionnaires, laboratory tests) along with their reliability and validity, if known. Reference to where data collection forms can be found, if not in the protocol 7 and 10

|    |                            |                      |                                                             |    |
|----|----------------------------|----------------------|-------------------------------------------------------------|----|
| 1  | Data collection plan:      | <a href="#">#18b</a> | Plans to promote participant retention and complete         | NA |
| 2  |                            |                      |                                                             |    |
| 3  | retention                  |                      | follow-up, including list of any outcome data to be         |    |
| 4  |                            |                      | collected for participants who discontinue or deviate       |    |
| 5  |                            |                      | from intervention protocols                                 |    |
| 6  |                            |                      |                                                             |    |
| 7  |                            |                      |                                                             |    |
| 8  |                            |                      |                                                             |    |
| 9  |                            |                      |                                                             |    |
| 10 |                            |                      |                                                             |    |
| 11 | Data management            | <a href="#">#19</a>  | Plans for data entry, coding, security, and storage,        | 10 |
| 12 |                            |                      | including any related processes to promote data quality     |    |
| 13 |                            |                      | (eg, double data entry; range checks for data values).      |    |
| 14 |                            |                      | Reference to where details of data management               |    |
| 15 |                            |                      | procedures can be found, if not in the protocol             |    |
| 16 |                            |                      |                                                             |    |
| 17 |                            |                      |                                                             |    |
| 18 |                            |                      |                                                             |    |
| 19 |                            |                      |                                                             |    |
| 20 |                            |                      |                                                             |    |
| 21 |                            |                      |                                                             |    |
| 22 |                            |                      |                                                             |    |
| 23 | Statistics: outcomes       | <a href="#">#20a</a> | Statistical methods for analysing primary and secondary     | 10 |
| 24 |                            |                      | outcomes. Reference to where other details of the           |    |
| 25 |                            |                      | statistical analysis plan can be found, if not in the       |    |
| 26 |                            |                      | protocol                                                    |    |
| 27 |                            |                      |                                                             |    |
| 28 |                            |                      |                                                             |    |
| 29 |                            |                      |                                                             |    |
| 30 |                            |                      |                                                             |    |
| 31 |                            |                      |                                                             |    |
| 32 |                            |                      |                                                             |    |
| 33 | Statistics: additional     | <a href="#">#20b</a> | Methods for any additional analyses (eg, subgroup and       | 10 |
| 34 | analyses                   |                      | adjusted analyses)                                          |    |
| 35 |                            |                      |                                                             |    |
| 36 |                            |                      |                                                             |    |
| 37 |                            |                      |                                                             |    |
| 38 |                            |                      |                                                             |    |
| 39 | Statistics: analysis       | <a href="#">#20c</a> | Definition of analysis population relating to protocol non- | NA |
| 40 | population and             |                      | adherence (eg, as randomised analysis), and any             |    |
| 41 | missing data               |                      | statistical methods to handle missing data (eg, multiple    |    |
| 42 |                            |                      | imputation)                                                 |    |
| 43 |                            |                      |                                                             |    |
| 44 |                            |                      |                                                             |    |
| 45 |                            |                      |                                                             |    |
| 46 |                            |                      |                                                             |    |
| 47 |                            |                      |                                                             |    |
| 48 | <b>Methods: Monitoring</b> |                      |                                                             |    |
| 49 |                            |                      |                                                             |    |
| 50 |                            |                      |                                                             |    |
| 51 | Data monitoring:           | <a href="#">#21a</a> | Composition of data monitoring committee (DMC);             | 10 |
| 52 | formal committee           |                      | summary of its role and reporting structure; statement of   |    |
| 53 |                            |                      | whether it is independent from the sponsor and              |    |
| 54 |                            |                      |                                                             |    |
| 55 |                            |                      |                                                             |    |
| 56 |                            |                      |                                                             |    |
| 57 |                            |                      |                                                             |    |
| 58 |                            |                      |                                                             |    |
| 59 |                            |                      |                                                             |    |
| 60 |                            |                      |                                                             |    |

1 competing interests; and reference to where further  
 2 details about its charter can be found, if not in the  
 3 protocol. Alternatively, an explanation of why a DMC is  
 4 not needed  
 5  
 6  
 7  
 8  
 9

|    |                         |                      |                                                              |    |
|----|-------------------------|----------------------|--------------------------------------------------------------|----|
| 10 | <b>Data monitoring:</b> | <a href="#">#21b</a> | Description of any interim analyses and stopping             | NA |
| 11 | <b>interim analysis</b> |                      | guidelines, including who will have access to these          |    |
| 12 |                         |                      | interim results and make the final decision to terminate     |    |
| 13 |                         |                      | the trial                                                    |    |
| 14 |                         |                      |                                                              |    |
| 15 |                         |                      |                                                              |    |
| 16 |                         |                      |                                                              |    |
| 17 |                         |                      |                                                              |    |
| 18 |                         |                      |                                                              |    |
| 19 |                         |                      |                                                              |    |
| 20 | <b>Harms</b>            | <a href="#">#22</a>  | Plans for collecting, assessing, reporting, and managing     | 10 |
| 21 |                         |                      | solicited and spontaneously reported adverse events          |    |
| 22 |                         |                      | and other unintended effects of trial interventions or trial |    |
| 23 |                         |                      | conduct                                                      |    |
| 24 |                         |                      |                                                              |    |
| 25 |                         |                      |                                                              |    |
| 26 |                         |                      |                                                              |    |
| 27 |                         |                      |                                                              |    |
| 28 |                         |                      |                                                              |    |
| 29 |                         |                      |                                                              |    |
| 30 | <b>Auditing</b>         | <a href="#">#23</a>  | Frequency and procedures for auditing trial conduct, if      | NA |
| 31 |                         |                      | any, and whether the process will be independent from        |    |
| 32 |                         |                      | investigators and the sponsor                                |    |
| 33 |                         |                      |                                                              |    |
| 34 |                         |                      |                                                              |    |
| 35 |                         |                      |                                                              |    |
| 36 |                         |                      |                                                              |    |
| 37 |                         |                      |                                                              |    |
| 38 | <b>Ethics and</b>       |                      |                                                              |    |
| 39 | <b>dissemination</b>    |                      |                                                              |    |
| 40 |                         |                      |                                                              |    |
| 41 |                         |                      |                                                              |    |
| 42 |                         |                      |                                                              |    |
| 43 | <b>Research ethics</b>  | <a href="#">#24</a>  | Plans for seeking research ethics committee /                | 11 |
| 44 | <b>approval</b>         |                      | institutional review board (REC / IRB) approval              |    |
| 45 |                         |                      |                                                              |    |
| 46 |                         |                      |                                                              |    |
| 47 |                         |                      |                                                              |    |
| 48 | <b>Protocol</b>         | <a href="#">#25</a>  | Plans for communicating important protocol                   | NA |
| 49 | <b>amendments</b>       |                      | modifications (eg, changes to eligibility criteria,          |    |
| 50 |                         |                      | outcomes, analyses) to relevant parties (eg,                 |    |
| 51 |                         |                      | investigators, REC / IRBs, trial participants, trial         |    |
| 52 |                         |                      | registries, journals, regulators)                            |    |
| 53 |                         |                      |                                                              |    |
| 54 |                         |                      |                                                              |    |
| 55 |                         |                      |                                                              |    |
| 56 |                         |                      |                                                              |    |
| 57 |                         |                      |                                                              |    |
| 58 |                         |                      |                                                              |    |
| 59 |                         |                      |                                                              |    |
| 60 |                         |                      |                                                              |    |

|    |                       |                      |                                                            |    |
|----|-----------------------|----------------------|------------------------------------------------------------|----|
| 1  | Consent or assent     | <a href="#">#26a</a> | Who will obtain informed consent or assent from            | 11 |
| 2  |                       |                      |                                                            |    |
| 3  |                       |                      |                                                            |    |
| 4  |                       |                      | potential trial participants or authorised surrogates, and |    |
| 5  |                       |                      |                                                            |    |
| 6  |                       |                      | how (see Item 32)                                          |    |
| 7  |                       |                      |                                                            |    |
| 8  |                       |                      |                                                            |    |
| 9  | Consent or assent:    | <a href="#">#26b</a> | Additional consent provisions for collection and use of    | NA |
| 10 |                       |                      |                                                            |    |
| 11 | ancillary studies     |                      | participant data and biological specimens in ancillary     |    |
| 12 |                       |                      |                                                            |    |
| 13 |                       |                      | studies, if applicable                                     |    |
| 14 |                       |                      |                                                            |    |
| 15 |                       |                      |                                                            |    |
| 16 | Confidentiality       | <a href="#">#27</a>  | How personal information about potential and enrolled      | 11 |
| 17 |                       |                      |                                                            |    |
| 18 |                       |                      | participants will be collected, shared, and maintained in  |    |
| 19 |                       |                      |                                                            |    |
| 20 |                       |                      | order to protect confidentiality before, during, and after |    |
| 21 |                       |                      |                                                            |    |
| 22 |                       |                      | the trial                                                  |    |
| 23 |                       |                      |                                                            |    |
| 24 |                       |                      |                                                            |    |
| 25 |                       |                      |                                                            |    |
| 26 | Declaration of        | <a href="#">#28</a>  | Financial and other competing interests for principal      | 13 |
| 27 |                       |                      |                                                            |    |
| 28 | interests             |                      | investigators for the overall trial and each study site    |    |
| 29 |                       |                      |                                                            |    |
| 30 |                       |                      |                                                            |    |
| 31 |                       |                      |                                                            |    |
| 32 | Data access           | <a href="#">#29</a>  | Statement of who will have access to the final trial       | 11 |
| 33 |                       |                      |                                                            |    |
| 34 |                       |                      | dataset, and disclosure of contractual agreements that     |    |
| 35 |                       |                      |                                                            |    |
| 36 |                       |                      | limit such access for investigators                        |    |
| 37 |                       |                      |                                                            |    |
| 38 |                       |                      |                                                            |    |
| 39 | Ancillary and post    | <a href="#">#30</a>  | Provisions, if any, for ancillary and post-trial care, and | NA |
| 40 |                       |                      |                                                            |    |
| 41 | trial care            |                      | for compensation to those who suffer harm from trial       |    |
| 42 |                       |                      |                                                            |    |
| 43 |                       |                      | participation                                              |    |
| 44 |                       |                      |                                                            |    |
| 45 |                       |                      |                                                            |    |
| 46 |                       |                      |                                                            |    |
| 47 | Dissemination policy: | <a href="#">#31a</a> | Plans for investigators and sponsor to communicate trial   | 11 |
| 48 |                       |                      |                                                            |    |
| 49 | trial results         |                      | results to participants, healthcare professionals, the     |    |
| 50 |                       |                      |                                                            |    |
| 51 |                       |                      | public, and other relevant groups (eg, via publication,    |    |
| 52 |                       |                      |                                                            |    |
| 53 |                       |                      | reporting in results databases, or other data sharing      |    |
| 54 |                       |                      |                                                            |    |
| 55 |                       |                      | arrangements), including any publication restrictions      |    |
| 56 |                       |                      |                                                            |    |
| 57 |                       |                      |                                                            |    |
| 58 |                       |                      |                                                            |    |
| 59 |                       |                      |                                                            |    |
| 60 |                       |                      |                                                            |    |

1 Dissemination policy: [#31b](#) Authorship eligibility guidelines and any intended use of NA  
 2 authorship professional writers  
 3  
 4  
 5

6 Dissemination policy: [#31c](#) Plans, if any, for granting public access to the full NA  
 7 reproducible protocol, participant-level dataset, and statistical code  
 8 research  
 9  
 10  
 11  
 12

## 13 Appendices

14  
 15  
 16  
 17 Informed consent [#32](#) Model consent form and other related documentation Appendix  
 18 materials given to participants and authorised surrogates 3  
 19  
 20  
 21

22 Biological specimens [#33](#) Plans for collection, laboratory evaluation, and storage NA  
 23 of biological specimens for genetic or molecular analysis  
 24 in the current trial and for future use in ancillary studies,  
 25 if applicable  
 26  
 27  
 28  
 29  
 30  
 31

32  
 33 None The SPIRIT Explanation and Elaboration paper is distributed under the terms of the Creative  
 34 Commons Attribution License CC-BY-NC. This checklist can be completed online using  
 35 <https://www.goodreports.org/>, a tool made by the [EQUATOR Network](#) in collaboration with  
 36 [Penelope.ai](#)  
 37  
 38  
 39  
 40  
 41  
 42  
 43  
 44  
 45  
 46  
 47  
 48  
 49  
 50  
 51  
 52  
 53  
 54  
 55  
 56  
 57  
 58  
 59  
 60



# BMJ Open

## Assessment of cervical Softening and the Prediction of Preterm birth: study protocol of the STIPP study. A prospective cohort study.

|                                 |                                                                                                                                                                                                                                                                                                                                                                                                                                                                                                                                                                                                                                                                                                                                                                                                 |
|---------------------------------|-------------------------------------------------------------------------------------------------------------------------------------------------------------------------------------------------------------------------------------------------------------------------------------------------------------------------------------------------------------------------------------------------------------------------------------------------------------------------------------------------------------------------------------------------------------------------------------------------------------------------------------------------------------------------------------------------------------------------------------------------------------------------------------------------|
| Journal:                        | <i>BMJ Open</i>                                                                                                                                                                                                                                                                                                                                                                                                                                                                                                                                                                                                                                                                                                                                                                                 |
| Manuscript ID                   | bmjopen-2023-071597.R1                                                                                                                                                                                                                                                                                                                                                                                                                                                                                                                                                                                                                                                                                                                                                                          |
| Article Type:                   | Protocol                                                                                                                                                                                                                                                                                                                                                                                                                                                                                                                                                                                                                                                                                                                                                                                        |
| Date Submitted by the Author:   | 30-Aug-2023                                                                                                                                                                                                                                                                                                                                                                                                                                                                                                                                                                                                                                                                                                                                                                                     |
| Complete List of Authors:       | Breuking, Sofie; Amsterdam UMC Locatie AMC, Obstetrics and gynaecology; Amsterdam Reproduction and Development Research Institute<br>Oudijk, Martijn; Amsterdam UMC Locatie VUmc, Obstetrics; Amsterdam Reproduction and Development Research Institute<br>van Eekelen, Rik; Amsterdam Reproduction and Development Research Institute, Obstetrics and Gynaecology<br>de Boer, Marjon; Amsterdam UMC Locatie VUmc, Department of Obstetrics and Gynaecology; Amsterdam Reproduction and Development Research Institute<br>Pajkrt, Eva; Amsterdam UMC Location AMC, Obstetrics and Gynaecology; Amsterdam Reproduction and Development Research Institute<br>Hermans, Frederik; Amsterdam UMC Locatie AMC, Obstetrics and Gynaecology; Amsterdam Reproduction and Development Research Institute |
| <b>Primary Subject Heading</b>: | Obstetrics and gynaecology                                                                                                                                                                                                                                                                                                                                                                                                                                                                                                                                                                                                                                                                                                                                                                      |
| Secondary Subject Heading:      | Obstetrics and gynaecology                                                                                                                                                                                                                                                                                                                                                                                                                                                                                                                                                                                                                                                                                                                                                                      |
| Keywords:                       | Maternal medicine < OBSTETRICS, OBSTETRICS, Prenatal diagnosis < OBSTETRICS                                                                                                                                                                                                                                                                                                                                                                                                                                                                                                                                                                                                                                                                                                                     |
|                                 |                                                                                                                                                                                                                                                                                                                                                                                                                                                                                                                                                                                                                                                                                                                                                                                                 |

SCHOLARONE™  
Manuscripts

1  
2  
3 1 **Assessment of cervical Softening and the Prediction of Preterm birth: study protocol of the**  
4 **STIPP study. A prospective cohort study.**

5 2  
6  
7 3 Sofie. H. Breuking, MD<sup>1, 2, \*</sup> Martijn A. Oudijk, MD, PhD<sup>2,3</sup>, R. van Eekelen<sup>4</sup>, M.A. de Boer, MD,  
8  
9 4 PhD<sup>2,3</sup> Eva. Pajkrt, MD, PhD<sup>1, 2</sup>, Frederik J. R. Hermans, MD PhD<sup>1,2</sup>

10 5 1. Amsterdam UMC location AMC, University of Amsterdam, Obstetrics and Gynaecology,  
11  
12 6 Meibergdreef 9, Amsterdam, The Netherlands

13 7 2. Amsterdam Reproduction and Development Research Institute, The Netherlands

14 8 3. Amsterdam UMC location Vrije Universiteit Amsterdam, Obstetrics and Gynaecology,  
15  
16 9 Boelelaan 1117, Amsterdam, The Netherlands

17 10 4. Obstetrics and Gynaecology, Centre for Reproductive Medicine, Amsterdam Reproduction  
18  
19 11 and Development Research Institute, Amsterdam UMC Location AMC, Amsterdam, The  
20  
21 12 Netherlands

22 13 \* corresponding author

23 14 Correspondence to: s.h.breuking@amsterdamumc.nl

24 15

25 16 **Abstract**

26 17 **Introduction**

27 18 Preterm birth (PTB) is amongst the leading causes of perinatal and childhood morbidity and  
28  
29 19 mortality. Therefore, accurate identification of pregnant women at high risk of PTB is key to  
30  
31 20 enable obstetric healthcare professionals to apply interventions to improve perinatal and  
32  
33 21 childhood outcomes. Serial transvaginal cervical length measurement is used to screen  
34  
35 22 asymptomatic pregnant women with a history of PTB. Cervical length measurement, fetal  
36  
37 23 fibronectin test or a combination of both can be used to identify women at high risk of PTB  
38  
39 24 in women presenting with symptoms of threatened PTB. The predictive capacity of these can  
40  
41 25 be improved.

42 26 Cervical softening is precursor of cervical shortening, effacement and dilatation and could be  
43  
44 27 a new marker to identify women a high risk of PTB. However, the predictive value of cervical  
45  
46 28 softening to predict spontaneous PTB still need to be determined.

47 29 **Methods and analysis**

1  
2  
3 30 This is a single center, prospective cohort study, conducted at Amsterdam University Medical  
4  
5 31 Center in the Netherlands. Cervical softening will be investigated with a non-invasive CE-  
6  
7 32 marked device called the Pregnolia System®. This device has been developed to evaluate  
8  
9 33 consistency of the cervix based on tissue elasticity. Two different cohorts will be investigated.  
10  
11 34 The first cohort includes women with a history of spontaneous PTB <34 weeks. These women  
12  
13 35 undergo biweekly measurement between 14 and 24 weeks of gestation. The second cohort  
14  
15 36 includes women with symptoms of threatened PTB. These women will receive the  
16  
17 37 measurement once on presentation between 24 and 34 weeks of gestation. Primary outcome  
18  
19 38 is spontaneous PTB before 34 weeks for women with a history of PTB and delivery within  
20  
21 39 seven days for women with threatened PTB. The minimum sample size to analyse the primary  
22  
23 40 outcome is 227 women with a history of PTB, and 163 women with symptoms of threatened  
24  
25 41 PTB. Once this number is achieved, the study will be continued to investigate secondary  
26  
27 42 objectives.

### 27 43 **Ethics and dissemination**

28  
29 44 The study is approved by the Medical Ethics Committee of Amsterdam UMC  
30  
31 45 (METC2022.0226). All patients will give oral and written informed consent prior to entry of  
32  
33 46 the study. Results will be disseminated through peer-reviewed journals. This protocol is  
34  
35 47 published before analysis of results is done.

### 36 48 **Study registration**

37  
38 49 Study is registered at ClinicalTrials.gov, identifier NCT05477381, date of registration: 27th July  
39  
40 50 2022.

### 43 52 **Strengths and limitations of the study**

- 44  
45 53 - A strength of this study is that it is organized in a way with minimal interference in daily  
46  
47 54 practice and therefore a high participation rate is expected.  
48  
49 55 - A notable strength of this study is its prospective cohort design, which includes women  
50  
51 56 across a range of all cervical lengths, thereby establishing an internal control group of  
52  
53 57 women with longer cervix lengths within the cohorts.  
54  
55 58 - This is the first study investigating the cervical stiffness index in a population of high  
56  
57 59 risk women for preterm birth and combining the results with other important  
58  
59 60 predictors for preterm birth.

- 1  
2  
3 61 - The is a prospectively cohort study, therefore, we expect less bias than in a  
4  
5 62 retrospective cohort.  
6  
7 63 - A limitation of the study is the single centre design potentially limiting external validity  
8  
9 64 and generalizability.  
10  
11 65

## 12 13 66 **Introduction**

14  
15 67 Spontaneous preterm birth (PTB), defined as delivery before 37 weeks of gestation, is the  
16  
17 68 leading cause of perinatal and neonatal morbidity and mortality(1). Rates of spontaneous PTB  
18  
19 69 appears to be increasing. Annually, 15 million children are born preterm and is directly  
20  
21 70 responsible for the death of one million neonates(2, 3). Neonates who survive PTB are at  
22  
23 71 increased risk for long-term neurologic sequelae and developmental disabilities(4, 5).  
24  
25 72 Identifying pregnant women at risk is important to be able to take precautionary measures,  
26  
27 73 however this is a challenge for obstetric healthcare professionals.  
28

29 74 Important obstetric and gynaecological risk factors for PTB are midtrimester short cervical  
30  
31 75 length, prior cervical surgery and previous spontaneous PTB. (6-9) Women with a history of  
32  
33 76 spontaneous PTB before 34 weeks of gestation are at a 5-fold increased risk of a spontaneous  
34  
35 77 PTB in a subsequent pregnancy compared to women with a previous term birth(10). In  
36  
37 78 addition to vaginal progesterone administration, biweekly cervical length screening is  
38  
39 79 recommended in these women. This can identify women at high risk of a recurrent PTB based  
40  
41 80 on short cervical length that benefit from a vaginal cerclage. However, in women with a  
42  
43 81 previous PTB, the positive predictive value (PPV) of a short cervical length is 34%. (11)  
44  
45 82 Therefore this approach only identifies a proportion of women who will have a recurrent PTB.  
46  
47 83 This calls for additional measurements to identify the group more adequately at risk for  
48  
49 84 recurrent PTB.

50 85 Another group of pregnant women at risk of delivering PTB are women presenting with  
51  
52 86 symptoms of threatened PTB in their current pregnancy. These women can be triaged with  
53  
54 87 transvaginal cervical length measurement and fetal fibronectin(fFN) to identify women with  
55  
56 88 an increased risk of delivery within seven days. Women with a high risk of PTB at less than 32  
57  
58 89 weeks of gestation are admitted to a centre with NICU facilities and treated with antenatal  
59  
60 90 corticosteroids and tocolysis for 48 hours to improve perinatal outcome.(12) This combination

1  
2  
3 91 of markers are characterized by a high negative predictive value (NPV) but a poor PPV. This  
4  
5 92 results in overtreatment and unnecessary healthcare costs. A large proportion of women with  
6  
7 93 symptoms of threatened PTB will not deliver within seven days due to the low PPV, however  
8  
9 94 these women remain at risk for PTB later in pregnancy. (13-15)

10  
11 95 More adequate techniques to assess women at high risk of recurrent PTB or at high risk of  
12  
13 96 delivering in a short time frame when presenting with symptoms of threatened PTB are  
14  
15 97 urgently needed. Therefore, objective measurement of the cervical consistency is a promising  
16  
17 98 technique.

18  
19 99 To maintain pregnancy and deliver at term an appropriate function of the cervix is required.  
20  
21 100 Delivery is preceded by softening and shortening of the cervix.(16) Changes in cervical  
22  
23 101 consistency can be detected from fertilization until delivery. Throughout pregnancy  
24  
25 102 consistency of the cervix changes and will soften when approaching delivery.(17, 18) Softening  
26  
27 103 of the cervix precedes shortening and therefore could be a promising marker to identify an  
28  
29 104 upcoming delivery at an earlier stage.

30  
31 105 Parra-Saavedra *et al.*(19) investigated this phenomenon with transvaginal ultrasound. The  
32  
33 106 cervical consistency was measured by measuring the difference of the anteroposterior cervical  
34  
35 107 diameter before (AP) and after (AP<sup>1</sup>) application of pressure on the cervix with the transvaginal  
36  
37 108 probe. The cervical consistency was then calculated with the following formula: ((AP<sup>1</sup>/AP) \*  
38  
39 109 100) = Cervical consistency index. Cervical consistency had an inverse linear relationship with  
40  
41 110 gestational age. This means that cervical consistency declines, thus becomes softer, during  
42  
43 111 progression of pregnancy and that this phenomenon can be detected in pregnancy. Secondly,  
44  
45 112 it demonstrated also that pregnant women with a more progressive decline in cervical  
46  
47 113 consistency are more likely to have a spontaneous PTB compared to women with physiological  
48  
49 114 decline in cervical consistency.

50 115 Other techniques that show positive result in evaluating cervical softness is by using  
51  
52 116 elastography methods, including strain elastography (SE) and shear wave elastography  
53  
54 117 (SWE)(20). Nonetheless, there are technical considerations that first need to be resolved  
55  
56 118 before elastography can be applied extensively. For example, the results of SE are affected by  
57  
58 119 operator-applied pressure on the cervix, resulting in an inter-observer variability making it less  
59  
60 120 objective and standardized (21, 22). Moreover, for SWE, safety concerns, such as the unknown

1  
2  
3 121 risk of fetal tissues(23), first must be addressed before elastography methods can be applied  
4  
5 122 extensively.

6  
7 123 Recently, a non-invasive technique has been developed to evaluate consistency of the cervix  
8  
9 124 based on tissue elasticity. The Pregnolia®-system is a market available CE-marked device  
10  
11 125 designed to measure cervical stiffness. This system provides quantitative measurements of  
12  
13 126 the cervical consistency based on aspiration technique.

14  
15 127 A prototype has been tested and measurements were carried out in 50 non-pregnant and 50  
16  
17 128 pregnant women(18). The results were in line with the study by Parra-Saavedra *et al.*(19) and  
18  
19 129 showed that with progressing of pregnancy, the cervix softens and this process starts before  
20  
21 130 shortening. Therefore, by measuring the CSI, delivery could be detected earlier compared to  
22  
23 131 conventional shortening of the cervix measured with transvaginal ultrasound.

24  
25 132 Also, a recent study by Stone *et al.*(22) investigated cervical softness before cerclage  
26  
27 133 placement with the Pregnolia®-system. This study demonstrated patients with a ultra-sound  
28  
29 134 indicated cerclage, had significantly softer cervices compared to normal controls. They also  
30  
31 135 stated this aspiration technique is a promising technique for objective and quantitative  
32  
33 136 measurement of cervical softness.

34  
35 137 Since cervical softening is a precursor of cervical shortening, this could be a novel marker to  
36  
37 138 predict spontaneous PTB and contribute to better identification of women with an increased  
38  
39 139 risk of PTB. Also, the predictive value of cervical softening in combination with cervical length  
40  
41 140 could be promising to improve prediction of PTB. However, these hypotheses still must be  
42  
43 141 examined.

44  
45 142 Therefore, the aim of this cohort study is to evaluate the predictive value of the CSI to predict  
46  
47 143 the risk of spontaneous PTB in pregnant women with an increased risk of PTB.

48  
49 144

## 50 51 145 **Methods and analysis**

### 52 53 54 146 **Study design**

55  
56 147 This study is an investigator initiated, single centre prospective cohort study that will be  
57  
58 148 performed at the Amsterdam UMC in the Netherlands. Recruitment started at 18<sup>th</sup> of august  
59  
60 149 2022. We expect a study duration of 3 years to investigate the primary objectives.

1  
2  
3 150 Two cohorts will be investigated:

- 4  
5 151 - Pregnant women with a history of spontaneous PTB before 34 weeks of gestation  
6  
7 152 (Cohort A-STIPP).  
8  
9 153 - Pregnant women presenting with symptoms of threatened PTB between 24 and 34  
10  
11 154 weeks of gestation (Cohort S-STIPP).

12 155 The measurements of cervical stiffness will be performed in addition to standard care(Appendix  
13  
14 156 1), using the aspiration technique-based device named the Pregnolia system device.

### 157 **Participants**

18 158 In order to be eligible to participate in this study, pregnant women must meet all of the  
19  
20 159 following criteria:

- 21  
22 160 - Age 18 years or above.  
23  
24 161 - Ability to understand Dutch or English (both spoken and written).  
25  
26 162 - Ultrasound-based gestational age determined by measurement of crown rump  
27  
28 163 length (CRL), determined between 9 and 11 weeks of gestation.  
29  
30 164 - Singleton and twin pregnancies.

#### 31 A-STIPP cohort

32  
33 166 Pregnant women with an increased risk of PTB based on a medical history of spontaneous PTB  
34  
35 167 before 34 weeks of gestation will be included.

#### 36 S-STIPP cohort

37  
38 169 Pregnant women, with a gestational age between 24 and 34 weeks presenting with symptoms  
39  
40 170 of threatened PTB, such as abdominal pain, vaginal blood loss, contractions or other  
41  
42 171 complaints suggestive for threatened PTB, will be included.  
43

44 172

45  
46 173 A potential subject who meets any of the following criteria will be excluded from participation:

- 47  
48 174 - Signs of intrauterine infection.  
49  
50 175 - Obstetric indication for immediate delivery (advanced labour, cord prolapse,  
51  
52 176 abruption, signs of foetal distress).  
53  
54 177 - Confirmed foetal abnormality.  
55  
56 178 - Confirmed preterm rupture of membranes.  
57  
58 179 - Confirmed vasa / placenta praevia.  
59  
60 180 - Severe vaginal bleeding and light bleeding that cannot be stopped.

- 1  
2  
3 181 - Signs of imminent labour such as advanced dilatation making it impossible to  
4  
5 182 measure the cervix.  
6  
7 183

## 184 **Measurements**

### 185 *Cervical stiffness measurement*

186 The Cervical stiffness index (CSI) will be measured subsequent to measurement of the cervical  
187 length. The Pregnolia System is composed of two components: an active, reusable device and  
188 a disposable single-use sterile probe.

- 189 - The control unit is an active device with a power supply, foot switch, connector cable  
190 and an integrated pump that generates vacuum.
- 191 - The single-use sterile probe is connected to the control unit console through a  
192 connector cable. Air filters on the probe prevent microbiological contamination of the  
193 control unit. This probe is designed to minimise the contact interaction between the  
194 user and the patients during the measurement. The probe tip diameter is 12mm. Each  
195 single-use, disposable probe is packed in a sterile pouch.

196 To perform the measurement, the cervix is visualized with a speculum. The disposable probe  
197 is placed on the anterior lip of the cervix (12 o'clock position). The control will create a weak  
198 vacuum inside the probe that pulls the cervical tissue, very gently and slowly, into the probe  
199 tip by a fixed distance of 4mm. The negative aspiration pressure needed to deform the tissue  
200 is the outcome of the measurement. A high-pressure value corresponds with stiff tissue and a  
201 low pressure corresponds with soft tissue. An overview of the measurement is displayed in  
202 figure 1.  
203

### 204 *Sonographic measurement*

205 Cervical length measurement with transvaginal ultrasound is routine care in both cohorts.

206 The cervical length will be determined as the linear distance between internal and external  
207 cervical os, excluding the endocervical funnel as described by Kagan *et al.* (24)

208 In the A-STIPP cohort, transvaginal ultrasound will be done biweekly from 14 until 24 weeks  
209 of gestation. In case a short cervix is detected at less than 25 mm, a cerclage, or a pessary in  
210 study context, is placed. Afterwards measurement of CSI will not be continued.

211 In the S-STIPP cohort, the transvaginal ultrasound will be performed when a women presents  
212 with any symptom of threatened PTB, between 24 and 34 weeks of gestation.



1  
2  
3 213  
4  
5 214  
6  
7 215  
8  
9 216  
10  
11 217  
12  
13 218  
14  
15 219  
16  
17 220  
18  
19 221  
20  
21 222  
22  
23 223  
24  
25 224  
26  
27 225  
28  
29 226  
30  
31 227  
32  
33 228  
34  
35 229  
36  
37 230  
38  
39 231  
40  
41 232  
42  
43 233  
44  
45 234  
46  
47 235  
48  
49 236  
50  
51 237  
52  
53 238  
54  
55 239  
56  
57 240  
58  
59 241  
60 242

### *Questionnaire*

Participants will be asked to fill out a structured questionnaire to screen for additional risk factors of PTB. The questionnaire contains questions about the current pregnancy and details about previous pregnancies, if applicable. Moreover, details on cervical surgery in the past and family history of PTB are requested. Baseline characteristics such as height, weight and smoking as well as information about medical history, including gynaecological history and uterus malformations, will be collected. The questionnaire will be checked with the patient's electronic file.

For the S-STIPP cohort, participants will be asked about the specific symptoms associated with threatened PTB.

### **Blinding**

For the A-STIPP cohort, clinicians and participants are blinded for the results of the CSI measurement.

In the S-STIPP cohort, the clinician working at the emergency department performs the measurement and therefore making it impossible to blind the treating clinician. The participant however is blinded for the results.

### **Follow-up**

Participants will be followed-up from inclusion until delivery. Detailed information regarding the pregnancy outcomes, including maternal and neonatal outcomes will be gathered.

Also, if applicable, detailed information about hospital admittance during pregnancy will be noted. Moreover, if a participant is admitted due to threatened PTB, received treatments like antenatal corticosteroids, tocolytic medicines, or magnesium sulfate for neonatal neuroprotection will be noted.

### **Primary outcome**

- The primary outcome for the A-STIPP cohort is spontaneous PTB before 34 weeks of gestation.
- The primary outcome for the S-STIPP cohort is delivery within 7 days.

1  
2  
3 245 **Secondary outcomes**

- 4  
5 246 - Spontaneous PTB before 37 weeks of gestation  
6  
7 247 - Spontaneous PTB before 34 weeks of gestation<sup>#</sup>  
8  
9 248 - Spontaneous PTB before 32 weeks of gestation  
10  
11 249 - Spontaneous PTB before 28 weeks of gestation  
12  
13 250 - Latency time (time between inclusion and delivery)  
14  
15 251 - Delivery within 48 hours<sup>#</sup>  
16  
17 252 - Preterm Premature rupture of Membranes (PPROM)

18 253 # S-STIPP only  
19  
20 254

21  
22 255 **Other outcomes**

23  
24  
25 256 Safety of the use of the Pregnolia system (as defined in Appendix 2) will be investigated.

26  
27 257 Also, patient discomfort of the measurement will be evaluated by a general questionnaire.  
28  
29

30 258

31 259 **Power analysis**

32  
33 260 We used contemporary sample size calculations described by *Riley et al.*(25) for developing  
34  
35 261 prediction models, based on three criteria that each provide a sample size to satisfy that  
36  
37 262 criterion, then picking the highest sample size out of the three. The following input parameters  
38  
39 263 are used to calculate the required number of inclusions; 1) expected prevalence of the primary  
40  
41 264 outcome, 2) expected amount of explained variance by the prediction model and 3) number  
42  
43 265 of predictors (input variables).

44 266 For the A-STIPP cohort the prevalence [0.18] was derived from the QUIPP-study (26-28). The  
45  
46 267 standard level of variance [0.15] was used to calculate sample size.

47  
48 268 For the S-STIPP cohort, the prevalence [0.12] and variance [0.45] were derived from the  
49  
50 269 Apostel I study(12, 29). Both studies have comparable patients as the A-STIPP and S-STIPP  
51  
52 270 study.

53 271 To investigate additional input predictors with sufficient power, an increase in sample size is  
54  
55 272 needed. When inclusion of participants continues and the second threshold is reached,  
56  
57 273 another input parameter is added, until the next threshold and so on. The baseline predictors  
58  
59  
60

1  
2  
3 274 used in the first step will be the CSI measurement combined with cervical length measurement  
4  
5 275 in the A-STIPP cohort, and cervical length with fFN in S-STIPP cohort.

6  
7 276 See table 1 and table 2 for the steps and the threshold sample sizes. In both calculations the  
8  
9 277 number of predictors was gradually increased. Continuous variables count as a single input  
10  
11 278 variable, as well as dichotomous input variables. Categorical variables are counted as C-1, thus  
12  
13 279 the number of input variables is the number categories minus one. The additional predictor  
14  
15 280 variables are summarized in table 3.

16 281

17  
18 282 Sample size calculations were performed using R (R: A language and environment for  
19  
20 283 statistical computing. R Foundation for Statistical Computing, Vienna, Austria.  
21  
22 284 URL <https://www.R-project.org/>) with the use of the *pmsampsize* package (25).

23  
24 285 Table 1 and table 2 indicates the number of participants needed. For the A-STIPP, the  
25  
26 286 minimum sample size of 227 patients is required to achieve the primary objective of this study.  
27  
28 287 Once this number is achieved, the study will be continued to investigate secondary objectives.  
29  
30 288 For the S-STIPP, the minimum sample size of 163 patients is required to achieve the primary  
31  
32 289 objective of this study. Once this number is achieved, the study will be continued to  
33  
34 290 investigate secondary objectives, by using the dynamical sample size as explained.

34 291

### 36 292 **Statistical Analysis**

37  
38 293 Baseline characteristics will be calculated used descriptive statistics. Continuous variables will be  
39  
40 294 reported as mean with standard deviation or median with inter quartile range. Categorical  
41  
42 295 variables will be reported as proportions.

43  
44 296 To incorporate repeated measures of CSI from the A-STIPP cohort, a logistic generalized mixed  
45  
46 297 model will be used. As CSI is a continuous outcome, linear and non-linear functions will be  
47  
48 298 compared using restricted cubic splines. A lower Akaike's Information Criterion (AIC) or overall p-  
49  
50 299 value will determine which functional form is chosen.(25) If there is censoring (i.e. loss-to-follow-  
51  
52 300 up), a Cox proportional hazards model for time to delivery including a time-varying covariate for  
53  
54 301 CSI will be used. As a sensitivity analysis, a comparison of either of these models with a joint  
55  
56 302 survival model will be done (combining a Cox model for time to delivery with a linear mixed model  
57  
58 303 for CSI measurements).

1  
2  
3 304 For the S-STIPP cohort, a logistic regression will be used to determine the relationship between  
4  
5 305 input variables and a dichotomous outcome.  
6  
7  
8 306

9  
10 307 **Subgroup analysis**

11  
12 308 Subgroup analysis are planned for participants and treatments that may potentially effect cervical  
13  
14 309 stiffness, in order to assess their impact on the CSI:

- 15  
16  
17 310 - Nulliparous versus multiparous women  
18  
19 311 - Singleton versus multiple pregnancies  
20  
21 312 - Women with previous cervical surgery versus women without  
22  
23 313 - Women with a (abdominal or cervical) cerclage in current pregnancy versus no cerclage  
24  
25 314 - Women treated with progesterone versus no treatment

26  
27 315 *A-STIPP cohort subgroup analysis*

28  
29 316 Subgroup of interest in asymptomatic participants are:

- 30  
31 317 - Women with a short cervix ( $\leq 25\text{mm}$ ) during screening vs. women with a long cervix  
32  
33 318 ( $> 25\text{mm}$ )  
34  
35  
36 319 - Women who received additional treatment (pessary or cerclage) vs. no treatment.  
37

38  
39 320 *S-STIPP cohort subgroup analysis*

40  
41 321 Subgroup of interest in symptomatic participants are performed in groups based on clinical risk  
42  
43 322 stratification:

- 44  
45 323 - Cervical length  $\geq 30\text{mm}$   
46  
47 324 - Cervical length  $\geq 15$  and  $< 30\text{mm}$  with negative fFN  
48  
49 325 - Cervical length  $\geq 15$  and  $< 30\text{mm}$  with positive fFN  
50  
51  
52 326 - Cervical length  $< 15\text{ mm}$   
53  
54

55 327

56  
57 328 **Monitoring and safety**  
58  
59  
60

1  
2  
3 329 An independent Data and Safety Monitoring Board (DSMB) is assigned to safeguard the safety of  
4  
5 330 the study participants and provide recommendations.  
6

7 331 Since the measurement with the PregnoIia-system is minimally invasive, the risk of adverse  
8  
9 332 events(AEs) related to the measurement is small. However, any AEs and Serious Adverse  
10  
11 333 Events (SAEs) will be reported. If evaluation by the DSMB demonstrates increased safety risks  
12  
13 334 within the study, the DSMB can always advice to stop the study.  
14

15 335

### 16 336 **Data management**

17  
18 337 Data will be collected using an accredited electronic data capture system (Castor). To protect the  
19  
20 338 privacy of the participant, personal data is encrypted. Data cannot be traced back to participants  
21  
22 339 in reports and publications about the study. All personal data is protected according to the General  
23  
24 340 Data Protection Regulation (GDPR and Dutch privacy regulation (AVG)).  
25

26 341 All agreements regarding data sharing are defined in a signed Clinical Trial Agreement (CTA), GDPR  
27  
28 342 are applicable to this agreement.  
29

30 343

### 31 344 **Clinical impact**

32  
33 345 This STIPP study will provide evidence on the value of the cervical stiffness as a single clinical  
34  
35 346 marker and in combination with other clinical markers such as cervical length to predict the  
36  
37 347 risk of spontaneous PTB in groups of pregnant women with an increased risk of PTB.  
38  
39 348

### 40 349 **Patient and public involvement**

41  
42 350 The patient organisation care4Neo was informed about the study and was favourable about  
43  
44 351 purpose of the study.  
45

46 352

### 47 353 **Ethics and dissemination**

48  
49 354 The Medical Ethics Committee of the Amsterdam UMC has given approval for this research  
50  
51 355 (Number 2022.0226). All participants will give written and oral informed consent prior to entry  
52  
53 356 to the study and will be made aware participation is completely voluntary. The outcomes of  
54  
55 357 the study will be published in a peer-reviewed journal.  
56  
57 358

58 359

### 59 360 **References**

- 1  
2  
3 360 1. Blencowe H, Cousens S, Oestergaard MZ, Chou D, Moller AB, Narwal R, Adler A, Vera Garcia  
4 361 C, Rohde S, Say L, Lawn JE. National, regional, and worldwide estimates of preterm birth rates in the  
5 362 year 2010 with time trends since 1990 for selected countries: a systematic analysis and implications.  
6 363 *Lancet*. 2012;379(9832):2162-72.
- 7  
8 364 2. Liu L, Johnson HL, Cousens S, Perin J, Scott S, Lawn JE, Rudan I, Campbell H, Cibulskis R, Li M,  
9 365 Mathers C, Black RE, Child Health Epidemiology Reference Group of WHO, Unicef. Global, regional,  
10 366 and national causes of child mortality: an updated systematic analysis for 2010 with time trends since  
11 367 2000. *Lancet*. 2012;379(9832):2151-61.
- 12 368 3. Liu L, Oza S, Hogan D, Perin J, Rudan I, Lawn JE, Cousens S, Mathers C, Black RE. Global,  
13 369 regional, and national causes of child mortality in 2000-13, with projections to inform post-2015  
14 370 priorities: an updated systematic analysis. *Lancet*. 2015;385(9966):430-40.
- 15 371 4. Marlow N, Wolke D, Bracewell MA, Samara M, Group EPS. Neurologic and developmental  
16 372 disability at six years of age after extremely preterm birth. *N Engl J Med*. 2005;352(1):9-19.
- 17 373 5. Mwaniki MK, Atieno M, Lawn JE, Newton CR. Long-term neurodevelopmental outcomes after  
18 374 intrauterine and neonatal insults: a systematic review. *Lancet*. 2012;379(9814):445-52.
- 19 375 6. van Zyl MD, Koullali B, Mol BW, Pajkrt E, Oudijk MA. Prevention of preterm delivery: current  
20 376 challenges and future prospects. *Int J Womens Health*. 2016;8:633-45.
- 21 377 7. van der Ven J, van Os MA, Kazemier BM, Kleinrouweler E, Verhoeven CJ, de Miranda E, van  
22 378 Wassenaer-Leemhuis AG, Kuiper PN, Porath M, Willekes C, Woiski MD, Sikkema MJ, Roumen FJ,  
23 379 Bossuyt PM, Haak MC, de Groot CJ, Mol BW, Pajkrt E. The capacity of mid-pregnancy cervical length  
24 379 to predict preterm birth in low-risk women: a national cohort study. *Acta Obstet Gynecol Scand*.  
25 380 2015;94(11):1223-34.
- 26 381  
27 382 8. Iams JD, Berghella V. Care for women with prior preterm birth. *Am J Obstet Gynecol*.  
28 383 2010;203(2):89-100.
- 29 384 9. Conner SN, Frey HA, Cahill AG, Macones GA, Colditz GA, Tuuli MG. Loop electrosurgical  
30 385 excision procedure and risk of preterm birth: a systematic review and meta-analysis. *Obstet Gynecol*.  
31 386 2014;123(4):752-61.
- 32 387 10. Kazemier BM, Buijs PE, Mignini L, Limpens J, de Groot CJ, Mol BW, Ebm C. Impact of obstetric  
33 388 history on the risk of spontaneous preterm birth in singleton and multiple pregnancies: a systematic  
34 389 review. *BJOG*. 2014;121(10):1197-208; discussion 209.
- 35 390 11. Hughes K, Kane SC, Araujo Junior E, Da Silva Costa F, Sheehan PM. Cervical length as a  
36 391 predictor for spontaneous preterm birth in high-risk singleton pregnancy: current knowledge.  
37 392 *Ultrasound Obstet Gynecol*. 2016;48(1):7-15.
- 38 393 12. Vis JY, van Baaren GJ, Wilms FF, Oudijk MA, Kwee A, Porath MM, Scheepers HC,  
39 394 Spaanderman ME, Bloemenkamp KW, van Lith JM, Bolte AC, Bax CJ, Cornette J, Duvekot JJ, Nij  
40 395 Bijvank SW, van Eyck J, Franssen MT, Sollie KM, Woiski M, Vandenbussche FP, van der Post JA,  
41 396 Bossuyt PM, Opmeer BC, Mol BW. Randomized comparison of nifedipine and placebo in fibronectin-  
42 397 negative women with symptoms of preterm labor and a short cervix (APOSTEL-I Trial). *Am J Perinatol*.  
43 398 2015;32(5):451-60.
- 44 399 13. Wilms FF, Vis JY, de Wit-Zuurendonk L, Porath MM, Mol BW. What is the risk of preterm  
45 400 delivery after arrested preterm labor? *Am J Perinatol*. 2015;32(1):63-70.
- 46 401 14. Cornelissen LGH, van Oostrum NHM, van der Woude DAA, Rolf C, Porath MM, Oei SG, van  
47 402 Laar J. The diagnostic value of fetal fibronectin testing in clinical practice. *J Obstet Gynaecol Res*.  
48 403 2020;46(3):405-12.
- 49 404 15. Berghella V, Saccone G. Fetal fibronectin testing for reducing the risk of preterm birth.  
50 405 *Cochrane Database Syst Rev*. 2019;7:CD006843.
- 51 406 16. Mazza E, Parra-Saavedra M, Bajka M, Gratacos E, Nicolaidis K, Deprest J. In vivo assessment  
52 407 of the biomechanical properties of the uterine cervix in pregnancy. *Prenat Diagn*. 2014;34(1):33-41.
- 53 408 17. Badir S, Bajka M, Mazza E. A novel procedure for the mechanical characterization of the  
54 409 uterine cervix during pregnancy. *J Mech Behav Biomed Mater*. 2013;27:143-53.

- 1  
2  
3 410 18. Badir S, Mazza E, Zimmermann R, Bajka M. Cervical softening occurs early in pregnancy:  
4 411 characterization of cervical stiffness in 100 healthy women using the aspiration technique. *Prenat*  
5 412 *Diagn.* 2013;33(8):737-41.
- 6 413 19. Parra-Saavedra M, Gomez L, Barrero A, Parra G, Vergara F, Navarro E. Prediction of preterm  
7 414 birth using the cervical consistency index. *Ultrasound Obstet Gynecol.* 2011;38(1):44-51.
- 8 415 20. Shiina T, Nightingale KR, Palmeri ML, Hall TJ, Bamber JC, Barr RG, Castera L, Choi BI, Chou YH,  
9 416 Cosgrove D, Dietrich CF, Ding H, Amy D, Farrokh A, Ferraioli G, Filice C, Friedrich-Rust M, Nakashima  
10 417 K, Schafer F, Sporea I, Suzuki S, Wilson S, Kudo M. WFUMB guidelines and recommendations for  
11 418 clinical use of ultrasound elastography: Part 1: basic principles and terminology. *Ultrasound Med Biol.*  
12 419 2015;41(5):1126-47.
- 13 420 21. Ge W, Brooker G, Mogra R, Hyett J. Measured Hyperelastic Properties of Cervical Tissue with  
14 421 Shear-Wave Elastography. *Sensors (Basel).* 2021;22(1).
- 15 422 22. Stone J, House M. Measurement of cervical softness before cerclage placement with an  
16 423 aspiration-based device. *Am J Obstet Gynecol MFM.* 2023;5(4):100881.
- 17 424 23. Issaoui M, Debost-Legrand A, Skerl K, Chauveau B, Magnin B, Delabaere A, Boyer L, Sauvart-  
18 425 Rochat MP, Lemery D. Shear wave elastography safety in fetus: A quantitative health risk  
19 426 assessment. *Diagn Interv Imaging.* 2018;99(9):519-24.
- 20 427 24. Kagan KO, Sonek J. How to measure cervical length. *Ultrasound Obstet Gynecol.*  
21 428 2015;45(3):358-62.
- 22 429 25. Riley RD, Ensor J, Snell KIE, Harrell FE, Jr., Martin GP, Reitsma JB, Moons KGM, Collins G, van  
23 430 Smeden M. Calculating the sample size required for developing a clinical prediction model. *BMJ.*  
24 431 2020;368:m441.
- 25 432 26. Watson HA, Carter J, Seed PT, Tribe RM, Shennan AH. The QUIPP App: a safe alternative to a  
26 433 treat-all strategy for threatened preterm labor. *Ultrasound Obstet Gynecol.* 2017;50(3):342-6.
- 27 434 27. Watson HA, Seed PT, Carter J, Hezelgrave NL, Kuhrt K, Tribe RM, Shennan AH. Development  
28 435 and validation of predictive models for QUIPP App v.2: tool for predicting preterm birth in  
29 436 asymptomatic high-risk women. *Ultrasound Obstet Gynecol.* 2020;55(3):348-56.
- 30 437 28. Goodfellow L, Care A, Sharp A, Ivandic J, Poljak B, Roberts D, Alfirevic Z. Effect of QUIPP  
31 438 prediction algorithm on treatment decisions in women with a previous preterm birth: a prospective  
32 439 cohort study. *BJOG.* 2019;126(13):1569-75.
- 33 440 29. van Baaren GJ, Vis JY, Wilms FF, Oudijk MA, Kwee A, Porath MM, Scheepers HCJ,  
34 441 Spaanderman MEA, Bloemenkamp KWM, Haak MC, Bax CJ, Cornette JMJ, Duvekot JJ, Nij Bijvanck  
35 442 BWA, van Eyck J, Franssen MTM, Sollie KM, Vandenbussche F, Woiski M, Bolte AC, van der Post JAM,  
36 443 Bossuyt PMM, Opmeer BC, Mol BWJ. Cost-effectiveness of diagnostic testing strategies including  
37 444 cervical-length measurement and fibronectin testing in women with symptoms of preterm labor.  
38 445 *Ultrasound Obstet Gynecol.* 2018;51(5):596-603.

446

#### 447 **Authors contributions**

448 FH initiated the research. FH and SB designed the study. SB wrote the proposal and the  
449 manuscript. FH revised the proposal and manuscript. MO, RE, MB and EP critically revised the  
450 proposal and manuscript. All authors read and approved the final manuscript.

451

#### 452 **Funding statement**

453 This work was supported and funded by the Pregnolia institute. They also provided the system  
454 and the probes. The funders had no role in the study design, conduction of the study,

1  
2  
3 455 collection, management, analysis and interpretation of the data. Also, the funder had no role  
4  
5 456 in preparation, reviewing or approval of the manuscript. Funding was not provided by the  
6  
7 457 study sponsor.

8  
9 458

10 459 **Competing interests**

11  
12 460 None declared

13  
14 461

15  
16 462 **Word count**

17  
18 463 2905 words

19  
20  
21  
22  
23  
24  
25  
26  
27  
28  
29  
30  
31  
32  
33  
34  
35  
36  
37  
38  
39  
40  
41  
42  
43  
44  
45  
46  
47  
48  
49  
50  
51  
52  
53  
54  
55  
56  
57  
58  
59  
60

For peer review only



**Table 1:**

Sample size A-STIPP cohort

| Number of predictors (n)         | 1   | 2   | 3   | 4   | 5   | 6   | 7   | 8   | 9    | 10   | 11   | 12   | 13   | 14   | 15   |
|----------------------------------|-----|-----|-----|-----|-----|-----|-----|-----|------|------|------|------|------|------|------|
| Minimum required sample size (n) | 227 | 240 | 360 | 480 | 600 | 720 | 840 | 960 | 1080 | 1200 | 1320 | 1440 | 1560 | 1680 | 1799 |

For peer review only

**Table 2:**

Sample size S-STIPP cohort

| Number of predictors (n)         | 1   | 2   | 3   | 4   | 5   | 6   | 7   | 8   | 9   | 10  | 11  | 12  | 13  | 14  | 15  |
|----------------------------------|-----|-----|-----|-----|-----|-----|-----|-----|-----|-----|-----|-----|-----|-----|-----|
| Minimum required sample size (n) | 163 | 163 | 163 | 163 | 188 | 225 | 263 | 300 | 338 | 375 | 413 | 450 | 488 | 525 | 563 |

For peer review only

**Table 3**

Predictor variable

|    | <b>Predictor variable</b>            |
|----|--------------------------------------|
| 1  | Cervical length                      |
| 2  | Fetal Fibronectin <sup>#</sup>       |
| 3  | Twin gestation                       |
| 4  | History of spontaneous preterm birth |
| 5  | Cervical Surgery                     |
| 6  | Interpregnancy interval              |
| 7  | Presence of infection                |
| 8  | Family history                       |
| 9  | Social economic status               |
| 10 | Smoking                              |
| 11 | BMI                                  |

# S-STIPP only

1  
2  
3  
4  
5  
6  
7  
8  
9  
10  
11  
12  
13  
14  
15  
16  
17  
18  
19  
20  
21  
22  
23  
24  
25  
26  
27  
28  
29  
30  
31  
32  
33  
34  
35  
36  
37  
38  
39  
40  
41  
42  
43  
44  
45  
46  
47  
48  
49  
50  
51  
52  
53  
54  
55  
56  
57  
58  
59  
60

**Figure 1:** Illustration of the cervical softness measurement

For peer review only

1  
2  
3 **Figure 1:** Illustration of an overview of the measurement  
4  
5  
6  
7  
8  
9  
10  
11  
12  
13  
14  
15  
16  
17  
18  
19  
20  
21  
22  
23  
24  
25  
26  
27  
28  
29  
30  
31  
32  
33  
34  
35  
36  
37  
38  
39  
40  
41  
42  
43  
44  
45  
46  
47  
48  
49  
50  
51  
52  
53  
54  
55  
56  
57  
58  
59  
60

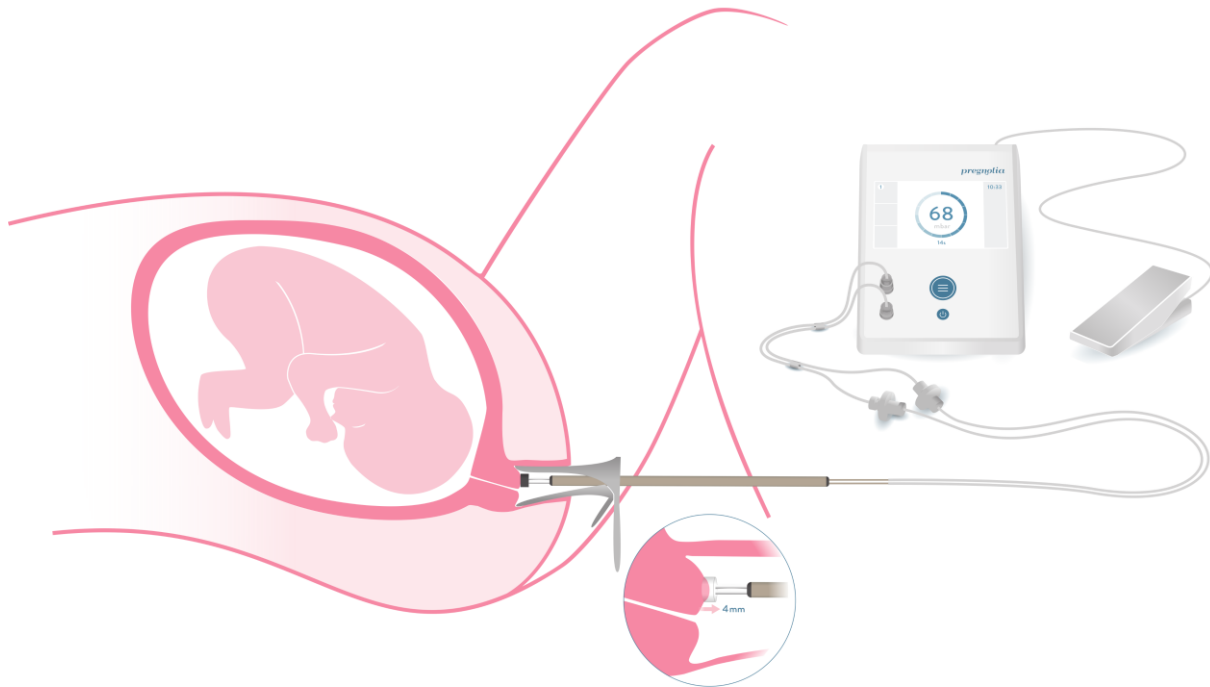

© Copyright 2023 Pregnotica AG. Reproduced with permission.

review only

## Appendix 1: Timeline of study procedures

### Timeline A-STIPP cohort



### Timeline S-STIPP cohort



## Appendix 2: safety parameters of the Pregnolia System

- Vaginal or cervical blood loss (directly after measurement)
- Patient discomfort or dissatisfaction during Pregnolia® measurement(scaled 0 to 10)
- Preterm Prelabour Rupture Of Membranes (PPROM) (directly after measurement)
- Preterm labour (directly after measurement)
- Infections within seven days of measurement (Urinary Tract Infections, Vaginal infections, Intra-uterine infections)
- Irritation and sensitization of mucosal tissue
- Infection of the vaginal or mucosal tissue
- Tissue abrasion and vaginal discharge
- Spotting, light bleeding
- Superficial lacerations or minor tissue abrasions

# Reporting checklist for protocol of a clinical trial.

Based on the SPIRIT guidelines.

## Instructions to authors

Complete this checklist by entering the page numbers from your manuscript where readers will find each of the items listed below.

Your article may not currently address all the items on the checklist. Please modify your text to include the missing information. If you are certain that an item does not apply, please write "n/a" and provide a short explanation.

Upload your completed checklist as an extra file when you submit to a journal.

In your methods section, say that you used the SPIRIT reporting guidelines, and cite them as:

Chan A-W, Tetzlaff JM, Gøtzsche PC, Altman DG, Mann H, Berlin J, Dickersin K, Hróbjartsson A, Schulz KF, Parulekar WR, Krleža-Jerić K, Laupacis A, Moher D. SPIRIT 2013 Explanation and Elaboration: Guidance for protocols of clinical trials. *BMJ*. 2013;346:e7586

|                                   |                                                                                                                                 | Page   |
|-----------------------------------|---------------------------------------------------------------------------------------------------------------------------------|--------|
|                                   | Reporting Item                                                                                                                  | Number |
| <b>Administrative information</b> |                                                                                                                                 |        |
| Title                             | <a href="#">#1</a> Descriptive title identifying the study design, population, interventions, and, if applicable, trial acronym | 1      |



|    |                     |                     |                                                            |           |
|----|---------------------|---------------------|------------------------------------------------------------|-----------|
| 1  | Trial registration  | <a href="#">#2a</a> | Trial identifier and registry name. If not yet registered, | 2         |
| 2  |                     |                     | name of intended registry                                  |           |
| 3  |                     |                     |                                                            |           |
| 4  |                     |                     |                                                            |           |
| 5  |                     |                     |                                                            |           |
| 6  | Trial registration: | <a href="#">#2b</a> | All items from the World Health Organization Trial         | Abstract/ |
| 7  | data set            |                     | Registration Data Set                                      | protocol  |
| 8  |                     |                     |                                                            |           |
| 9  |                     |                     |                                                            |           |
| 10 |                     |                     |                                                            |           |
| 11 | Protocol version    | <a href="#">#3</a>  | Date and version identifier                                | 2         |
| 12 |                     |                     |                                                            |           |
| 13 |                     |                     |                                                            |           |
| 14 |                     |                     |                                                            |           |
| 15 | Funding             | <a href="#">#4</a>  | Sources and types of financial, material, and other        | 14        |
| 16 |                     |                     | support                                                    |           |
| 17 |                     |                     |                                                            |           |
| 18 |                     |                     |                                                            |           |
| 19 |                     |                     |                                                            |           |
| 20 | Roles and           | <a href="#">#5a</a> | Names, affiliations, and roles of protocol contributors    | 1         |
| 21 | responsibilities:   |                     |                                                            |           |
| 22 |                     |                     |                                                            |           |
| 23 | contributorship     |                     |                                                            |           |
| 24 |                     |                     |                                                            |           |
| 25 |                     |                     |                                                            |           |
| 26 |                     |                     |                                                            |           |
| 27 |                     |                     |                                                            |           |
| 28 | Roles and           | <a href="#">#5b</a> | Name and contact information for the trial sponsor         | 1         |
| 29 | responsibilities:   |                     |                                                            |           |
| 30 |                     |                     |                                                            |           |
| 31 | sponsor contact     |                     |                                                            |           |
| 32 |                     |                     |                                                            |           |
| 33 | information         |                     |                                                            |           |
| 34 |                     |                     |                                                            |           |
| 35 |                     |                     |                                                            |           |
| 36 |                     |                     |                                                            |           |
| 37 |                     |                     |                                                            |           |
| 38 | Roles and           | <a href="#">#5c</a> | Role of study sponsor and funders, if any, in study        | 14        |
| 39 | responsibilities:   |                     | design; collection, management, analysis, and              |           |
| 40 |                     |                     | interpretation of data; writing of the report; and the     |           |
| 41 | sponsor and funder  |                     | decision to submit the report for publication, including   |           |
| 42 |                     |                     | whether they will have ultimate authority over any of      |           |
| 43 |                     |                     | these activities                                           |           |
| 44 |                     |                     |                                                            |           |
| 45 |                     |                     |                                                            |           |
| 46 |                     |                     |                                                            |           |
| 47 |                     |                     |                                                            |           |
| 48 |                     |                     |                                                            |           |
| 49 |                     |                     |                                                            |           |
| 50 |                     |                     |                                                            |           |
| 51 |                     |                     |                                                            |           |
| 52 | Roles and           | <a href="#">#5d</a> | Composition, roles, and responsibilities of the            | NA        |
| 53 | responsibilities:   |                     | coordinating centre, steering committee, endpoint          |           |
| 54 |                     |                     | adjudication committee, data management team, and          |           |
| 55 | committees          |                     |                                                            |           |
| 56 |                     |                     |                                                            |           |
| 57 |                     |                     |                                                            |           |
| 58 |                     |                     |                                                            |           |
| 59 |                     |                     |                                                            |           |
| 60 |                     |                     |                                                            |           |

other individuals or groups overseeing the trial, if applicable (see Item 21a for data monitoring committee)

## Introduction

Background and rationale [#6a](#) Description of research question and justification for undertaking the trial, including summary of relevant studies (published and unpublished) examining benefits and harms for each intervention 3

Background and rationale: choice of comparators [#6b](#) Explanation for choice of comparators 3

Objectives [#7](#) Specific objectives or hypotheses 5

Trial design [#8](#) Description of trial design including type of trial (eg, parallel group, crossover, factorial, single group), allocation ratio, and framework (eg, superiority, equivalence, non-inferiority, exploratory) 5

## Methods:

Participants, interventions, and outcomes

Study setting [#9](#) Description of study settings (eg, community clinic, academic hospital) and list of countries where data will be collected. Reference to where list of study sites can be obtained 5

|    |                      |                      |                                                            |     |
|----|----------------------|----------------------|------------------------------------------------------------|-----|
| 1  | Eligibility criteria | <a href="#">#10</a>  | Inclusion and exclusion criteria for participants. If      | 6   |
| 2  |                      |                      |                                                            |     |
| 3  |                      |                      | applicable, eligibility criteria for study centres and     |     |
| 4  |                      |                      | individuals who will perform the interventions (eg,        |     |
| 5  |                      |                      | surgeons, psychotherapists)                                |     |
| 6  |                      |                      |                                                            |     |
| 7  |                      |                      |                                                            |     |
| 8  |                      |                      |                                                            |     |
| 9  |                      |                      |                                                            |     |
| 10 |                      |                      |                                                            |     |
| 11 | Interventions:       | <a href="#">#11a</a> | Interventions for each group with sufficient detail to     | 7   |
| 12 |                      |                      |                                                            |     |
| 13 | description          |                      | allow replication, including how and when they will be     |     |
| 14 |                      |                      | administered                                               |     |
| 15 |                      |                      |                                                            |     |
| 16 |                      |                      |                                                            |     |
| 17 |                      |                      |                                                            |     |
| 18 |                      |                      |                                                            |     |
| 19 | Interventions:       | <a href="#">#11b</a> | Criteria for discontinuing or modifying allocated          | NA  |
| 20 |                      |                      |                                                            |     |
| 21 | modifications        |                      | interventions for a given trial participant (eg, drug dose |     |
| 22 |                      |                      | change in response to harms, participant request, or       |     |
| 23 |                      |                      | improving / worsening disease)                             |     |
| 24 |                      |                      |                                                            |     |
| 25 |                      |                      |                                                            |     |
| 26 |                      |                      |                                                            |     |
| 27 |                      |                      |                                                            |     |
| 28 |                      |                      |                                                            |     |
| 29 | Interventions:       | <a href="#">#11c</a> | Strategies to improve adherence to intervention            | NA  |
| 30 |                      |                      |                                                            |     |
| 31 | adherence            |                      | protocols, and any procedures for monitoring adherence     |     |
| 32 |                      |                      | (eg, drug tablet return; laboratory tests)                 |     |
| 33 |                      |                      |                                                            |     |
| 34 |                      |                      |                                                            |     |
| 35 |                      |                      |                                                            |     |
| 36 | Interventions:       | <a href="#">#11d</a> | Relevant concomitant care and interventions that are       | 7   |
| 37 |                      |                      |                                                            |     |
| 38 | concomitant care     |                      | permitted or prohibited during the trial                   |     |
| 39 |                      |                      |                                                            |     |
| 40 |                      |                      |                                                            |     |
| 41 |                      |                      |                                                            |     |
| 42 | Outcomes             | <a href="#">#12</a>  | Primary, secondary, and other outcomes, including the      | 8/9 |
| 43 |                      |                      | specific measurement variable (eg, systolic blood          |     |
| 44 |                      |                      | pressure), analysis metric (eg, change from baseline,      |     |
| 45 |                      |                      | final value, time to event), method of aggregation (eg,    |     |
| 46 |                      |                      | median, proportion), and time point for each outcome.      |     |
| 47 |                      |                      |                                                            |     |
| 48 |                      |                      |                                                            |     |
| 49 |                      |                      |                                                            |     |
| 50 |                      |                      |                                                            |     |
| 51 |                      |                      |                                                            |     |
| 52 |                      |                      |                                                            |     |
| 53 |                      |                      | Explanation of the clinical relevance of chosen efficacy   |     |
| 54 |                      |                      | and harm outcomes is strongly recommended                  |     |
| 55 |                      |                      |                                                            |     |
| 56 |                      |                      |                                                            |     |
| 57 |                      |                      |                                                            |     |
| 58 |                      |                      |                                                            |     |
| 59 |                      |                      |                                                            |     |
| 60 |                      |                      |                                                            |     |

|    |                                        |                      |                                                           |               |
|----|----------------------------------------|----------------------|-----------------------------------------------------------|---------------|
| 1  | Participant timeline                   | <a href="#">#13</a>  | Time schedule of enrolment, interventions (including any  | Appendix<br>1 |
| 2  |                                        |                      | run-ins and washouts), assessments, and visits for        |               |
| 3  |                                        |                      |                                                           |               |
| 4  |                                        |                      | participants. A schematic diagram is highly               |               |
| 5  |                                        |                      |                                                           |               |
| 6  |                                        |                      | recommended (see Figure)                                  |               |
| 7  |                                        |                      |                                                           |               |
| 8  |                                        |                      |                                                           |               |
| 9  |                                        |                      |                                                           |               |
| 10 | Sample size                            | <a href="#">#14</a>  | Estimated number of participants needed to achieve        | 9             |
| 11 |                                        |                      | study objectives and how it was determined, including     |               |
| 12 |                                        |                      |                                                           |               |
| 13 |                                        |                      | clinical and statistical assumptions supporting any       |               |
| 14 |                                        |                      | sample size calculations                                  |               |
| 15 | Recruitment                            | <a href="#">#15</a>  | Strategies for achieving adequate participant enrolment   | NA            |
| 16 |                                        |                      |                                                           |               |
| 17 |                                        |                      | to reach target sample size                               |               |
| 18 | <b>Methods:</b>                        |                      |                                                           |               |
| 19 | <b>Assignment of</b>                   |                      |                                                           |               |
| 20 | <b>interventions (for</b>              |                      |                                                           |               |
| 21 | <b>controlled trials)</b>              |                      |                                                           |               |
| 22 | Allocation: sequence<br>generation     | <a href="#">#16a</a> | Method of generating the allocation sequence (eg,         | NA            |
| 23 |                                        |                      | computer-generated random numbers), and list of any       |               |
| 24 |                                        |                      | factors for stratification. To reduce predictability of a |               |
| 25 |                                        |                      | random sequence, details of any planned restriction (eg,  |               |
| 26 |                                        |                      | blocking) should be provided in a separate document       |               |
| 27 |                                        |                      | that is unavailable to those who enrol participants or    |               |
| 28 |                                        |                      | assign interventions                                      |               |
| 29 |                                        |                      |                                                           |               |
| 30 |                                        |                      |                                                           |               |
| 31 | Allocation<br>concealment<br>mechanism | <a href="#">#16b</a> | Mechanism of implementing the allocation sequence         | NA            |
| 32 |                                        |                      | (eg, central telephone; sequentially numbered, opaque,    |               |
| 33 |                                        |                      |                                                           |               |

sealed envelopes), describing any steps to conceal the sequence until interventions are assigned

Allocation: [#16c](#) Who will generate the allocation sequence, who will enrol participants, and who will assign participants to interventions NA

Blinding (masking) [#17a](#) Who will be blinded after assignment to interventions (eg, trial participants, care providers, outcome assessors, data analysts), and how 8

Blinding (masking): [#17b](#) If blinded, circumstances under which unblinding is permissible, and procedure for revealing a participant's allocated intervention during the trial NA

**Methods: Data collection, management, and analysis**

Data collection plan [#18a](#) Plans for assessment and collection of outcome, baseline, and other trial data, including any related processes to promote data quality (eg, duplicate measurements, training of assessors) and a description of study instruments (eg, questionnaires, laboratory tests) along with their reliability and validity, if known. Reference to where data collection forms can be found, if not in the protocol 7

|    |                            |                      |                                                             |    |
|----|----------------------------|----------------------|-------------------------------------------------------------|----|
| 1  | Data collection plan:      | <a href="#">#18b</a> | Plans to promote participant retention and complete         | NA |
| 2  |                            |                      |                                                             |    |
| 3  | retention                  |                      | follow-up, including list of any outcome data to be         |    |
| 4  |                            |                      | collected for participants who discontinue or deviate       |    |
| 5  |                            |                      | from intervention protocols                                 |    |
| 6  |                            |                      |                                                             |    |
| 7  |                            |                      |                                                             |    |
| 8  |                            |                      |                                                             |    |
| 9  |                            |                      |                                                             |    |
| 10 |                            |                      |                                                             |    |
| 11 | Data management            | <a href="#">#19</a>  | Plans for data entry, coding, security, and storage,        | 12 |
| 12 |                            |                      | including any related processes to promote data quality     |    |
| 13 |                            |                      | (eg, double data entry; range checks for data values).      |    |
| 14 |                            |                      | Reference to where details of data management               |    |
| 15 |                            |                      | procedures can be found, if not in the protocol             |    |
| 16 |                            |                      |                                                             |    |
| 17 |                            |                      |                                                             |    |
| 18 |                            |                      |                                                             |    |
| 19 |                            |                      |                                                             |    |
| 20 |                            |                      |                                                             |    |
| 21 |                            |                      |                                                             |    |
| 22 |                            |                      |                                                             |    |
| 23 | Statistics: outcomes       | <a href="#">#20a</a> | Statistical methods for analysing primary and secondary     | 10 |
| 24 |                            |                      | outcomes. Reference to where other details of the           |    |
| 25 |                            |                      | statistical analysis plan can be found, if not in the       |    |
| 26 |                            |                      | protocol                                                    |    |
| 27 |                            |                      |                                                             |    |
| 28 |                            |                      |                                                             |    |
| 29 |                            |                      |                                                             |    |
| 30 |                            |                      |                                                             |    |
| 31 |                            |                      |                                                             |    |
| 32 |                            |                      |                                                             |    |
| 33 | Statistics: additional     | <a href="#">#20b</a> | Methods for any additional analyses (eg, subgroup and       | 10 |
| 34 | analyses                   |                      | adjusted analyses)                                          |    |
| 35 |                            |                      |                                                             |    |
| 36 |                            |                      |                                                             |    |
| 37 |                            |                      |                                                             |    |
| 38 |                            |                      |                                                             |    |
| 39 | Statistics: analysis       | <a href="#">#20c</a> | Definition of analysis population relating to protocol non- | NA |
| 40 | population and             |                      | adherence (eg, as randomised analysis), and any             |    |
| 41 | missing data               |                      | statistical methods to handle missing data (eg, multiple    |    |
| 42 |                            |                      | imputation)                                                 |    |
| 43 |                            |                      |                                                             |    |
| 44 |                            |                      |                                                             |    |
| 45 |                            |                      |                                                             |    |
| 46 |                            |                      |                                                             |    |
| 47 |                            |                      |                                                             |    |
| 48 | <b>Methods: Monitoring</b> |                      |                                                             |    |
| 49 |                            |                      |                                                             |    |
| 50 |                            |                      |                                                             |    |
| 51 | Data monitoring:           | <a href="#">#21a</a> | Composition of data monitoring committee (DMC);             | 12 |
| 52 | formal committee           |                      | summary of its role and reporting structure; statement of   |    |
| 53 |                            |                      | whether it is independent from the sponsor and              |    |
| 54 |                            |                      |                                                             |    |
| 55 |                            |                      |                                                             |    |
| 56 |                            |                      |                                                             |    |
| 57 |                            |                      |                                                             |    |
| 58 |                            |                      |                                                             |    |
| 59 |                            |                      |                                                             |    |
| 60 |                            |                      |                                                             |    |

1 competing interests; and reference to where further  
 2 details about its charter can be found, if not in the  
 3 protocol. Alternatively, an explanation of why a DMC is  
 4 not needed  
 5  
 6  
 7  
 8  
 9

|                                                                            |                                              |                                                                                                                                                                                                                                                                    |    |
|----------------------------------------------------------------------------|----------------------------------------------|--------------------------------------------------------------------------------------------------------------------------------------------------------------------------------------------------------------------------------------------------------------------|----|
| 10<br>11<br>12<br>13<br>14<br>15<br>16<br>17<br>18<br>19                   | <b>Data monitoring:<br/>interim analysis</b> | <a href="#">#21b</a> Description of any interim analyses and stopping<br>guidelines, including who will have access to these<br>interim results and make the final decision to terminate<br>the trial                                                              | NA |
| 20<br>21<br>22<br>23<br>24<br>25<br>26<br>27<br>28<br>29                   | <b>Harms</b>                                 | <a href="#">#22</a> Plans for collecting, assessing, reporting, and managing<br>solicited and spontaneously reported adverse events<br>and other unintended effects of trial interventions or trial<br>conduct                                                     | 12 |
| 30<br>31<br>32<br>33<br>34<br>35<br>36<br>37                               | <b>Auditing</b>                              | <a href="#">#23</a> Frequency and procedures for auditing trial conduct, if<br>any, and whether the process will be independent from<br>investigators and the sponsor                                                                                              | NA |
| 38<br>39<br>40<br>41<br>42                                                 | <b>Ethics and<br/>dissemination</b>          |                                                                                                                                                                                                                                                                    |    |
| 43<br>44<br>45<br>46<br>47                                                 | <b>Research ethics<br/>approval</b>          | <a href="#">#24</a> Plans for seeking research ethics committee /<br>institutional review board (REC / IRB) approval                                                                                                                                               | 12 |
| 48<br>49<br>50<br>51<br>52<br>53<br>54<br>55<br>56<br>57<br>58<br>59<br>60 | <b>Protocol<br/>amendments</b>               | <a href="#">#25</a> Plans for communicating important protocol<br>modifications (eg, changes to eligibility criteria,<br>outcomes, analyses) to relevant parties (eg,<br>investigators, REC / IRBs, trial participants, trial<br>registries, journals, regulators) | NA |

|    |                       |                      |                                                            |    |
|----|-----------------------|----------------------|------------------------------------------------------------|----|
| 1  | Consent or assent     | <a href="#">#26a</a> | Who will obtain informed consent or assent from            | 11 |
| 2  |                       |                      |                                                            |    |
| 3  |                       |                      |                                                            |    |
| 4  |                       |                      | potential trial participants or authorised surrogates, and |    |
| 5  |                       |                      |                                                            |    |
| 6  |                       |                      | how (see Item 32)                                          |    |
| 7  |                       |                      |                                                            |    |
| 8  |                       |                      |                                                            |    |
| 9  | Consent or assent:    | <a href="#">#26b</a> | Additional consent provisions for collection and use of    | NA |
| 10 |                       |                      |                                                            |    |
| 11 | ancillary studies     |                      | participant data and biological specimens in ancillary     |    |
| 12 |                       |                      |                                                            |    |
| 13 |                       |                      | studies, if applicable                                     |    |
| 14 |                       |                      |                                                            |    |
| 15 |                       |                      |                                                            |    |
| 16 | Confidentiality       | <a href="#">#27</a>  | How personal information about potential and enrolled      | 12 |
| 17 |                       |                      |                                                            |    |
| 18 |                       |                      | participants will be collected, shared, and maintained in  |    |
| 19 |                       |                      |                                                            |    |
| 20 |                       |                      | order to protect confidentiality before, during, and after |    |
| 21 |                       |                      |                                                            |    |
| 22 |                       |                      | the trial                                                  |    |
| 23 |                       |                      |                                                            |    |
| 24 |                       |                      |                                                            |    |
| 25 |                       |                      |                                                            |    |
| 26 | Declaration of        | <a href="#">#28</a>  | Financial and other competing interests for principal      | 14 |
| 27 |                       |                      |                                                            |    |
| 28 | interests             |                      | investigators for the overall trial and each study site    |    |
| 29 |                       |                      |                                                            |    |
| 30 |                       |                      |                                                            |    |
| 31 |                       |                      |                                                            |    |
| 32 | Data access           | <a href="#">#29</a>  | Statement of who will have access to the final trial       | 12 |
| 33 |                       |                      |                                                            |    |
| 34 |                       |                      | dataset, and disclosure of contractual agreements that     |    |
| 35 |                       |                      |                                                            |    |
| 36 |                       |                      | limit such access for investigators                        |    |
| 37 |                       |                      |                                                            |    |
| 38 |                       |                      |                                                            |    |
| 39 | Ancillary and post    | <a href="#">#30</a>  | Provisions, if any, for ancillary and post-trial care, and | NA |
| 40 |                       |                      |                                                            |    |
| 41 | trial care            |                      | for compensation to those who suffer harm from trial       |    |
| 42 |                       |                      |                                                            |    |
| 43 |                       |                      | participation                                              |    |
| 44 |                       |                      |                                                            |    |
| 45 |                       |                      |                                                            |    |
| 46 |                       |                      |                                                            |    |
| 47 | Dissemination policy: | <a href="#">#31a</a> | Plans for investigators and sponsor to communicate trial   | 12 |
| 48 |                       |                      |                                                            |    |
| 49 | trial results         |                      | results to participants, healthcare professionals, the     |    |
| 50 |                       |                      |                                                            |    |
| 51 |                       |                      | public, and other relevant groups (eg, via publication,    |    |
| 52 |                       |                      |                                                            |    |
| 53 |                       |                      | reporting in results databases, or other data sharing      |    |
| 54 |                       |                      |                                                            |    |
| 55 |                       |                      | arrangements), including any publication restrictions      |    |
| 56 |                       |                      |                                                            |    |
| 57 |                       |                      |                                                            |    |
| 58 |                       |                      |                                                            |    |
| 59 |                       |                      |                                                            |    |
| 60 |                       |                      |                                                            |    |



1 Dissemination policy: [#31b](#) Authorship eligibility guidelines and any intended use of NA  
 2 authorship professional writers  
 3  
 4  
 5

6 Dissemination policy: [#31c](#) Plans, if any, for granting public access to the full NA  
 7 reproducible protocol, participant-level dataset, and statistical code  
 8 research  
 9  
 10  
 11  
 12

## 13 Appendices

14  
 15  
 16  
 17 Informed consent [#32](#) Model consent form and other related documentation Appendix  
 18 materials given to participants and authorised surrogates 3  
 19  
 20  
 21

22 Biological specimens [#33](#) Plans for collection, laboratory evaluation, and storage NA  
 23 of biological specimens for genetic or molecular analysis  
 24 in the current trial and for future use in ancillary studies,  
 25 if applicable  
 26  
 27  
 28  
 29  
 30  
 31

32  
 33 None The SPIRIT Explanation and Elaboration paper is distributed under the terms of the Creative  
 34 Commons Attribution License CC-BY-NC. This checklist can be completed online using  
 35 <https://www.goodreports.org/>, a tool made by the [EQUATOR Network](#) in collaboration with  
 36 [Penelope.ai](#)  
 37  
 38  
 39  
 40  
 41  
 42  
 43  
 44  
 45  
 46  
 47  
 48  
 49  
 50  
 51  
 52  
 53  
 54  
 55  
 56  
 57  
 58  
 59  
 60

# BMJ Open

## Assessment of cervical Softening and the Prediction of Preterm birth (STIPP): protocol for a prospective cohort study

|                                 |                                                                                                                                                                                                                                                                                                                                                                                                                                                                                                                                                                                                                                                                                                                                                                                                 |
|---------------------------------|-------------------------------------------------------------------------------------------------------------------------------------------------------------------------------------------------------------------------------------------------------------------------------------------------------------------------------------------------------------------------------------------------------------------------------------------------------------------------------------------------------------------------------------------------------------------------------------------------------------------------------------------------------------------------------------------------------------------------------------------------------------------------------------------------|
| Journal:                        | <i>BMJ Open</i>                                                                                                                                                                                                                                                                                                                                                                                                                                                                                                                                                                                                                                                                                                                                                                                 |
| Manuscript ID                   | bmjopen-2023-071597.R2                                                                                                                                                                                                                                                                                                                                                                                                                                                                                                                                                                                                                                                                                                                                                                          |
| Article Type:                   | Protocol                                                                                                                                                                                                                                                                                                                                                                                                                                                                                                                                                                                                                                                                                                                                                                                        |
| Date Submitted by the Author:   | 16-Oct-2023                                                                                                                                                                                                                                                                                                                                                                                                                                                                                                                                                                                                                                                                                                                                                                                     |
| Complete List of Authors:       | Breuking, Sofie; Amsterdam UMC Locatie AMC, Obstetrics and gynaecology; Amsterdam Reproduction and Development Research Institute<br>Oudijk, Martijn; Amsterdam UMC Locatie VUmc, Obstetrics; Amsterdam Reproduction and Development Research Institute<br>van Eekelen, Rik; Amsterdam Reproduction and Development Research Institute, Obstetrics and Gynaecology<br>de Boer, Marjon; Amsterdam UMC Locatie VUmc, Department of Obstetrics and Gynaecology; Amsterdam Reproduction and Development Research Institute<br>Pajkrt, Eva; Amsterdam UMC Location AMC, Obstetrics and Gynaecology; Amsterdam Reproduction and Development Research Institute<br>Hermans, Frederik; Amsterdam UMC Locatie AMC, Obstetrics and Gynaecology; Amsterdam Reproduction and Development Research Institute |
| <b>Primary Subject Heading</b>: | Obstetrics and gynaecology                                                                                                                                                                                                                                                                                                                                                                                                                                                                                                                                                                                                                                                                                                                                                                      |
| Secondary Subject Heading:      | Obstetrics and gynaecology                                                                                                                                                                                                                                                                                                                                                                                                                                                                                                                                                                                                                                                                                                                                                                      |
| Keywords:                       | Maternal medicine < OBSTETRICS, OBSTETRICS, Prenatal diagnosis < OBSTETRICS                                                                                                                                                                                                                                                                                                                                                                                                                                                                                                                                                                                                                                                                                                                     |
|                                 |                                                                                                                                                                                                                                                                                                                                                                                                                                                                                                                                                                                                                                                                                                                                                                                                 |

SCHOLARONE™  
Manuscripts

1  
2  
3 1 **Assessment of cervical Softening and the Prediction of Preterm birth (STIPP): protocol for**  
4 **a prospective cohort study**  
5 2

6  
7 3 Sofie. H. Breuking, MD<sup>1, 2, \*</sup> Martijn A. Oudijk, MD, PhD<sup>2,3</sup>, R. van Eekelen<sup>4</sup>, M.A. de Boer, MD,  
8  
9 4 PhD<sup>2,3</sup> Eva. Pajkrt, MD, PhD<sup>1, 2</sup>, Frederik J. R. Hermans, MD PhD<sup>1,2</sup>

10 5 1. Amsterdam UMC location AMC, University of Amsterdam, Obstetrics and Gynaecology,  
11  
12 6 Meibergdreef 9, Amsterdam, Netherlands

13  
14 7 2. Amsterdam Reproduction and Development Research Institute, Netherlands

15  
16 8 3. Amsterdam UMC location Vrije Universiteit Amsterdam, Obstetrics and Gynaecology,  
17  
18 9 Boelelaan 1117, Amsterdam, Netherlands

19  
20 10 4. Obstetrics and Gynaecology, Centre for Reproductive Medicine, Amsterdam Reproduction  
21  
22 11 and Development Research Institute, Amsterdam UMC Location AMC, Amsterdam,  
23  
24 12 Netherlands

25  
26 13 \*Correspondence to:

27  
28 14 Sofie. H. Breuking

29  
30 15 s.h.breuking@amsterdamumc.nl

31  
32 16  
33 17 **Abstract**

34  
35 18 **Introduction**

36  
37 19 Preterm birth (PTB) is amongst the leading causes of perinatal and childhood morbidity and  
38  
39 20 mortality. Therefore, accurate identification of pregnant women at high risk of PTB is key to  
40  
41 21 enable obstetric healthcare professionals to apply interventions that improve perinatal and  
42  
43 22 childhood outcomes. Serial transvaginal cervical length measurement is used to screen  
44  
45 23 asymptomatic pregnant women with a history of PTB and identify those at high risk for a  
46  
47 24 recurrent PTB. Cervical length measurement, foetal fibronectin test or a combination of both  
48  
49 25 can be used to identify women at high risk of PTB in women presenting with symptoms of  
50  
51 26 threatened PTB. The predictive capacity of these methods can be improved. Cervical  
52  
53 27 softening is precursor of cervical shortening, effacement and dilatation and could be a new  
54  
55 28 marker to identify women a high risk of PTB. However, the predictive value of cervical  
56  
57 29 softening to predict spontaneous PTB still needs to be determined.

58  
59 30 **Methods and analysis**  
60

1  
2  
3 31 This is a single-centre, prospective cohort study, being conducted at Amsterdam University  
4 32 Medical Center in the Netherlands. Cervical softening will be investigated with a non-invasive  
5 33 CE-marked device called the Pregnolia System. This device has been developed to evaluate  
6 34 consistency of the cervix based on tissue elasticity. Two different cohorts will be investigated.  
7 35 The first cohort includes women with a history of spontaneous PTB <34 weeks. These women  
8 36 undergo biweekly measurement between 14 and 24 weeks of gestation. The second cohort  
9 37 includes women with symptoms of threatened PTB. These women will receive the  
10 38 measurement once on presentation between 24 and 34 weeks of gestation. The primary  
11 39 outcome is spontaneous PTB before 34 weeks for women with a history of PTB and delivery  
12 40 within seven days for women with threatened PTB. The minimum sample size required to  
13 41 analyse the primary outcome is 227 women with a history of PTB and 163 women with  
14 42 symptoms of threatened PTB. Once this number is achieved, the study will be continued to  
15 43 investigate secondary objectives.

#### 26 44 **Ethics and dissemination**

27 45 The study is approved by the Medical Ethics Committee of Amsterdam UMC  
28 46 (METC2022.0226). All patients will give oral and written informed consent prior to entry of  
29 47 the study. Results will be disseminated via a peer-reviewed journal.

#### 30 48 **Study registration**

31 49 ClinicalTrials.gov, NCT05477381 (date of registration: 27<sup>th</sup> July 2022).  
32 50

#### 33 51 **Strengths and limitations of this study**

- 34 52 - A strength of this study is that it is organized in a way with minimal interference in daily  
35 53 practice and therefore a high participation rate is expected.
- 36 54 - Another notable strength of the study is its prospective cohort design, which includes  
37 55 women across a range of all cervical lengths, thereby establishing an internal control  
38 56 group of women with longer cervix lengths within the cohorts.
- 39 57 - This study investigates the cervical stiffness index in a population of high-risk women  
40 58 for preterm birth and combines the results with other important predictors for  
41 59 preterm birth.
- 42 60 - As a prospectively cohort study, we expect less bias than in a retrospective cohort.

1  
2  
3 61 - A limitation of the study is the single-centre setting, potentially limiting external  
4 validity and generalizability.  
5  
6  
7 63

8  
9 64 **Introduction**

10  
11 65 Spontaneous preterm birth (PTB), defined as delivery before 37 weeks of gestation, is the  
12 leading cause of perinatal and neonatal morbidity and mortality(1). Rates of spontaneous PTB  
13 appears to be increasing. Annually, 15 million children are born preterm and this is directly  
14 responsible for the death of one million neonates(2, 3). Neonates who survive PTB are at  
15 increased risk for long-term neurologic sequelae and developmental disabilities(4, 5).  
16 Identifying pregnant women at risk is important to be able to take precautionary measures,  
17 however this is a challenge for obstetric healthcare professionals.  
18

19 66  
20 67  
21 68  
22 69  
23 70  
24 71  
25 72 Important obstetric and gynaecological risk factors for PTB are midtrimester short cervical  
26 length, prior cervical surgery and previous spontaneous PTB. (6-9) Women with a history of  
27 spontaneous PTB before 34 weeks of gestation are at a 5-fold increased risk of a spontaneous  
28 PTB in a subsequent pregnancy compared to women with a previous term birth(10). In  
29 addition to vaginal progesterone administration, biweekly cervical length screening is  
30 recommended in these women. This can identify women at high risk of a recurrent PTB based  
31 on short cervical length that benefit from a vaginal cerclage. However, in women with a  
32 previous PTB, the positive predictive value (PPV) of a short cervical length is 34%. (11)  
33 Therefore, this approach only identifies a proportion of women who will have a recurrent PTB.  
34 This calls for additional measurements to identify the group more adequately at risk for  
35 recurrent PTB.  
36  
37

38 73  
39 74  
40 75  
41 76  
42 77  
43 78  
44 79  
45 80  
46 81  
47 82  
48 83 Another group of pregnant women at risk of PTB are women presenting with symptoms of  
49 threatened PTB in their current pregnancy. These women can be triaged with transvaginal  
50 cervical length measurement and foetal fibronectin (fFN) to identify women with an increased  
51 risk of delivery within seven days. Women with a high risk of PTB at less than 32 weeks of  
52 gestation are admitted to a centre with NICU facilities and treated with antenatal  
53 corticosteroids and tocolysis for 48 hours to improve perinatal outcome.(12) This combination  
54 of markers are characterized by a high negative predictive value (NPV) but a poor PPV. This  
55 results in overtreatment and unnecessary healthcare costs. A large proportion of women with  
56  
57  
58  
59  
60

1  
2  
3 91 symptoms of threatened PTB will not deliver within seven days due to the low PPV, however  
4  
5 92 these women remain at risk for PTB later in pregnancy. (13-15)  
6

7 93 More adequate techniques to assess women at high risk of recurrent PTB or at high risk of  
8  
9 94 delivering in a short time frame when presenting with symptoms of threatened PTB are  
10  
11 95 urgently needed. Therefore, objective measurement of the cervical consistency is a promising  
12  
13 96 technique.  
14

15 97 To maintain pregnancy and deliver at term an appropriate function of the cervix is required.  
16  
17 98 Delivery is preceded by softening and shortening of the cervix.(16) Changes in cervical  
18  
19 99 consistency can be detected from fertilization until delivery. Throughout pregnancy  
20  
21 100 consistency of the cervix changes and will soften when approaching delivery.(17, 18) Softening  
22  
23 101 of the cervix precedes shortening and therefore could be a promising marker to identify an  
24  
25 102 upcoming delivery at an earlier stage.  
26

27 103 Parra-Saavedra *et al.*(19) investigated this phenomenon with transvaginal ultrasound. The  
28  
29 104 cervical consistency was measured by measuring the difference of the anteroposterior cervical  
30  
31 105 diameter before (AP) and after (AP<sup>1</sup>) application of pressure on the cervix with the transvaginal  
32  
33 106 probe. The cervical consistency was then calculated with the following formula: ((AP<sup>1</sup>/AP) \*  
34  
35 107 100) = Cervical consistency index. Cervical consistency had an inverse linear relationship with  
36  
37 108 gestational age. This means that cervical consistency declines, thus becomes softer, during  
38  
39 109 progression of pregnancy and this phenomenon can be detected during pregnancy. Secondly,  
40  
41 110 it demonstrated that pregnant women with a more progressive decline in cervical consistency  
42  
43 111 are more likely to have a spontaneous PTB compared to women with physiological decline in  
44  
45 112 cervical consistency.  
46

47 113 Other techniques that show positive result in evaluating cervical softness is by using  
48  
49 114 elastography methods, including strain elastography (SE) and shear wave elastography  
50  
51 115 (SWE)(20). Nonetheless, there are technical considerations that first need to be resolved  
52  
53 116 before elastography can be applied extensively. For example, the results of SE are affected by  
54  
55 117 operator-applied pressure on the cervix, resulting in an inter-observer variability making the  
56  
57 118 technique less objective and standardized (21, 22). Moreover, for SWE, safety concerns, such  
58  
59 119 as the unknown risk of foetal tissues(23), first must be addressed before elastography  
60  
120 methods can be applied extensively.

1  
2  
3 121 Recently, a non-invasive technique has been developed to evaluate consistency of the cervix  
4  
5 122 based on tissue elasticity. The Pregnolia System is a market-available, CE-marked device  
6  
7 123 designed to measure cervical stiffness. This system provides quantitative measurements of  
8  
9 124 the cervical consistency based on aspiration technique.

10  
11 125 A prototype has been tested and measurements were carried out in 50 non-pregnant and 50  
12  
13 126 pregnant women(18). The results were in line with the study by Parra-Saavedra *et al.*(19) and  
14  
15 127 showed that as pregnancy progresses, the cervix softens and this process starts before  
16  
17 128 shortening. Therefore, by measuring the CSI, delivery could be detected earlier compared to  
18  
19 129 conventional shortening of the cervix measured with transvaginal ultrasound.

20  
21 130 Also, a recent study by Stone *et al.*(22) investigated cervical softness before cerclage  
22  
23 131 placement with the Pregnolia System. This study demonstrated patients with a ultra-sound  
24  
25 132 indicated cerclage, had significantly softer cervices compared to normal controls. They also  
26  
27 133 stated this aspiration technique is a promising technique for objective and quantitative  
28  
29 134 measurement of cervical softness.

30  
31 135 Since cervical softening is a precursor of cervical shortening, this could be a novel marker to  
32  
33 136 predict spontaneous PTB and contribute to better identification of women with an increased  
34  
35 137 risk of PTB. Also, the predictive value of cervical softening in combination with cervical length  
36  
37 138 could be promising to improve prediction of PTB. However, these hypotheses still must be  
38  
39 139 examined.

40  
41 140 Therefore, the aim of this cohort study is to evaluate the predictive value of the CSI to predict  
42  
43 141 the risk of spontaneous PTB in pregnant women with an increased risk of PTB.

44  
45 142

## 46 47 143 **Methods and analysis**

### 48 49 144 **Study design**

50  
51 145 This study is an investigator-initiated, single-centre prospective cohort study being  
52  
53 146 undertaken at the Amsterdam University Medical Center in the Netherlands. Recruitment  
54  
55 147 started on 18<sup>th</sup> August 2022. We expect a study duration of 3 years to investigate the primary  
56  
57 148 objectives.

58  
59 149 Two cohorts will be investigated:  
60

1  
2  
3 150 - Pregnant women with a history of spontaneous PTB before 34 weeks of gestation  
4 151 (Cohort A-STIPP).

5  
6  
7 152 - Pregnant women presenting with symptoms of threatened PTB between 24 and 34  
8 153 weeks of gestation (Cohort S-STIPP).

9  
10 154 The measurements of cervical stiffness will be performed in addition to standard care (Appendix  
11 155 1), using the aspiration technique-based device named the Pregnolia System.

## 156 **Participants**

16 157 In order to be eligible to participate in this study, pregnant women must meet all of the  
17 158 following criteria:

- 18  
19  
20 159 - Age 18 years or above.  
21  
22 160 - Ability to understand Dutch or English (both spoken and written).  
23  
24 161 - Ultrasound-based gestational age determined by measurement of crown rump  
25 162 length (CRL), determined between 9 and 11 weeks of gestation.  
26  
27 163 - Singleton and twin pregnancies.

### 28 164 A-STIPP cohort

29 165 Pregnant women with an increased risk of PTB based on a medical history of spontaneous PTB  
30 166 before 34 weeks of gestation will be included.

### 31 167 S-STIPP cohort

32 168 Pregnant women, with a gestational age between 24 and 34 weeks presenting with symptoms  
33 169 of threatened PTB, such as abdominal pain, vaginal blood loss, contractions or other  
34 170 complaints suggestive for threatened PTB, will be included.

35 171  
36 172 A potential subject who meets any of the following criteria will be excluded from participation:

- 37 173 - Signs of intrauterine infection.  
38 174 - Obstetric indication for immediate delivery (e.g. advanced labour, cord prolapse,  
39 175 abruption, signs of foetal distress).  
40 176 - Confirmed foetal abnormality.  
41 177 - Confirmed preterm rupture of membranes.  
42 178 - Confirmed vasa / placenta praevia.  
43 179 - Severe vaginal bleeding and light bleeding that cannot be stopped.



- 1  
2  
3 180 - Signs of imminent labour such as advanced dilatation making it impossible to  
4  
5 181 measure the cervix.  
6  
7 182

### 183 **Measurements**

#### 184 *Cervical stiffness measurement*

185 The Cervical stiffness index (CSI) will be measured subsequent to measurement of the cervical  
186 length. The Pregnolia System is composed of two components: an active, reusable device and  
187 a disposable single-use sterile probe.

- 188 - The control unit is an active device with a power supply, foot switch, connector cable  
189 and an integrated pump that generates vacuum.
- 190 - The single-use sterile probe is connected to the control unit console through a  
191 connector cable. Air filters on the probe prevent microbiological contamination of the  
192 control unit. This probe is designed to minimise the contact interaction between the  
193 user and the patients during the measurement. The probe tip diameter is 12mm. Each  
194 single-use, disposable probe is packed in a sterile pouch.

195 To perform the measurement, the cervix is visualized with a speculum. The disposable probe  
196 is placed on the anterior lip of the cervix (12 o'clock position). The control will create a weak  
197 vacuum inside the probe that pulls the cervical tissue, very gently and slowly, into the probe  
198 tip by a fixed distance of 4mm. The negative aspiration pressure needed to deform the tissue  
199 is the outcome of the measurement. A high-pressure value corresponds with stiff tissue and a  
200 low pressure corresponds with soft tissue. The CSI assessment is performed in three  
201 consecutive measurements at the same location, without any time lag and without removing  
202 the probe from the cervix. For an overview of the measurement procedure, please refer to  
203 the diagram available at the Pregnolia website (<https://en.pregnolia.com/fachpersonen2-1>).

#### 205 *Sonographic measurement*

206 Cervical length measurement with transvaginal ultrasound is routine care in both cohorts.  
207 The cervical length will be determined as the linear distance between internal and external  
208 cervical os, excluding the endocervical funnel as described by Kagan *et al.* (24)  
209 In the A-STIPP cohort, transvaginal ultrasound will be done biweekly from 14 until 24 weeks  
210 of gestation. In case a short cervix is detected at less than 25 mm, a cerclage, or a pessary in  
211 study context, is placed. Afterwards, the measurement of CSI will not be continued.

1  
2  
3 212 In the S-STIPP cohort, the transvaginal ultrasound will be performed when a woman presents  
4  
5 213 with any symptom of threatened PTB, between 24 and 34 weeks of gestation.  
6

7 214

#### 8 215 *Questionnaire*

9  
10 216 Participants will be asked to fill out a structured questionnaire to screen for additional risk  
11  
12 217 factors of PTB. The questionnaire contains questions about the current pregnancy and details  
13  
14 218 about previous pregnancies, if applicable. Moreover, details on cervical surgery in the past  
15  
16 219 and family history of PTB are requested. Baseline characteristics such as height, weight and  
17  
18 220 smoking and medical history, including gynaecological history and uterus malformations, will  
19  
20 221 be collected. The questionnaire will be checked with the patient's electronic file.

21 222 For the S-STIPP cohort, participants will be asked about the specific symptoms associated with  
22  
23 223 threatened PTB.  
24

25 224

#### 26 225 **Blinding**

27  
28 226 For the A-STIPP cohort, clinicians and participants are blinded for the results of the CSI  
29  
30 227 measurement.

31  
32 228 In the S-STIPP cohort, the clinician working at the emergency department performs the  
33  
34 229 measurement and therefore making it impossible to blind the treating clinician. The  
35  
36 230 participant however is blinded for the results.  
37

38 231

#### 39 232 **Follow-up**

40  
41 233 Participants will be followed-up from inclusion until delivery. Detailed information regarding  
42  
43 234 the pregnancy outcomes, including maternal and neonatal outcomes will be gathered.

44  
45 235 Also, if applicable, detailed information about hospital admittance during pregnancy will be  
46  
47 236 noted. Moreover, if a participant is admitted due to threatened PTB, received treatments such  
48  
49 237 as antenatal corticosteroids, tocolytic medicines, or magnesium sulfate for neonatal  
50  
51 238 neuroprotection will be documented.  
52

53 239

#### 54 240 **Primary outcomes**

55  
56 241 - The primary outcome for the A-STIPP cohort is spontaneous PTB before 34 weeks of  
57  
58 242 gestation.

59  
60 243 - The primary outcome for the S-STIPP cohort is delivery within 7 days.

1  
2  
3 244 **Secondary outcomes**

- 4  
5 245 - Spontaneous PTB before 37 weeks of gestation  
6  
7 246 - Spontaneous PTB before 34 weeks of gestation<sup>#</sup>  
8  
9 247 - Spontaneous PTB before 32 weeks of gestation  
10  
11 248 - Spontaneous PTB before 28 weeks of gestation  
12  
13 249 - Latency time (time between inclusion and delivery)  
14  
15 250 - Delivery within 48 hours<sup>#</sup>  
16  
17 251 - Preterm Premature rupture of Membranes (PPROM)

18 252 # S-STIPP only  
19

20 253  
21

22 254 **Other outcomes**

23  
24  
25 255 Safety of the use of the Pregnolia System (as defined in Appendix 2) will be investigated.

26  
27 256 Also, patient discomfort of the measurement will be evaluated by a general questionnaire.  
28  
29

30 257

31 258 **Power analysis**

32  
33 259 We used contemporary sample size calculations described by *Riley et al.*(25) for developing  
34  
35 260 prediction models, based on three criteria that each provide a sample size to satisfy that  
36  
37 261 criterion, then picking the highest sample size out of the three. The following input parameters  
38  
39 262 are used to calculate the required number of inclusions; 1) expected prevalence of the primary  
40  
41 263 outcome, 2) expected amount of explained variance by the prediction model and 3) number  
42  
43 264 of predictors (input variables).

44 265 For the A-STIPP cohort the prevalence [0.18] was derived from the QUIPP-study (26-28). The  
45  
46 266 standard level of variance [0.15] was used to calculate sample size.

47  
48 267 For the S-STIPP cohort, the prevalence [0.12] and variance [0.45] were derived from the  
49  
50 268 Apostel I study(12, 29). Both studies have comparable patients as the A-STIPP and S-STIPP  
51  
52 269 study.

53 270 To investigate additional input predictors with sufficient power, an increase in sample size is  
54  
55 271 needed. When inclusion of participants continues and the second threshold is reached,  
56  
57 272 another input parameter is added, until the next threshold and so on. The baseline predictors  
58  
59  
60

1  
2  
3 273 used in the first step will be the CSI measurement combined with cervical length measurement  
4  
5 274 in the A-STIPP cohort, and cervical length with fFN in S-STIPP cohort.

6  
7 275 See table 1 and table 2 for the steps and the threshold sample sizes. In both calculations the  
8  
9 276 number of predictors was gradually increased. Continuous variables count as a single-input  
10  
11 277 variable, as well as dichotomous input variables. Categorical variables are counted as C-1, thus  
12  
13 278 the number of input variables is the number categories minus one. The additional predictor  
14  
15 279 variables are summarized in table 3.

16 280

17  
18 281 Sample size calculations were performed using R (R: A language and environment for  
19  
20 282 statistical computing. R Foundation for Statistical Computing, Vienna, Austria.  
21  
22 283 URL <https://www.R-project.org/>) with the use of the *pmsampsize* package (25).

23  
24 284 Table 1 and table 2 indicates the number of participants needed. For the A-STIPP, the  
25  
26 285 minimum sample size of 227 patients is required to achieve the primary objective of this study.  
27  
28 286 Once this number is achieved, the study will be continued to investigate secondary objectives.  
29  
30 287 For the S-STIPP, the minimum sample size of 163 patients is required to achieve the primary  
31  
32 288 objective of this study. Once this number is achieved, the study will be continued to  
33  
34 289 investigate secondary objectives, by using the dynamical sample size as explained.

35 290

### 36 291 **Statistical analysis**

37  
38 292 Baseline characteristics will be calculated using descriptive statistics. Continuous variables will be  
39  
40 293 reported as mean with standard deviation or median with interquartile range. Categorical  
41  
42 294 variables will be reported as proportions.

43  
44 295 Out of the three repetitive CSI measurements conducted, depending on which proves to be the  
45  
46 296 best predictor, the first, the average or the lowest measurement values will be utilized.

47  
48 297 To incorporate repeated measures of CSI from the A-STIPP cohort, a logistic generalized mixed  
49  
50 298 model will be used. As CSI is a continuous outcome, linear and non-linear functions will be  
51  
52 299 compared using restricted cubic splines. A lower Akaike's Information Criterion (AIC) or overall p-  
53  
54 300 value will determine which functional form is chosen.(25) If there is censoring (i.e. loss-to-follow-  
55  
56 301 up), a Cox proportional hazards model for time to delivery including a time-varying covariate for  
57  
58 302 CSI will be used. As a sensitivity analysis, a comparison of either of these models with a joint

1  
2  
3 303 survival model will be done (combining a Cox model for time to delivery with a linear mixed model  
4  
5 304 for CSI measurements).

6  
7 305 For the S-STIPP cohort, a logistic regression will be used to determine the relationship between  
8  
9 306 input variables and a dichotomous outcome.

10  
11  
12 307

13  
14 308 **Subgroup analysis**

15  
16  
17 309 Subgroup analysis are planned for participants and treatments that may potentially effect cervical  
18  
19 310 stiffness, in order to assess their impact on the CSI:

- 20  
21 311 - Nulliparous versus multiparous women  
22  
23 312 - Singleton versus multiple pregnancies  
24  
25 313 - Women with previous cervical surgery versus women without  
26  
27 314 - Women with a (abdominal or cervical) cerclage in current pregnancy versus no cerclage  
28  
29 315 - Women treated with progesterone versus no treatment

30  
31 316 *A-STIPP cohort subgroup analysis*

32  
33 317 Subgroup of interest in asymptomatic participants are:

- 34  
35  
36 318 - Women with a short cervix ( $\leq 25$ mm) during screening vs. women with a long cervix  
37  
38 319 ( $> 25$ mm)  
39  
40 320 - Women who received additional treatment (pessary or cerclage) vs. no treatment.

41  
42  
43 321 *S-STIPP cohort subgroup analysis*

44  
45 322 Subgroup of interest in symptomatic participants are performed in groups based on clinical risk  
46  
47 323 stratification:

- 48  
49 324 - Cervical length  $\geq 30$ mm  
50  
51 325 - Cervical length  $\geq 15$  and  $< 30$ mm with negative fFN  
52  
53 326 - Cervical length  $\geq 15$  and  $< 30$ mm with positive fFN  
54  
55 327 - Cervical length  $< 15$  mm

56  
57 328

58  
59 329 **Monitoring and safety**

1  
2  
3 330 An independent Data and Safety Monitoring Board (DSMB) is assigned to safeguard the safety of  
4  
5 331 the study participants and provide recommendations.  
6

7 332 Since the measurement with the Pregnotia System is minimally invasive, the risk of adverse  
8  
9 333 events (AEs) related to the measurement is small. However, any AEs and serious adverse  
10  
11 334 events (SAEs) will be reported. If evaluation by the DSMB demonstrates increased safety risks  
12  
13 335 within the study, the DSMB can always advice to stop the study.  
14

15 336

### 16 337 **Data management**

17  
18 338 Data will be collected using an accredited electronic data capture system (Castor). To protect the  
19  
20 339 privacy of the participant, personal data is encrypted. Data cannot be traced back to participants  
21  
22 340 in reports and publications about the study. All personal data is protected according to the General  
23  
24 341 Data Protection Regulation (GDPR and Dutch privacy regulation (AVG)).  
25

26 342 All agreements regarding data sharing are defined in a signed Clinical Trial Agreement (CTA), GDPR  
27  
28 343 are applicable to this agreement.  
29

30 344

### 31 345 **Clinical impact**

32  
33 346 This STIPP study will provide evidence on the value of the cervical stiffness as a single clinical  
34  
35 347 marker and in combination with other clinical markers such as cervical length to predict the  
36  
37 348 risk of spontaneous PTB in groups of pregnant women with an increased risk of PTB.  
38  
39 349

### 40 350 **Patient and public involvement**

41  
42 351 The patient organisation care4Neo was informed about the study and was favourable about  
43  
44 352 purpose of the study.  
45  
46 353

### 47 354 **Ethics and dissemination**

48  
49 355 The Medical Ethics Committee of the Amsterdam UMC has given approval for this research  
50  
51 356 (METC2022.0226). All participants will give written and oral informed consent prior to entry  
52  
53 357 to the study and will be made aware participation is completely voluntary. The results of the  
54  
55 358 study will be submitted for publication in a peer-reviewed journal.  
56  
57 359

58 359

59 360

## 361 **Contributors**

362 FH initiated the research. FH and SB designed the study. SB wrote the proposal and the  
363 manuscript. FH, MO, RE, MB and EP critically revised the proposal and manuscript. All authors  
364 read and approved the final manuscript.

## 366 **Funding**

367 This work was supported and funded by the Pregnoia Institute. They also provided the system  
368 and the probes. The funders had no role in the study design, conduction of the study,  
369 collection, management, analysis and interpretation of the data. Also, the funder had no role  
370 in preparation, reviewing or approval of the manuscript. Funding was not provided by the  
371 study sponsor.

## 373 **Competing interests**

374 None declared.

## 376 **References**

- 377 1. Blencowe H, Cousens S, Oestergaard MZ, Chou D, Moller AB, Narwal R, Adler A, Vera Garcia  
378 C, Rohde S, Say L, Lawn JE. National, regional, and worldwide estimates of preterm birth rates in the  
379 year 2010 with time trends since 1990 for selected countries: a systematic analysis and implications.  
380 Lancet. 2012;379(9832):2162-72.
- 381 2. Liu L, Johnson HL, Cousens S, Perin J, Scott S, Lawn JE, Rudan I, Campbell H, Cibulskis R, Li M,  
382 Mathers C, Black RE, Child Health Epidemiology Reference Group of WHO, Unicef. Global, regional,  
383 and national causes of child mortality: an updated systematic analysis for 2010 with time trends since  
384 2000. Lancet. 2012;379(9832):2151-61.
- 385 3. Liu L, Oza S, Hogan D, Perin J, Rudan I, Lawn JE, Cousens S, Mathers C, Black RE. Global,  
386 regional, and national causes of child mortality in 2000-13, with projections to inform post-2015  
387 priorities: an updated systematic analysis. Lancet. 2015;385(9966):430-40.
- 388 4. Marlow N, Wolke D, Bracewell MA, Samara M, Group EPS. Neurologic and developmental  
389 disability at six years of age after extremely preterm birth. N Engl J Med. 2005;352(1):9-19.
- 390 5. Mwaniki MK, Atieno M, Lawn JE, Newton CR. Long-term neurodevelopmental outcomes after  
391 intrauterine and neonatal insults: a systematic review. Lancet. 2012;379(9814):445-52.
- 392 6. van Zijl MD, Koullali B, Mol BW, Pajkrt E, Oudijk MA. Prevention of preterm delivery: current  
393 challenges and future prospects. Int J Womens Health. 2016;8:633-45.
- 394 7. van der Ven J, van Os MA, Kazemier BM, Kleinrouweler E, Verhoeven CJ, de Miranda E, van  
395 Wassenaer-Leemhuis AG, Kuiper PN, Porath M, Willekes C, Woiski MD, Sikkema MJ, Roumen FJ,  
396 Bossuyt PM, Haak MC, de Groot CJ, Mol BW, Pajkrt E. The capacity of mid-pregnancy cervical length  
397 to predict preterm birth in low-risk women: a national cohort study. Acta Obstet Gynecol Scand.  
398 2015;94(11):1223-34.
- 399 8. Iams JD, Berghella V. Care for women with prior preterm birth. Am J Obstet Gynecol.  
400 2010;203(2):89-100.

- 1  
2  
3 401 9. Conner SN, Frey HA, Cahill AG, Macones GA, Colditz GA, Tuuli MG. Loop electrosurgical  
4 402 excision procedure and risk of preterm birth: a systematic review and meta-analysis. *Obstet Gynecol.*  
5 403 2014;123(4):752-61.
- 6 404 10. Kazemier BM, Buijs PE, Mignini L, Limpens J, de Groot CJ, Mol BW, Ebm C. Impact of obstetric  
7 405 history on the risk of spontaneous preterm birth in singleton and multiple pregnancies: a systematic  
8 406 review. *BJOG.* 2014;121(10):1197-208; discussion 209.
- 9 407 11. Hughes K, Kane SC, Araujo Junior E, Da Silva Costa F, Sheehan PM. Cervical length as a  
10 408 predictor for spontaneous preterm birth in high-risk singleton pregnancy: current knowledge.  
11 409 *Ultrasound Obstet Gynecol.* 2016;48(1):7-15.
- 12 410 12. Vis JY, van Baaren GJ, Wilms FF, Oudijk MA, Kwee A, Porath MM, Scheepers HC,  
13 411 Spaanderman ME, Bloemenkamp KW, van Lith JM, Bolte AC, Bax CJ, Cornette J, Duvekot JJ, Nij  
14 412 Bijvank SW, van Eyck J, Franssen MT, Sollie KM, Woiski M, Vandenbussche FP, van der Post JA,  
15 413 Bossuyt PM, Opmeer BC, Mol BW. Randomized comparison of nifedipine and placebo in fibronectin-  
16 414 negative women with symptoms of preterm labor and a short cervix (APOSTEL-I Trial). *Am J Perinatol.*  
17 415 2015;32(5):451-60.
- 18 416 13. Wilms FF, Vis JY, de Wit-Zuurendonk L, Porath MM, Mol BW. What is the risk of preterm  
19 417 delivery after arrested preterm labor? *Am J Perinatol.* 2015;32(1):63-70.
- 20 418 14. Cornelissen LGH, van Oostrum NHM, van der Woude DAA, Rolf C, Porath MM, Oei SG, van  
21 419 Laar J. The diagnostic value of fetal fibronectin testing in clinical practice. *J Obstet Gynaecol Res.*  
22 420 2020;46(3):405-12.
- 23 421 15. Berghella V, Saccone G. Fetal fibronectin testing for reducing the risk of preterm birth.  
24 422 *Cochrane Database Syst Rev.* 2019;7:CD006843.
- 25 423 16. Mazza E, Parra-Saavedra M, Bajka M, Gratacos E, Nicolaidis K, Deprest J. In vivo assessment  
26 424 of the biomechanical properties of the uterine cervix in pregnancy. *Prenat Diagn.* 2014;34(1):33-41.
- 27 425 17. Badir S, Bajka M, Mazza E. A novel procedure for the mechanical characterization of the  
28 426 uterine cervix during pregnancy. *J Mech Behav Biomed Mater.* 2013;27:143-53.
- 29 427 18. Badir S, Mazza E, Zimmermann R, Bajka M. Cervical softening occurs early in pregnancy:  
30 428 characterization of cervical stiffness in 100 healthy women using the aspiration technique. *Prenat*  
31 429 *Diagn.* 2013;33(8):737-41.
- 32 430 19. Parra-Saavedra M, Gomez L, Barrero A, Parra G, Vergara F, Navarro E. Prediction of preterm  
33 431 birth using the cervical consistency index. *Ultrasound Obstet Gynecol.* 2011;38(1):44-51.
- 34 432 20. Shiina T, Nightingale KR, Palmeri ML, Hall TJ, Bamber JC, Barr RG, Castera L, Choi BI, Chou YH,  
35 433 Cosgrove D, Dietrich CF, Ding H, Amy D, Farrokh A, Ferraioli G, Filice C, Friedrich-Rust M, Nakashima  
36 434 K, Schafer F, Sporea I, Suzuki S, Wilson S, Kudo M. WFUMB guidelines and recommendations for  
37 435 clinical use of ultrasound elastography: Part 1: basic principles and terminology. *Ultrasound Med Biol.*  
38 436 2015;41(5):1126-47.
- 39 437 21. Ge W, Brooker G, Mogra R, Hyett J. Measured Hyperelastic Properties of Cervical Tissue with  
40 438 Shear-Wave Elastography. *Sensors (Basel).* 2021;22(1).
- 41 439 22. Stone J, House M. Measurement of cervical softness before cerclage placement with an  
42 440 aspiration-based device. *Am J Obstet Gynecol MFM.* 2023;5(4):100881.
- 43 441 23. Issaoui M, Debost-Legrand A, Skerl K, Chauveau B, Magnin B, Delabaere A, Boyer L, Sauvart-  
44 442 Rochat MP, Lemery D. Shear wave elastography safety in fetus: A quantitative health risk  
45 443 assessment. *Diagn Interv Imaging.* 2018;99(9):519-24.
- 46 444 24. Kagan KO, Sonek J. How to measure cervical length. *Ultrasound Obstet Gynecol.*  
47 445 2015;45(3):358-62.
- 48 446 25. Riley RD, Ensor J, Snell KIE, Harrell FE, Jr., Martin GP, Reitsma JB, Moons KGM, Collins G, van  
49 447 Smeden M. Calculating the sample size required for developing a clinical prediction model. *BMJ.*  
50 448 2020;368:m441.
- 51 449 26. Watson HA, Carter J, Seed PT, Tribe RM, Shennan AH. The QUiPP App: a safe alternative to a  
52 450 treat-all strategy for threatened preterm labor. *Ultrasound Obstet Gynecol.* 2017;50(3):342-6.



- 1  
2  
3 451 27. Watson HA, Seed PT, Carter J, Hezelgrave NL, Kuhrt K, Tribe RM, Shennan AH. Development  
4 452 and validation of predictive models for QUIPP App v.2: tool for predicting preterm birth in  
5 453 asymptomatic high-risk women. *Ultrasound Obstet Gynecol.* 2020;55(3):348-56.  
6 454 28. Goodfellow L, Care A, Sharp A, Ivandic J, Poljak B, Roberts D, Alfirevic Z. Effect of QUIPP  
7 455 prediction algorithm on treatment decisions in women with a previous preterm birth: a prospective  
8 456 cohort study. *BJOG.* 2019;126(13):1569-75.  
9 457 29. van Baaren GJ, Vis JY, Wilms FF, Oudijk MA, Kwee A, Porath MM, Scheepers HCJ,  
10 458 Spaanderman MEA, Bloemenkamp KWM, Haak MC, Bax CJ, Cornette JM, Duvekot JJ, Nij Bijvanck  
11 459 BWA, van Eyck J, Franssen MTM, Sollie KM, Vandenbussche F, Woiski M, Bolte AC, van der Post JAM,  
12 460 Bossuyt PMM, Opmeer BC, Mol BWJ. Cost-effectiveness of diagnostic testing strategies including  
13 461 cervical-length measurement and fibronectin testing in women with symptoms of preterm labor.  
14 462 *Ultrasound Obstet Gynecol.* 2018;51(5):596-603.

15  
16  
17 463  
18  
19 464  
20  
21  
22  
23  
24  
25  
26  
27  
28  
29  
30  
31  
32  
33  
34  
35  
36  
37  
38  
39  
40  
41  
42  
43  
44  
45  
46  
47  
48  
49  
50  
51  
52  
53  
54  
55  
56  
57  
58  
59  
60

For peer review only

**Table 1.** Sample size: A-STIPP cohort

| Number of predictors (n)         | 1   | 2   | 3   | 4   | 5   | 6   | 7   | 8   | 9    | 10   | 11   | 12   | 13   | 14   | 15   |
|----------------------------------|-----|-----|-----|-----|-----|-----|-----|-----|------|------|------|------|------|------|------|
| Minimum required sample size (n) | 227 | 240 | 360 | 480 | 600 | 720 | 840 | 960 | 1080 | 1200 | 1320 | 1440 | 1560 | 1680 | 1799 |

**Table 2.** Sample size S-STIPP cohort

| Number of predictors (n)         | 1   | 2   | 3   | 4   | 5   | 6   | 7   | 8   | 9   | 10  | 11  | 12  | 13  | 14  | 15  |
|----------------------------------|-----|-----|-----|-----|-----|-----|-----|-----|-----|-----|-----|-----|-----|-----|-----|
| Minimum required sample size (n) | 163 | 163 | 163 | 163 | 188 | 225 | 263 | 300 | 338 | 375 | 413 | 450 | 488 | 525 | 563 |

**Table 3.** Predictor variables

|    | <b>Predictor variable</b>            |
|----|--------------------------------------|
| 1  | Cervical length                      |
| 2  | Foetal fibronectin <sup>#</sup>      |
| 3  | Twin gestation                       |
| 4  | History of spontaneous preterm birth |
| 5  | Cervical surgery                     |
| 6  | Interpregnancy interval              |
| 7  | Presence of infection                |
| 8  | Family history                       |
| 9  | Social economic status               |
| 10 | Smoking                              |
| 11 | BMI                                  |

# S-STIPP only.

**Appendix 1: Timeline of study procedures**

Timeline A-STIPP cohort

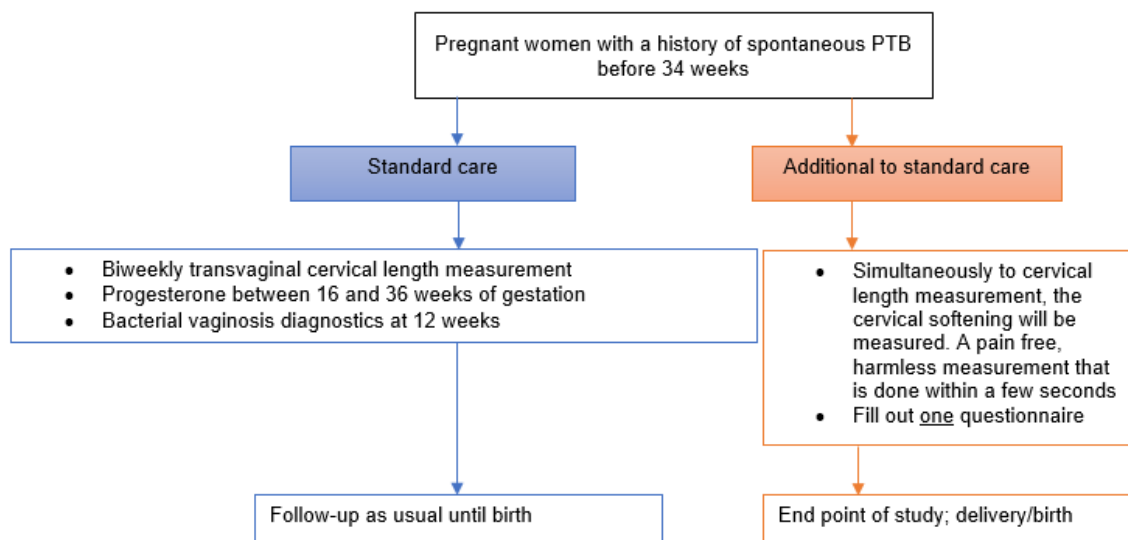

Timeline S-STIPP cohort

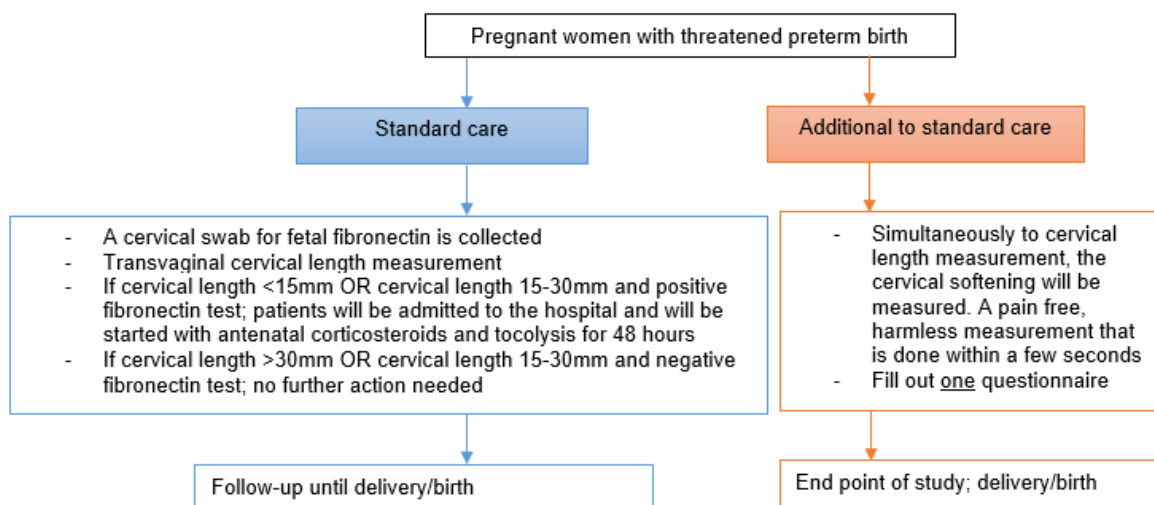

## Appendix 2: safety parameters of the Pregnolia System

- Vaginal or cervical blood loss (directly after measurement)
- Patient discomfort or dissatisfaction during Pregnolia® measurement(scaled 0 to 10)
- Preterm Prelabour Rupture Of Membranes (PPROM) (directly after measurement)
- Preterm labour (directly after measurement)
- Infections within seven days of measurement (Urinary Tract Infections, Vaginal infections, Intra-uterine infections)
- Irritation and sensitization of mucosal tissue
- Infection of the vaginal or mucosal tissue
- Tissue abrasion and vaginal discharge
- Spotting, light bleeding
- Superficial lacerations or minor tissue abrasions

# Reporting checklist for protocol of a clinical trial.

Based on the SPIRIT guidelines.

## Instructions to authors

Complete this checklist by entering the page numbers from your manuscript where readers will find each of the items listed below.

Your article may not currently address all the items on the checklist. Please modify your text to include the missing information. If you are certain that an item does not apply, please write "n/a" and provide a short explanation.

Upload your completed checklist as an extra file when you submit to a journal.

In your methods section, say that you used the SPIRIT reporting guidelines, and cite them as:

Chan A-W, Tetzlaff JM, Gøtzsche PC, Altman DG, Mann H, Berlin J, Dickersin K, Hróbjartsson A, Schulz KF, Parulekar WR, Krleža-Jerić K, Laupacis A, Moher D. SPIRIT 2013 Explanation and Elaboration: Guidance for protocols of clinical trials. *BMJ*. 2013;346:e7586

|                                   |                                                                                                                                 | Page   |
|-----------------------------------|---------------------------------------------------------------------------------------------------------------------------------|--------|
|                                   | Reporting Item                                                                                                                  | Number |
| <b>Administrative information</b> |                                                                                                                                 |        |
| Title                             | <a href="#">#1</a> Descriptive title identifying the study design, population, interventions, and, if applicable, trial acronym | 1      |

|    |                     |                     |                                                            |           |
|----|---------------------|---------------------|------------------------------------------------------------|-----------|
| 1  | Trial registration  | <a href="#">#2a</a> | Trial identifier and registry name. If not yet registered, | 2         |
| 2  |                     |                     | name of intended registry                                  |           |
| 3  |                     |                     |                                                            |           |
| 4  |                     |                     |                                                            |           |
| 5  |                     |                     |                                                            |           |
| 6  | Trial registration: | <a href="#">#2b</a> | All items from the World Health Organization Trial         | Abstract/ |
| 7  |                     |                     | Registration Data Set                                      | protocol  |
| 8  | data set            |                     |                                                            |           |
| 9  |                     |                     |                                                            |           |
| 10 |                     |                     |                                                            |           |
| 11 | Protocol version    | <a href="#">#3</a>  | Date and version identifier                                | 2         |
| 12 |                     |                     |                                                            |           |
| 13 |                     |                     |                                                            |           |
| 14 |                     |                     |                                                            |           |
| 15 | Funding             | <a href="#">#4</a>  | Sources and types of financial, material, and other        | 14        |
| 16 |                     |                     | support                                                    |           |
| 17 |                     |                     |                                                            |           |
| 18 |                     |                     |                                                            |           |
| 19 |                     |                     |                                                            |           |
| 20 | Roles and           | <a href="#">#5a</a> | Names, affiliations, and roles of protocol contributors    | 1         |
| 21 |                     |                     |                                                            |           |
| 22 | responsibilities:   |                     |                                                            |           |
| 23 |                     |                     |                                                            |           |
| 24 | contributorship     |                     |                                                            |           |
| 25 |                     |                     |                                                            |           |
| 26 |                     |                     |                                                            |           |
| 27 |                     |                     |                                                            |           |
| 28 | Roles and           | <a href="#">#5b</a> | Name and contact information for the trial sponsor         | 1         |
| 29 |                     |                     |                                                            |           |
| 30 | responsibilities:   |                     |                                                            |           |
| 31 |                     |                     |                                                            |           |
| 32 | sponsor contact     |                     |                                                            |           |
| 33 |                     |                     |                                                            |           |
| 34 | information         |                     |                                                            |           |
| 35 |                     |                     |                                                            |           |
| 36 |                     |                     |                                                            |           |
| 37 |                     |                     |                                                            |           |
| 38 | Roles and           | <a href="#">#5c</a> | Role of study sponsor and funders, if any, in study        | 14        |
| 39 |                     |                     | design; collection, management, analysis, and              |           |
| 40 | responsibilities:   |                     | interpretation of data; writing of the report; and the     |           |
| 41 |                     |                     | decision to submit the report for publication, including   |           |
| 42 | sponsor and funder  |                     | whether they will have ultimate authority over any of      |           |
| 43 |                     |                     | these activities                                           |           |
| 44 |                     |                     |                                                            |           |
| 45 |                     |                     |                                                            |           |
| 46 |                     |                     |                                                            |           |
| 47 |                     |                     |                                                            |           |
| 48 |                     |                     |                                                            |           |
| 49 |                     |                     |                                                            |           |
| 50 |                     |                     |                                                            |           |
| 51 |                     |                     |                                                            |           |
| 52 | Roles and           | <a href="#">#5d</a> | Composition, roles, and responsibilities of the            | NA        |
| 53 |                     |                     | coordinating centre, steering committee, endpoint          |           |
| 54 | responsibilities:   |                     | adjudication committee, data management team, and          |           |
| 55 |                     |                     |                                                            |           |
| 56 | committees          |                     |                                                            |           |
| 57 |                     |                     |                                                            |           |
| 58 |                     |                     |                                                            |           |
| 59 |                     |                     |                                                            |           |
| 60 |                     |                     |                                                            |           |

other individuals or groups overseeing the trial, if applicable (see Item 21a for data monitoring committee)

## Introduction

|                                                  |                     |                                                                                                                                                                                                            |   |
|--------------------------------------------------|---------------------|------------------------------------------------------------------------------------------------------------------------------------------------------------------------------------------------------------|---|
| Background and rationale                         | <a href="#">#6a</a> | Description of research question and justification for undertaking the trial, including summary of relevant studies (published and unpublished) examining benefits and harms for each intervention         | 3 |
| Background and rationale: choice of comparators  | <a href="#">#6b</a> | Explanation for choice of comparators                                                                                                                                                                      | 3 |
| Objectives                                       | <a href="#">#7</a>  | Specific objectives or hypotheses                                                                                                                                                                          | 5 |
| Trial design                                     | <a href="#">#8</a>  | Description of trial design including type of trial (eg, parallel group, crossover, factorial, single group), allocation ratio, and framework (eg, superiority, equivalence, non-inferiority, exploratory) | 5 |
| <b>Methods:</b>                                  |                     |                                                                                                                                                                                                            |   |
| <b>Participants, interventions, and outcomes</b> |                     |                                                                                                                                                                                                            |   |
| Study setting                                    | <a href="#">#9</a>  | Description of study settings (eg, community clinic, academic hospital) and list of countries where data will be collected. Reference to where list of study sites can be obtained                         | 5 |



|    |                      |                      |                                                            |     |
|----|----------------------|----------------------|------------------------------------------------------------|-----|
| 1  | Eligibility criteria | <a href="#">#10</a>  | Inclusion and exclusion criteria for participants. If      | 6   |
| 2  |                      |                      |                                                            |     |
| 3  |                      |                      |                                                            |     |
| 4  |                      |                      | applicable, eligibility criteria for study centres and     |     |
| 5  |                      |                      |                                                            |     |
| 6  |                      |                      | individuals who will perform the interventions (eg,        |     |
| 7  |                      |                      |                                                            |     |
| 8  |                      |                      | surgeons, psychotherapists)                                |     |
| 9  |                      |                      |                                                            |     |
| 10 |                      |                      |                                                            |     |
| 11 | Interventions:       | <a href="#">#11a</a> | Interventions for each group with sufficient detail to     | 7   |
| 12 |                      |                      |                                                            |     |
| 13 | description          |                      | allow replication, including how and when they will be     |     |
| 14 |                      |                      |                                                            |     |
| 15 |                      |                      |                                                            |     |
| 16 |                      |                      | administered                                               |     |
| 17 |                      |                      |                                                            |     |
| 18 |                      |                      |                                                            |     |
| 19 | Interventions:       | <a href="#">#11b</a> | Criteria for discontinuing or modifying allocated          | NA  |
| 20 |                      |                      |                                                            |     |
| 21 | modifications        |                      | interventions for a given trial participant (eg, drug dose |     |
| 22 |                      |                      |                                                            |     |
| 23 |                      |                      | change in response to harms, participant request, or       |     |
| 24 |                      |                      |                                                            |     |
| 25 |                      |                      | improving / worsening disease)                             |     |
| 26 |                      |                      |                                                            |     |
| 27 |                      |                      |                                                            |     |
| 28 |                      |                      |                                                            |     |
| 29 | Interventions:       | <a href="#">#11c</a> | Strategies to improve adherence to intervention            | NA  |
| 30 |                      |                      |                                                            |     |
| 31 | adherence            |                      | protocols, and any procedures for monitoring adherence     |     |
| 32 |                      |                      |                                                            |     |
| 33 |                      |                      | (eg, drug tablet return; laboratory tests)                 |     |
| 34 |                      |                      |                                                            |     |
| 35 |                      |                      |                                                            |     |
| 36 | Interventions:       | <a href="#">#11d</a> | Relevant concomitant care and interventions that are       | 7   |
| 37 |                      |                      |                                                            |     |
| 38 | concomitant care     |                      | permitted or prohibited during the trial                   |     |
| 39 |                      |                      |                                                            |     |
| 40 |                      |                      |                                                            |     |
| 41 |                      |                      |                                                            |     |
| 42 | Outcomes             | <a href="#">#12</a>  | Primary, secondary, and other outcomes, including the      | 8/9 |
| 43 |                      |                      |                                                            |     |
| 44 |                      |                      | specific measurement variable (eg, systolic blood          |     |
| 45 |                      |                      |                                                            |     |
| 46 |                      |                      | pressure), analysis metric (eg, change from baseline,      |     |
| 47 |                      |                      |                                                            |     |
| 48 |                      |                      | final value, time to event), method of aggregation (eg,    |     |
| 49 |                      |                      |                                                            |     |
| 50 |                      |                      | median, proportion), and time point for each outcome.      |     |
| 51 |                      |                      |                                                            |     |
| 52 |                      |                      |                                                            |     |
| 53 |                      |                      | Explanation of the clinical relevance of chosen efficacy   |     |
| 54 |                      |                      |                                                            |     |
| 55 |                      |                      | and harm outcomes is strongly recommended                  |     |
| 56 |                      |                      |                                                            |     |
| 57 |                      |                      |                                                            |     |
| 58 |                      |                      |                                                            |     |
| 59 |                      |                      |                                                            |     |
| 60 |                      |                      |                                                            |     |

|                                                                                                    |                                                                               |                      |                                                                                                                                                                                                                                                                                                                                                          |               |
|----------------------------------------------------------------------------------------------------|-------------------------------------------------------------------------------|----------------------|----------------------------------------------------------------------------------------------------------------------------------------------------------------------------------------------------------------------------------------------------------------------------------------------------------------------------------------------------------|---------------|
| 1<br>2<br>3<br>4<br>5<br>6<br>7<br>8<br>9                                                          | Participant timeline                                                          | <a href="#">#13</a>  | Time schedule of enrolment, interventions (including any run-ins and washouts), assessments, and visits for participants. A schematic diagram is highly recommended (see Figure)                                                                                                                                                                         | Appendix<br>1 |
| 10<br>11<br>12<br>13<br>14<br>15<br>16<br>17<br>18<br>19<br>20                                     | Sample size                                                                   | <a href="#">#14</a>  | Estimated number of participants needed to achieve study objectives and how it was determined, including clinical and statistical assumptions supporting any sample size calculations                                                                                                                                                                    | 9             |
| 21<br>22<br>23<br>24<br>25                                                                         | Recruitment                                                                   | <a href="#">#15</a>  | Strategies for achieving adequate participant enrolment to reach target sample size                                                                                                                                                                                                                                                                      | NA            |
| 26<br>27<br>28<br>29<br>30<br>31<br>32<br>33<br>34<br>35                                           | <b>Methods:</b><br><b>Assignment of interventions (for controlled trials)</b> |                      |                                                                                                                                                                                                                                                                                                                                                          |               |
| 36<br>37<br>38<br>39<br>40<br>41<br>42<br>43<br>44<br>45<br>46<br>47<br>48<br>49<br>50<br>51<br>52 | Allocation: sequence generation                                               | <a href="#">#16a</a> | Method of generating the allocation sequence (eg, computer-generated random numbers), and list of any factors for stratification. To reduce predictability of a random sequence, details of any planned restriction (eg, blocking) should be provided in a separate document that is unavailable to those who enrol participants or assign interventions | NA            |
| 53<br>54<br>55<br>56<br>57<br>58<br>59<br>60                                                       | Allocation concealment mechanism                                              | <a href="#">#16b</a> | Mechanism of implementing the allocation sequence (eg, central telephone; sequentially numbered, opaque,                                                                                                                                                                                                                                                 | NA            |

sealed envelopes), describing any steps to conceal the sequence until interventions are assigned

Allocation: [#16c](#) Who will generate the allocation sequence, who will enrol participants, and who will assign participants to interventions

NA

Blinding (masking) [#17a](#) Who will be blinded after assignment to interventions (eg, trial participants, care providers, outcome assessors, data analysts), and how

8

Blinding (masking): [#17b](#) If blinded, circumstances under which unblinding is permissible, and procedure for revealing a participant's allocated intervention during the trial

NA

**Methods: Data collection, management, and analysis**

Data collection plan [#18a](#) Plans for assessment and collection of outcome, baseline, and other trial data, including any related processes to promote data quality (eg, duplicate measurements, training of assessors) and a description of study instruments (eg, questionnaires, laboratory tests) along with their reliability and validity, if known. Reference to where data collection forms can be found, if not in the protocol

7

|    |                            |                      |                                                             |    |
|----|----------------------------|----------------------|-------------------------------------------------------------|----|
| 1  | Data collection plan:      | <a href="#">#18b</a> | Plans to promote participant retention and complete         | NA |
| 2  |                            |                      |                                                             |    |
| 3  | retention                  |                      | follow-up, including list of any outcome data to be         |    |
| 4  |                            |                      | collected for participants who discontinue or deviate       |    |
| 5  |                            |                      | from intervention protocols                                 |    |
| 6  |                            |                      |                                                             |    |
| 7  |                            |                      |                                                             |    |
| 8  |                            |                      |                                                             |    |
| 9  |                            |                      |                                                             |    |
| 10 |                            |                      |                                                             |    |
| 11 | Data management            | <a href="#">#19</a>  | Plans for data entry, coding, security, and storage,        | 12 |
| 12 |                            |                      | including any related processes to promote data quality     |    |
| 13 |                            |                      | (eg, double data entry; range checks for data values).      |    |
| 14 |                            |                      | Reference to where details of data management               |    |
| 15 |                            |                      | procedures can be found, if not in the protocol             |    |
| 16 |                            |                      |                                                             |    |
| 17 |                            |                      |                                                             |    |
| 18 |                            |                      |                                                             |    |
| 19 |                            |                      |                                                             |    |
| 20 |                            |                      |                                                             |    |
| 21 |                            |                      |                                                             |    |
| 22 |                            |                      |                                                             |    |
| 23 | Statistics: outcomes       | <a href="#">#20a</a> | Statistical methods for analysing primary and secondary     | 10 |
| 24 |                            |                      | outcomes. Reference to where other details of the           |    |
| 25 |                            |                      | statistical analysis plan can be found, if not in the       |    |
| 26 |                            |                      | protocol                                                    |    |
| 27 |                            |                      |                                                             |    |
| 28 |                            |                      |                                                             |    |
| 29 |                            |                      |                                                             |    |
| 30 |                            |                      |                                                             |    |
| 31 |                            |                      |                                                             |    |
| 32 |                            |                      |                                                             |    |
| 33 | Statistics: additional     | <a href="#">#20b</a> | Methods for any additional analyses (eg, subgroup and       | 10 |
| 34 | analyses                   |                      | adjusted analyses)                                          |    |
| 35 |                            |                      |                                                             |    |
| 36 |                            |                      |                                                             |    |
| 37 |                            |                      |                                                             |    |
| 38 |                            |                      |                                                             |    |
| 39 | Statistics: analysis       | <a href="#">#20c</a> | Definition of analysis population relating to protocol non- | NA |
| 40 | population and             |                      | adherence (eg, as randomised analysis), and any             |    |
| 41 | missing data               |                      | statistical methods to handle missing data (eg, multiple    |    |
| 42 |                            |                      | imputation)                                                 |    |
| 43 |                            |                      |                                                             |    |
| 44 |                            |                      |                                                             |    |
| 45 |                            |                      |                                                             |    |
| 46 |                            |                      |                                                             |    |
| 47 |                            |                      |                                                             |    |
| 48 | <b>Methods: Monitoring</b> |                      |                                                             |    |
| 49 |                            |                      |                                                             |    |
| 50 |                            |                      |                                                             |    |
| 51 | Data monitoring:           | <a href="#">#21a</a> | Composition of data monitoring committee (DMC);             | 12 |
| 52 | formal committee           |                      | summary of its role and reporting structure; statement of   |    |
| 53 |                            |                      | whether it is independent from the sponsor and              |    |
| 54 |                            |                      |                                                             |    |
| 55 |                            |                      |                                                             |    |
| 56 |                            |                      |                                                             |    |
| 57 |                            |                      |                                                             |    |
| 58 |                            |                      |                                                             |    |
| 59 |                            |                      |                                                             |    |
| 60 |                            |                      |                                                             |    |

1 competing interests; and reference to where further  
 2 details about its charter can be found, if not in the  
 3 protocol. Alternatively, an explanation of why a DMC is  
 4 not needed  
 5  
 6  
 7  
 8  
 9

|    |                         |                      |                                                              |    |
|----|-------------------------|----------------------|--------------------------------------------------------------|----|
| 10 | <b>Data monitoring:</b> | <a href="#">#21b</a> | Description of any interim analyses and stopping             | NA |
| 11 | <b>interim analysis</b> |                      | guidelines, including who will have access to these          |    |
| 12 |                         |                      | interim results and make the final decision to terminate     |    |
| 13 |                         |                      | the trial                                                    |    |
| 14 |                         |                      |                                                              |    |
| 15 |                         |                      |                                                              |    |
| 16 |                         |                      |                                                              |    |
| 17 |                         |                      |                                                              |    |
| 18 |                         |                      |                                                              |    |
| 19 |                         |                      |                                                              |    |
| 20 | <b>Harms</b>            | <a href="#">#22</a>  | Plans for collecting, assessing, reporting, and managing     | 12 |
| 21 |                         |                      | solicited and spontaneously reported adverse events          |    |
| 22 |                         |                      | and other unintended effects of trial interventions or trial |    |
| 23 |                         |                      | conduct                                                      |    |
| 24 |                         |                      |                                                              |    |
| 25 |                         |                      |                                                              |    |
| 26 |                         |                      |                                                              |    |
| 27 |                         |                      |                                                              |    |
| 28 |                         |                      |                                                              |    |
| 29 |                         |                      |                                                              |    |
| 30 | <b>Auditing</b>         | <a href="#">#23</a>  | Frequency and procedures for auditing trial conduct, if      | NA |
| 31 |                         |                      | any, and whether the process will be independent from        |    |
| 32 |                         |                      | investigators and the sponsor                                |    |
| 33 |                         |                      |                                                              |    |
| 34 |                         |                      |                                                              |    |
| 35 |                         |                      |                                                              |    |
| 36 |                         |                      |                                                              |    |
| 37 |                         |                      |                                                              |    |
| 38 | <b>Ethics and</b>       |                      |                                                              |    |
| 39 | <b>dissemination</b>    |                      |                                                              |    |
| 40 |                         |                      |                                                              |    |
| 41 |                         |                      |                                                              |    |
| 42 |                         |                      |                                                              |    |
| 43 | <b>Research ethics</b>  | <a href="#">#24</a>  | Plans for seeking research ethics committee /                | 12 |
| 44 | <b>approval</b>         |                      | institutional review board (REC / IRB) approval              |    |
| 45 |                         |                      |                                                              |    |
| 46 |                         |                      |                                                              |    |
| 47 |                         |                      |                                                              |    |
| 48 | <b>Protocol</b>         | <a href="#">#25</a>  | Plans for communicating important protocol                   | NA |
| 49 | <b>amendments</b>       |                      | modifications (eg, changes to eligibility criteria,          |    |
| 50 |                         |                      | outcomes, analyses) to relevant parties (eg,                 |    |
| 51 |                         |                      | investigators, REC / IRBs, trial participants, trial         |    |
| 52 |                         |                      | registries, journals, regulators)                            |    |
| 53 |                         |                      |                                                              |    |
| 54 |                         |                      |                                                              |    |
| 55 |                         |                      |                                                              |    |
| 56 |                         |                      |                                                              |    |
| 57 |                         |                      |                                                              |    |
| 58 |                         |                      |                                                              |    |
| 59 |                         |                      |                                                              |    |
| 60 |                         |                      |                                                              |    |

|    |                       |                      |                                                            |    |
|----|-----------------------|----------------------|------------------------------------------------------------|----|
| 1  | Consent or assent     | <a href="#">#26a</a> | Who will obtain informed consent or assent from            | 11 |
| 2  |                       |                      |                                                            |    |
| 3  |                       |                      |                                                            |    |
| 4  |                       |                      | potential trial participants or authorised surrogates, and |    |
| 5  |                       |                      |                                                            |    |
| 6  |                       |                      | how (see Item 32)                                          |    |
| 7  |                       |                      |                                                            |    |
| 8  |                       |                      |                                                            |    |
| 9  | Consent or assent:    | <a href="#">#26b</a> | Additional consent provisions for collection and use of    | NA |
| 10 |                       |                      |                                                            |    |
| 11 | ancillary studies     |                      | participant data and biological specimens in ancillary     |    |
| 12 |                       |                      |                                                            |    |
| 13 |                       |                      | studies, if applicable                                     |    |
| 14 |                       |                      |                                                            |    |
| 15 |                       |                      |                                                            |    |
| 16 | Confidentiality       | <a href="#">#27</a>  | How personal information about potential and enrolled      | 12 |
| 17 |                       |                      |                                                            |    |
| 18 |                       |                      | participants will be collected, shared, and maintained in  |    |
| 19 |                       |                      |                                                            |    |
| 20 |                       |                      | order to protect confidentiality before, during, and after |    |
| 21 |                       |                      |                                                            |    |
| 22 |                       |                      | the trial                                                  |    |
| 23 |                       |                      |                                                            |    |
| 24 |                       |                      |                                                            |    |
| 25 |                       |                      |                                                            |    |
| 26 | Declaration of        | <a href="#">#28</a>  | Financial and other competing interests for principal      | 14 |
| 27 |                       |                      |                                                            |    |
| 28 | interests             |                      | investigators for the overall trial and each study site    |    |
| 29 |                       |                      |                                                            |    |
| 30 |                       |                      |                                                            |    |
| 31 |                       |                      |                                                            |    |
| 32 | Data access           | <a href="#">#29</a>  | Statement of who will have access to the final trial       | 12 |
| 33 |                       |                      |                                                            |    |
| 34 |                       |                      | dataset, and disclosure of contractual agreements that     |    |
| 35 |                       |                      |                                                            |    |
| 36 |                       |                      | limit such access for investigators                        |    |
| 37 |                       |                      |                                                            |    |
| 38 |                       |                      |                                                            |    |
| 39 | Ancillary and post    | <a href="#">#30</a>  | Provisions, if any, for ancillary and post-trial care, and | NA |
| 40 |                       |                      |                                                            |    |
| 41 | trial care            |                      | for compensation to those who suffer harm from trial       |    |
| 42 |                       |                      |                                                            |    |
| 43 |                       |                      | participation                                              |    |
| 44 |                       |                      |                                                            |    |
| 45 |                       |                      |                                                            |    |
| 46 |                       |                      |                                                            |    |
| 47 | Dissemination policy: | <a href="#">#31a</a> | Plans for investigators and sponsor to communicate trial   | 12 |
| 48 |                       |                      |                                                            |    |
| 49 | trial results         |                      | results to participants, healthcare professionals, the     |    |
| 50 |                       |                      |                                                            |    |
| 51 |                       |                      | public, and other relevant groups (eg, via publication,    |    |
| 52 |                       |                      |                                                            |    |
| 53 |                       |                      | reporting in results databases, or other data sharing      |    |
| 54 |                       |                      |                                                            |    |
| 55 |                       |                      | arrangements), including any publication restrictions      |    |
| 56 |                       |                      |                                                            |    |
| 57 |                       |                      |                                                            |    |
| 58 |                       |                      |                                                            |    |
| 59 |                       |                      |                                                            |    |
| 60 |                       |                      |                                                            |    |

1 Dissemination policy: [#31b](#) Authorship eligibility guidelines and any intended use of NA  
 2  
 3 authorship professional writers  
 4  
 5

6 Dissemination policy: [#31c](#) Plans, if any, for granting public access to the full NA  
 7  
 8 reproducible protocol, participant-level dataset, and statistical code  
 9  
 10 research  
 11  
 12

## 13 Appendices

14  
 15  
 16  
 17 Informed consent [#32](#) Model consent form and other related documentation Appendix  
 18  
 19 materials given to participants and authorised surrogates 3  
 20  
 21

22  
 23 Biological specimens [#33](#) Plans for collection, laboratory evaluation, and storage NA  
 24  
 25 of biological specimens for genetic or molecular analysis  
 26  
 27 in the current trial and for future use in ancillary studies,  
 28  
 29 if applicable  
 30  
 31

32  
 33 None The SPIRIT Explanation and Elaboration paper is distributed under the terms of the Creative  
 34  
 35 Commons Attribution License CC-BY-NC. This checklist can be completed online using  
 36  
 37 <https://www.goodreports.org/>, a tool made by the [EQUATOR Network](#) in collaboration with  
 38  
 39 [Penelope.ai](#)  
 40  
 41  
 42  
 43  
 44  
 45  
 46  
 47  
 48  
 49  
 50  
 51  
 52  
 53  
 54  
 55  
 56  
 57  
 58  
 59  
 60
