# Supplementary material for: Assessment of cervical softening and the prediction of preterm birth (STIPP): protocol for a prospective cohort study
Source: PubMed Central journal article supplement — BMJ Open. 2023 Nov 21;13(11):e071597. doi: 10.1136/bmjopen-2023-071597 (PMC10668305; doi:10.1136/bmjopen-2023-071597), 2023-11-21
Supplement: bmjopen-2023-071597supp002.pdf [file bmjopen-2023-071597supp002.pdf]

**Appendix 2: safety parameters of the Pregnolia System**

- Vaginal or cervical blood loss (directly after measurement)
- Patient discomfort or dissatisfaction during Pregnolia® measurement(scaled 0 to 10)
- Preterm Prelabour Rupture Of Membranes (PPROM) (directly after measurement)
- Preterm labour (directly after measurement)
- Infections within seven days of measurement (Urinary Tract Infections, Vaginal infections, Intra-uterine infections)
- Irritation and sensitization of mucosal tissue
- Infection of the vaginal or mucosal tissue
- Tissue abrasion and vaginal discharge
- Spotting, light bleeding
- Superficial lacerations or minor tissue abrasions
