# Supplementary figures and images for: Assessment of cervical softening and the prediction of preterm birth (STIPP): protocol for a prospective cohort study
Source: PubMed Central journal article supplement — BMJ Open. 2023 Nov 21;13(11):e071597. doi: 10.1136/bmjopen-2023-071597 (PMC10668305; doi:10.1136/bmjopen-2023-071597), 2023-11-21

**Appendix 1: Timeline of study procedures**

## Timeline A-STIPP cohort

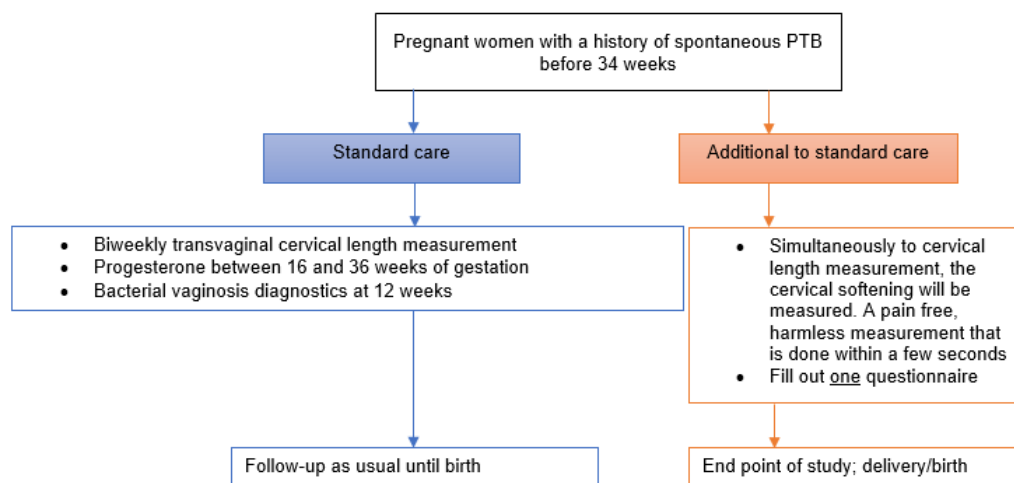

## Timeline S-STIPP cohort

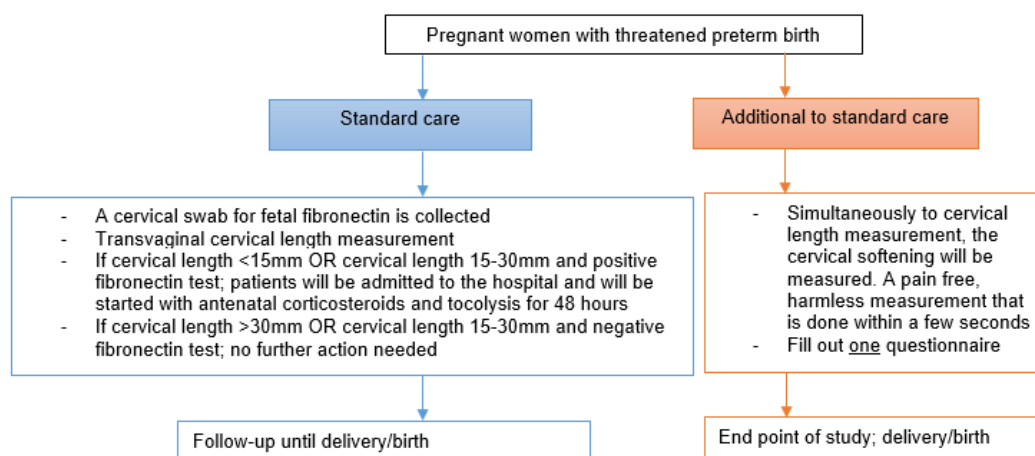

Supplement: bmjopen-2023-071597supp001.pdf [file bmjopen-2023-071597supp001.pdf]
